# Supplementary material for: Sleep-Dependent Reactivation of Ensembles in Motor Cortex Promotes Skill Consolidation
Source: PLoS Biol. 2015 Sep 18;13(9):e1002263. doi: 10.1371/journal.pbio.1002263 (PMC4575076; doi:10.1371/journal.pbio.1002263)
Supplement: S1 Data — (XLSX) [file pbio.1002263.s001.xlsx]

## Sheet: S2 Fig_Summary_Trajectory_Stats
Internal Reference Stats										External Reference
online	online	CI			offline	mean	CI			online					offline
0	-2.19316	-5.3383	0.859535		0	-2.21169	-5.17555	0.746139		190	-7.86326	-15.4226	-0.420825	*	1.96015	-9.92415	13.3859
4	4.13931	-0.024225	8.23855		4	-10.6987	-14.6136	-6.70563	*	186	-0.0804781	-5.87928	5.69903		-5.09361	-13.2587	3.81246
8	-0.233534	-6.47376	5.91473		8	-7.02354	-12.1247	-1.85609	*	182	-9.2615	-16.0527	-2.26557	*	0.577984	-9.11016	10.1372
12	-2.58344	-8.71592	3.12584		12	-5.94016	-11.3812	-0.306822	*	178	-8.13577	-16.0359	-0.0234446	*	-4.26203	-16.4316	7.9546
16	3.26923	-1.09118	7.61479		16	-12.7849	-17.0059	-8.59457	*	174	-3.4283	-10.3737	3.33367		-4.70973	-15.5831	6.44629
20	-2.02152	-7.63631	3.58808		20	-10.793	-16.5945	-4.97173	*	170	-6.58208	-13.2096	-0.0994015	*	-0.768737	-10.5377	9.09962
24	-5.44558	-11.0663	0.124636		24	-7.87227	-13.2813	-2.22687	*	166	-8.93274	-14.3201	-3.63124	*	4.13143	-3.29567	11.6406
28	0.0143227	-4.98071	5.03473		28	-6.00509	-11.9692	0.0353275		162	-8.67718	-14.4826	-3.01407	*	5.16077	-2.76918	13.6192
32	0.0460569	-4.18947	4.285		32	-3.78031	-8.36112	0.929486		158	-2.40556	-8.36441	3.54413		1.34148	-6.3066	9.46423
36	-4.09881	-8.76069	0.572366		36	0.136657	-4.69419	5.11144		154	-1.94794	-6.03355	2.34534		-0.403894	-5.62777	4.78238
40	-3.70041	-8.05029	0.606076		40	-4.50269	-9.30705	0.46157		150	-3.06327	-5.45567	-0.715166	*	0.528952	-3.12812	4.397
44	-6.23066	-10.2945	-2.02551	*	44	1.74862	-2.64396	6.09029		146	-4.28402	-7.07432	-1.61501	*	2.26761	-1.67676	6.53121
48	-5.24369	-9.32808	-1.09532	*	48	0.299275	-4.49885	5.09666		142	-3.10981	-5.00665	-1.2502	*	1.57066	-1.67934	4.76748
52	3.41621	-0.561457	7.48429		52	0.159759	-4.82692	5.09039		138	2.52174	0.475663	4.58071		-3.76079	-7.05207	-0.455458	*
56	7.59732	4.55736	10.6954		56	-8.08694	-12.358	-3.66508	*	134	0.845068	-1.25963	2.98817		-3.3093	-6.18686	-0.459272	*
60	2.86536	-2.21198	7.98548		60	0.0535889	-4.92036	4.93558		130	0.108668	-2.75759	3.02023		-2.82103	-6.94247	1.02442
	Raw Data included in SuppFig2.mat

## Sheet: SuppFig 5C
RT_DATA	mean speed of skilled reach across animals
	B1_early	B1_late	B2_early(post sleep)
Trial 1	0.636364	1.13939	0.557576
Trial 2	0.515152	0.90303	0.812121
Trial 3	0.745455	1.87879	0.666667
Trial 4	1.32727	1.02424	0.721212
Trial 5	0.987879	1.27879	0.521212
Trial 6	1	0.860606	1.07879
Trial 7	1.39394	1.23636	0.612121
Trial 8	0.824242	1.25455	0.618182
Trial 9	1.31515	0.993939	0.751515
Trial 10	0.606061	0.818182	0.533333
Trial 11	1.4303	1.06667	0.690909
Trial 12	0.684848	1.16364	0.593939
Trial 13	1.36364	0.587879	0.745455
Trial 14	0.793939	1.26667	0.569697
Trial 15	0.89697	0.769697	0.418182
Trial 16	1.10303	1.46061	0.963636
Trial 17	0.751515	0.70303	0.50303
Trial 18	1.10303	1.29091	1
Trial 19	0.921212	0.860606	0.642424
Trial 20	0.551515	0.836364	0.454545
	Early	Late	Post
Mean	0.947576	1.0697	0.672727
SEM	0.0665916	0.0671182	0.0401149
	Early vs. Late	Late vs. Post-Sleep
T-test	0.204285	1.04412e-05

## Sheet: SuppFig 5D
ACC_DATA	mean success across animals
	B1_early	B1_late	B2_early(post sleep)
Trial 1	0.2	0.8	0.8
Trial 2	0.2	0.6	0.2
Trial 3	0.4	0.2	0.4
Trial 4	0.4	0.6	0.6
Trial 5	0.2	0.4	0.4
Trial 6	0.2	0.4	0.4
Trial 7	0.2	0.4	0.6
Trial 8	0	0.2	0.8
Trial 9	0	0.4	0.8
Trial 10	0.2	0.6	0.8
Trial 11	0.4	0.6	0.4
Trial 12	0.4	0.2	0.4
Trial 13	0.2	0.6	0.6
Trial 14	0.4	0.4	0.6
Trial 15	0.4	0.6	0.6
Trial 16	0	0.4	0.8
Trial 17	0.2	0.2	0.8
Trial 18	0.2	0.2	0.2
Trial 19	0.2	0	0.4
Trial 20	0.2	0.4	0.2
	0.4	0.2	0.4
	B1_early	B1_late	B2_early(post sleep)
Mean	0.23	0.41	0.54
SEM	0.03	0.0364668	0.0394702
	Early vs. Late	Late vs. Post-Sleep
T-test	0.00185817	0.0555375

## Sheet: SuppFig 7D
Pre_Learning_Template_Matching							Post_Learning_Template_Matching
Template_bin_size	25	10	5	2	1		25	10	5	2	1
	-0.0227803	0.233229	0.274341	0.404528	0.22838		-0.02405	0.279834	0.278819	0.404784	0.22839
	0.210763	0.243593	0.324032	0.497405	0.244244		-0.0250466	0.263497	0.26696	0.404784	0.22839
	-0.00304861	0.267749	0.290059	0.404528	0.326945		-0.00589321	0.250324	0.266093	0.271537	0.327089
	-0.0484377	0.227755	0.267152	0.404528	0.22838		-0.00166647	0.237479	0.30848	0.404784	0.244231
	0.0784393	0.294824	0.246008	0.404528	0.22838		0.0753357	0.295442	0.250362	0.404784	0.22839
	0.133789	0.286153	0.401287	0.404528	0.22838		0.128027	0.306816	0.299058	0.404784	0.22839
	0.105852	0.149417	0.147273	0.497405	0.22838		-0.0374364	0.323467	0.30848	0.297987	0.244231
	-0.0289823	0.401205	0.271166	0.31319	0.317789		0.0437444	0.207687	0.198272	0.297987	0.225823
	-0.050907	0.104723	0.203986	0.271669	0.244244		-0.0468706	0.262337	0.257083	0.404784	0.22839
	0.023536	0.0888461	0.211459	0.297989	0.225752		0.0824589	0.259261	0.257083	0.404784	0.22839
	0.154136	0.287703	0.25708	0.297989	0.225752		0.0701809	0.26621	0.30848	0.404784	0.244231
	-0.011247	0.219044	0.211969	0.404528	0.244244		0.205386	0.282667	0.211458	0.404784	0.244231
	-0.0795377	0.323774	0.320316	0.271669	0.244244		-0.0550492	0.293334	0.32438	0.143076	0.146883
	-0.0244886	0.434879	0.319637	0.366106	0.244244		0.00139731	0.171567	0.274802	0.404784	0.22839
	-0.0199733	0.049157	0.217278	0.404528	0.244244		0.0398538	0.171765	0.335658	0.404784	0.22839
	0.0320772	0.182306	0.335901	0.497405	0.22838		0.0284131	0.279834	0.26696	0.220522	0.146883
	-0.0627362	0.299337	0.275127	0.404528	0.22838		-0.0486286	0.184358	0.424423	0.297987	0.244231
	-0.0255201	0.296092	0.275127	0.458161	0.22838		-0.00903289	0.136825	0.318676	0.297987	0.329056
	-0.0197518	0.165926	0.249492	0.297989	0.244244		0.0081959	0.224615	0.21301	0.343981	0.225823
	0.00289422	0.226625	0.254605	0.297989	0.146871		-0.0639681	0.293345	0.395453	0.404784	0.22839
	-0.00107069	0.104723	0.3634	0.271669	0.244244		-0.0183027	0.271576	0.290148	0.404784	0.22839
	0.0477682	0.108939	0.211969	0.404528	0.22838		0.0191085	0.107807	0.260987	0.404784	0.22839
	-0.0394522	0.238296	0.290142	0.404528	0.22838		0.0282323	0.284629	0.30848	0.404784	0.322682
	0.120274	0.263686	0.308455	0.404528	0.326945		0.00545126	0.117571	0.259845	0.297987	0.225823
	0.0186328	0.186648	0.335901	0.367141	-0.185741		-0.0613793	0.210755	0.143643	0.297987	0.225823
	-0.0369974	0.267333	0.308455	0.271669	0.244244		0.0524184	0.173365	0.30848	0.404784	0.244231
	0.113738	0.291024	0.146591	0.271669	0.244244		0.0499501	0.213075	0.30848	0.271537	0.244231
	-0.0565418	0.131873	0.136425	0.497405	0.22838		0.00356883	0.236067	0.290148	0.404784	0.22839
	0.00020229	0.119103	0.25708	0.404528	0.22838		0.0504283	0.267339	0.290148	0.297987	0.146883
	0.0981824	0.359914	0.32639	0.435085	0.225752		0.206187	0.24917	0.30848	0.404784	0.244231
	-0.0896567	0.27983	0.25708	0.404528	0.22838		-0.0189307	0.267339	0.290148	0.404784	0.244231
	-0.0356437	0.274125	0.290142	0.297989	0.225752		-0.0179329	0.263706	0.30848	0.404784	0.244231
	-0.0124104	0.248289	0.300402	0.297989	0.225752		-0.00547157	0.384318	0.251879	0.271537	0.244231
	0.0858838	0.238296	0.341808	0.271669	0.225752		0.155912	0.182195	0.257083	0.404784	0.244231
	-0.0396075	0.141401	0.211459	0.297989	0.225752		0.0119311	0.288298	0.257083	0.295825	0.225823
	0.0246713	0.237675	0.226119	0.271669	0.225752		-0.00219491	0.279834	0.257083	0.404784	0.22839
	0.00430572	0.115427	0.260002	0.297989	0.146871		-0.0555417	0.0875933	0.211458	0.297987	0.244231
	-0.011728	0.263117	0.211969	0.404528	0.22838		0.0792927	0.272989	0.290148	0.297987	0.225823
	-0.046944	0.268056	0.249652	0.404528	0.22838		0.0148045	0.267339	0.290148	0.297987	0.225823
	0.137588	0.219044	0.25708	0.404528	0.22838		0.192685	0.271576	0.30848	0.271537	0.244231
	-0.0280068	0.343074	0.310184	0.363465	0.225752		0.212909	0.227099	0.30848	0.404784	0.244231
	-0.0211352	0.24975	0.290142	0.404528	0.22838		0.0709257	0.224434	0.212098	0.404784	0.22839
	-0.0241167	0.0921145	0.308455	0.404528	0.244244		0.00681881	0.141741	0.212098	0.404784	0.22839
	0.0384879	0.263686	0.308455	0.404528	0.244244		-0.0364996	0.108939	0.211458	0.404784	0.22839
	0.0543638	0.27983	0.35998	0.220519	0.330351		0.0608904	0.282056	0.329857	0.297987	0.146883
	0.14371	0.286153	0.401287	0.404528	0.22838		0.0730989	0.279834	0.257083	0.404784	0.22839
	-0.0181545	0.245195	0.25708	0.404528	0.22838		0.00183894	0.234849	0.212098	0.404784	0.22839
	0.0752132	0.199853	0.324032	0.404528	0.244244		-0.0350819	0.26853	0.212098	0.404784	0.22839
	0.00799612	0.219044	0.227559	0.404528	0.338246		0.132637	0.229612	0.259845	0.404784	0.22839
	-0.0720964	0.321059	0.324249	0.404528	0.244244		0.0165601	0.26853	0.222668	0.404784	0.22839
	0.0318744	0.263686	0.308455	0.271669	0.244244		0.0422043	0.298988	0.274802	0.404784	0.22839
	0.0722527	0.263686	0.308455	0.404528	0.244244		-0.0462936	0.159085	0.13122	0.271537	0.225823
	0.0407179	0.143961	0.308455	0.220519	0.244244		0.0794496	0.208856	0.257083	0.404784	0.22839
	0.065556	0.219002	0.211969	0.404528	0.22838		-0.00526825	0.125453	0.274802	0.404784	0.22839
	-0.0499713	0.184358	0.211459	0.404528	0.22838		0.0362766	0.295934	0.274802	0.404784	0.22839
	-0.0911513	0.0754193	0.25708	0.404528	0.22838		0.16069	0.244418	0.212098	0.404784	0.22839
	-0.0643751	0.0483612	0.211969	0.404528	0.22838		0.00960394	0.228937	0.30848	0.404784	0.244231
	0.0343811	0.184358	0.211969	0.404528	0.22838		0.0823638	0.179357	0.222668	0.404784	0.244231
	0.116922	0.231088	0.308455	0.404528	0.244244		0.116779	0.150784	0.212098	0.404784	0.22839
	0.00930513	0.219044	0.308455	0.404528	0.244244		0.0476304	0.203024	0.212098	0.404784	0.22839
	0.00113691	0.136824	0.119087	0.15913	0.22838		0.0699247	0.183938	0.212395	0.404784	0.22839
	4.71601e-05	0.257626	0.290142	0.404528	0.22838		-0.0356641	0.0969743	0.257083	0.271537	0.225823
	-0.0248311	0.267333	0.290142	0.404528	0.22838		0.101142	0.222897	0.270522	0.444863	0.22839
	0.0278848	0.133578	0.232874	0.404528	0.22838		0.0749972	0.156942	0.281415	0.404784	0.22839
	-0.0192864	0.109358	0.155864	0.271669	0.244244		-0.0504957	0.279834	0.257083	0.404784	0.22839
	0.130821	0.274053	0.401287	0.271669	0.225752		0.061895	0.279834	0.257083	0.404784	0.22839
	-0.0503839	0.152612	0.308455	0.271669	0.244244		0.0755022	0.123378	0.174013	0.297987	0.34023
	0.197462	0.291024	0.146591	0.271669	0.244244		0.0215454	0.184329	0.218308	0.297987	0.225823
	0.101566	0.148474	0.213562	0.271669	0.225752		0.0509621	0.320014	0.313404	0.220522	0.244231
	0.0198372	0.106247	0.274677	0.458161	0.326945		-0.0057105	0.293345	0.395453	0.404784	0.22839
	-0.014212	0.104947	0.159797	0.220519	-0.185741		0.1068	0.279834	0.30848	0.404784	0.244231
	0.0994923	0.263686	0.308455	0.297989	0.244244		0.00288601	0.256832	0.265237	0.271537	0.244231
	0.0306874	0.231184	0.211459	0.297989	0.225752		-0.0397316	0.133625	0.257083	0.297987	-0.185621
	0.0657844	0.183841	0.137664	0.271669	0.225752		-0.0323189	0.104676	0.211458	0.404784	0.22839
	0.0508528	0.184358	0.25708	0.297989	0.225752		-0.0239023	0.0497811	0.172282	0.253824	0.244231
	0.0602523	0.189244	0.25708	0.297989	0.225752		-0.0172155	0.262337	0.257083	0.297987	0.225823
	-0.0490718	0.27983	0.25708	0.297989	0.225752		0.00754659	0.295934	0.274802	0.297987	0.225823
	0.0639774	0.253806	0.234903	0.297989	-0.143906		-0.0290594	0.184358	0.259845	0.297987	-0.113896
	0.104484	0.251098	0.290142	0.297989	0.146871		0.0698899	0.262337	0.257083	0.297987	0.225823
	0.0286418	0.0868632	0.211969	0.404528	0.22838		0.0733374	0.279834	0.257083	0.297987	0.225823
	-0.0291083	0.227154	0.219487	0.404528	0.22838		-0.0370287	0.136794	0.136425	0.297987	0.225823
	0.0152865	0.274125	0.290142	0.271669	0.225752		0.115953	0.269467	0.289758	0.297987	0.327089
	0.0845695	0.305172	0.290142	0.477394	0.307632		0.214696	0.27352	0.290148	0.404784	0.22839
	0.022884	0.206979	0.308455	0.271669	0.244244		0.0954592	0.261037	0.271778	0.404784	0.22839
	0.0115031	0.263686	0.308455	0.120026	0.244244		-0.0118625	0.258551	0.294028	0.404784	0.22839
	-0.0121477	0.263686	0.308455	0.120026	0.244244		0.000985268	0.279834	0.257083	0.271537	0.327089
	0.0115031	0.263686	0.308455	0.120026	0.244244		-0.0202138	0.279834	0.30848	0.271537	0.244231
	0.134956	0.139033	0.164291	0.294568	0.225752		-0.0192245	0.104676	0.0941185	0.271537	0.225823
	0.143725	0.241814	0.308455	0.297989	0.244244		-0.032228	0.28219	0.30848	0.271537	0.244231
	0.00572459	0.104723	0.211969	0.404528	0.22838		0.106797	0.279834	0.30848	0.271537	0.244231
	-0.0103002	-4.16334e-17	0.132492	0.271669	0.225752		0.0230059	0.279834	0.257083	0.271537	0.244231
	0.0820833	0.27983	0.277171	0.404528	0.22838		0.164777	0.223778	0.30848	0.271537	0.244231
	0.0651097	0.299337	0.275127	0.298213	0.225752		0.0951778	0.263706	0.30848	0.404784	0.244231
	0.0426243	0.178561	0.234158	0.271669	0.244244		-0.0435261	-2.08167e-17	0.31492	0.404784	0.22839
	0.0232386	0.157963	0.226119	0.404528	0.22838		-0.0398819	0.219175	0.212098	0.404784	0.22839
	-0.00599197	0.0943029	0.211969	0.404528	0.22838		-0.00330803	0.219175	0.212098	0.404784	0.22839
	0.032462	0.214763	0.25708	0.404528	0.22838		-0.0124368	0.330855	0.370382	0.404784	0.244231
	-0.0147634	0.27983	0.25708	0.404528	0.22838		-0.00611709	0.279834	0.257083	0.271537	0.225823
	-0.0179617	-4.16334e-17	0.25708	0.220519	0.338246		-0.0359389	0.104676	0.0941185	0.271537	0.225823
	0.00785791	0.27983	0.25708	0.404528	0.22838		0.0353819	0.149936	0.235187	0.297987	0.244231
	0.0299669	0.231088	0.226487	0.404528	0.22838		-0.00551581	0.263706	0.30848	0.404784	0.244231
	0.0338765	0.27983	0.25708	0.220519	0.338246		0.19423	0.211345	0.30848	0.404784	0.244231
	0.033358	0.159748	0.25708	0.404528	0.22838		-0.014319	0.263706	0.30848	0.404784	0.244231
	-0.00168499	0.296092	0.275127	0.404528	0.22838		0.0966562	0.152924	0.134342	0.271537	0.225823
	0.124376	0.202191	0.226487	0.404528	0.22838		0.0919798	0.148495	0.186497	0.271537	0.225823
	0.0961806	0.27983	0.25708	0.404528	0.22838		0.0310424	0.320014	0.313404	0.255235	0.22839
	-0.0185436	0.100491	0.127691	0.404528	0.22838		0.00256109	0.258392	0.247517	0.29424	0.225823
	-0.0375529	0.27983	0.25708	0.404528	0.22838		0.0602692	0.162969	0.211458	0.297987	0.225823
	-0.0744904	0.104723	0.25708	0.404528	0.22838		-0.0122863	0.0996898	0.194612	0.297987	0.34023
	0.0127661	0.280368	0.324032	0.271669	0.326945		-0.0196815	0.267339	0.290148	0.271537	0.225823
	0.0432672	0.221488	0.257237	0.120026	0.244244		-0.00832178	0.267339	0.290148	0.271537	0.225823
	-0.0443451	0.199632	0.259233	0.297989	0.326945		-0.0406473	0.233817	0.257083	0.404784	0.22839
	0.0642709	0.284424	0.306637	0.404528	0.317789		0.0259649	0.233698	0.280886	0.271537	0.225823
	-0.083846	0.343198	0.310184	0.404528	0.22838		0.0900697	0.280772	0.323509	0.297987	0.244231
	-0.0446794	0.219044	0.310184	0.404528	0.22838		0.0377448	0.238344	0.30848	0.297987	0.244231
	-0.0686365	0.0921145	0.211969	0.404528	0.22838		0.012766	0.226773	0.225864	0.297987	0.244231
	0.128555	0.263117	0.211969	0.404528	0.22838		-0.0789757	0.219175	0.212098	0.404784	0.22839
	0.06679	0.282417	0.25708	0.404528	0.22838		0.0284011	0.235768	0.257083	0.404784	0.22839
	0.0102935	0.219044	0.211969	0.404528	0.22838		-0.00122093	0.219175	0.313404	0.404784	0.22839
	0.0850149	0.294824	0.246008	0.404528	0.22838		0.122949	0.23049	0.274802	0.404784	0.22839
	-0.0172756	0.219044	0.25708	0.404528	0.22838		0.0871208	0.279834	0.257083	0.404784	0.22839
	-0.064183	-4.16334e-17	0.211459	0.297989	0.146871		-0.0223566	0.195486	0.212098	0.404784	0.22839
	-0.0276878	0.184358	0.290142	0.297989	0.146871		-0.0148395	0.279834	0.257083	0.404784	0.22839
	-0.0188111	0.184358	0.290142	0.297989	0.146871		-0.0682495	0.279834	0.257083	0.404784	0.22839
	-0.0384465	0.184358	0.211459	0.297989	0.146871		0.148526	0.330043	0.304807	0.343981	0.225823
	0.0205681	0.184358	0.290142	0.297989	0.146871		0.122049	0.295934	0.274802	0.404784	0.22839
	0.0225404	0.140362	0.309379	0.264463	0.326945		0.112838	0.234849	0.212098	0.404784	0.22839
	0.0215656	0.191222	0.226487	0.404528	0.244244		-0.0324549	0.279834	0.257083	0.404784	0.22839
	0.0239497	0.214763	0.270398	0.404528	0.244244		0.0782778	0.222897	0.257083	0.404784	0.22839
	-0.0151226	0.280995	0.308455	0.404528	0.244244		0.0164207	0.279834	0.257083	0.404784	0.22839
	0.023226	0.104723	0.127691	0.404528	0.244244		-0.0181023	0.313904	0.268408	0.404784	0.22839
	0.0652389	0.208891	0.187127	0.404528	0.244244		0.134611	0.320014	0.313404	0.271537	0.22839
	0.000735281	0.0534593	0.136425	0.404528	0.22838		0.127142	0.206738	0.212098	0.404784	0.22839
	0.0431141	0.214763	0.25708	0.404528	0.22838		0.116043	0.288298	0.257083	0.404784	0.22839
	-0.00518164	0.231088	0.226487	0.404528	0.22838		0.00326631	0.279834	0.257083	0.404784	0.22839
	-0.006578	0.219044	0.211969	0.404528	0.22838		-0.000279492	0.219175	0.257083	0.404784	0.22839
	-0.113971	0.0613185	0.211969	0.404528	0.22838		-0.002335	0.219175	0.259845	0.404784	0.22839
	0.025735	0.168272	0.211969	0.404528	0.22838		-0.0181564	0.219175	0.212098	0.404784	0.22839
	0.153975	0.197868	0.211969	0.404528	0.22838		-0.0156728	0.152109	0.257083	0.404784	0.22839
	0.114838	0.171809	0.211969	0.404528	0.22838		-0.0038013	0.208856	0.257083	0.404784	0.22839
	0.000322227	0.192809	0.25708	0.404528	0.22838		-0.0414201	0.267339	0.290148	0.297987	0.146883
	-0.0482874	0.159132	0.25708	0.404528	0.22838		0.0059786	0.23343	0.244729	0.0207386	0.025399
	-0.0298911	0.22449	0.151434	0.404528	0.22838		-0.0278776	0.267339	0.290148	0.297987	0.146883
	0.00639994	0.162464	0.211969	0.404528	0.22838		0.0723953	0.217066	0.265237	0.404784	0.244231
	0.00266081	0.171653	0.309379	0.264463	0.326945		-0.0378804	0.15903	0.236003	0.404784	0.22839
	0.033523	0.22643	0.258438	0.120026	0.244244		0.0516691	0.269832	0.250362	0.404784	0.22839
	0.0664532	0.282417	0.25708	0.404528	0.22838		0.191868	0.267339	0.30848	0.120029	0.244231
	0.0166578	0.282417	0.25708	0.404528	0.22838		0.191868	0.267339	0.30848	0.120029	0.244231
	0.0571132	0.27983	0.25708	0.404528	0.22838		-0.0150685	0.267339	0.30848	0.120029	0.244231
	0.0295402	0.0844777	0.0941621	0.271669	0.225752		-0.0248064	0.279834	0.257083	0.404784	0.22839
	0.0235818	0.1159	0.274677	0.458161	0.22838		0.0381898	0.253319	0.257083	0.404784	0.22839
	0.0534227	0.122515	0.136425	0.404528	0.22838		0.0876394	0.320014	0.313404	0.404784	0.22839
	-0.064732	0.149104	0.211459	0.497405	0.22838		0.105646	0.295442	0.250362	0.404784	0.22839
	-0.023622	0.149834	0.211969	0.404528	0.22838		-0.0076256	0.253548	0.250362	0.404784	0.22839
	-0.0285242	0.23664	0.324032	0.404528	0.244244		-0.067538	0.00671762	0.304807	0.404784	0.22839
	-0.0534248	0.181013	0.187127	0.404528	0.244244		0.15818	0.284912	0.257083	0.404784	0.22839
	0.0493177	0.184358	0.211969	0.404528	0.244244		-0.030313	0.235768	0.257083	0.404784	0.22839
	0.00113453	0.202971	0.25708	0.271669	0.225752		-0.0306921	0.263706	0.30848	0.126875	0.244231
	0.00577986	0.181664	0.309379	0.264463	0.326945		-0.00773866	0.156328	0.309321	0.264411	0.327089
	-0.0279914	0.234074	0.309379	0.264463	0.326945		-0.00518894	0.0902986	0.281549	0.404784	0.22839
	-0.00487429	0.142373	0.219487	0.404528	0.22838		0.150805	0.330855	0.370382	0.494429	0.244231
	-0.0215511	0.114359	0.308455	0.220519	0.244244		0.0635214	0.219264	0.281076	0.404784	0.22839
	-0.0132183	0.174356	0.308455	0.220519	0.244244		-0.0367776	0.0682218	0.211458	0.404784	0.22839
	-0.0305094	0.219044	0.226487	0.404528	0.22838		-0.0473337	0.184358	0.212098	0.404784	0.22839
	0.150499	0.0921145	0.211969	0.404528	0.289135		0.0637728	0.184358	0.212098	0.404784	0.22839
	0.131744	0.203353	0.226991	0.404528	0.244244		0.00873346	0.208352	0.248301	0.404784	0.22839
	-0.046152	0.104723	0.141023	0.271669	0.244244		-0.0449896	0.148495	0.197528	0.271537	0.225823
	0.0794248	0.234074	0.309379	0.264463	0.326945		-0.00908356	0.138448	0.257083	0.271537	0.225823
	0.0862572	0.238036	0.309379	0.264463	0.326945		0.0343349	0.0968724	0.212098	0.404784	0.244231
	-0.08636	0.10128	0.309379	0.264463	0.394204		-0.0277652	0.237141	0.30848	0.404784	0.244231
	0.105109	0.234074	0.309379	0.264463	0.326945		0.0820044	0.110674	0.117066	0.404784	0.22839
	0.116959	0.234074	0.319245	0.264463	0.326945		-0.0481991	0.231087	0.212098	0.404784	0.22839
	-0.00947716	0.234074	0.309379	0.264463	0.326945		0.0806977	0.231974	0.250362	0.404784	0.22839
	0.000327717	0.148474	0.25708	0.404528	0.22838		-0.0679197	0.069161	0.145314	0.404784	0.22839
	-0.00288254	0.104723	0.25708	0.271669	0.225752		0.0872159	0.188343	0.30848	0.404784	0.244231
	-0.0400113	0.299337	0.275127	0.298213	0.225752		-0.0705178	0.263706	0.30848	0.404784	0.244231
	-0.00579237	0.141401	0.25708	0.271669	0.225752		0.0256138	0.219175	0.265237	0.404784	0.244231
	-0.0380195	0.27983	0.25708	0.271669	0.225752		-0.0322826	0.152766	0.290148	0.167987	0.146883
	-0.0327599	-4.16334e-17	0.193004	0.271669	0.225752		0.000310893	0.236067	0.290148	0.297987	0.146883
	-0.00341692	0.104723	0.0941621	0.271669	0.225752		0.074741	0.127098	0.309321	0.264411	0.327089
	0.0929271	0.27983	0.25708	0.271669	0.225752		0.00321753	0.18991	0.212395	0.404784	0.22839
	0.00544269	0.104723	0.0941621	0.271669	0.225752		0.0750342	0.195486	0.270522	0.444863	0.22839
	0.119739	0.27983	0.25708	0.271669	0.225752		0.00281626	0.219175	0.30848	0.404784	0.244231
	0.0253609	0.27983	0.25708	0.271669	0.225752		0.0132485	0.219175	0.212098	0.404784	0.244231
	-0.00814213	0.104723	0.25708	0.271669	0.225752		0.0877328	0.219175	0.265237	0.404784	0.244231
	0.0820062	0.104723	0.0941621	0.271669	0.225752		-0.014162	0.195486	0.30848	0.404784	0.244231
	0.0457536	0.0811167	0.120899	0.15913	-0.231826		0.116897	0.184358	0.211458	0.297987	0.225823
	-0.000691084	0.138982	0.187335	0.297989	0.225752		0.0414287	0.106049	0.101244	0.404784	0.22839
	0.0775498	0.184358	0.211459	0.297989	0.244244		0.0378279	0.226773	0.225864	0.272886	0.244231
	0.173999	0.231161	0.234158	0.297989	0.244244		0.152114	0.26621	0.30848	0.404784	0.244231
	0.0156779	0.184358	0.308455	0.297989	0.244244		0.0109726	0.158143	0.211458	0.404784	0.22839
	-0.00531032	0.104723	0.164291	0.294568	0.225752		0.0298956	0.11502	0.127296	0.271537	0.225823
	-0.0566493	0.280874	0.324032	0.297989	0.244244		-6.66813e-06	0.209493	0.2328	0.404784	0.22839
	0.0950766	0.184358	0.211459	0.297989	0.244244		-0.00834655	0.219175	0.212098	0.404784	0.22839
	-0.00046171	0.27983	0.25708	0.220519	0.244244		0.00532725	0.172542	0.281415	0.404784	0.22839
	0.126009	0.386183	0.266864	0.250002	0.244244		0.0362751	0.219175	0.212098	0.404784	0.22839
	-0.0535839	0.27983	0.25708	0.220519	0.244244		0.0139561	0.131054	0.136425	0.404784	0.22839
	0.0590009	0.174356	0.308455	0.220519	0.244244		0.0541143	0.136825	0.211458	0.297987	0.34023
	-0.0297433	0.27983	0.308455	0.220519	0.244244		-0.0389463	0.104676	0.212395	0.404784	0.22839
	0.15619	0.386183	0.266864	0.250002	0.244244		-0.00470603	0.104676	0.270522	0.444863	0.22839
	0.15619	0.386183	0.266864	0.250002	0.244244		0.17959	0.219175	0.212098	0.404784	0.22839
	-0.00800697	0.263686	0.308455	0.220519	0.244244		0.0181355	0.210755	0.212098	0.404784	0.22839
	0.0550034	0.27983	0.25708	0.220519	0.244244		-0.0146236	0.258483	0.212395	0.404784	0.22839
	-0.0186502	0.109358	0.308455	0.220519	0.244244		0.00138515	0.279834	0.257083	0.404784	0.22839
	-0.00800697	-4.16334e-17	-7.63278e-17	0.0851111	0.0282746		-0.00487649	0.279834	0.257083	0.404784	0.22839
	0.15619	0.286153	0.401287	0.0851111	0.0282746		-0.0737493	0.119059	0.211458	0.404784	0.22839
	-0.0457332	0.27983	0.25708	0.220519	0.244244		0.0127133	0.219175	0.212098	0.404784	0.22839
	0.0563526	0.27983	0.308455	0.220519	0.244244		0.119002	0.279433	0.30848	0.404784	0.244231
	0.00353579	0.197892	0.308455	0.220519	0.244244		0.0718909	0.219175	0.212098	0.404784	0.244231
	0.116715	0.27983	0.308455	0.220519	0.244244		0.194589	0.328365	0.370382	0.278017	0.244231
	-0.0218706	0.27983	0.25708	0.297989	0.0449519		-0.0342851	0.328668	0.290631	0.404784	0.322682
	0.0581785	0.21092	0.143607	0.297989	0.225752		0.0268959	0.104676	0.212098	0.404784	0.244231
	0.0940886	0.11799	0.211459	0.297989	0.326945		0.0231383	0.249735	0.259845	0.271537	0.225823
	-0.0135692	0.267333	0.290142	0.404528	0.22838		-0.0508541	0.28219	0.257083	0.271537	0.225823
	0.0043469	0.219044	0.290142	0.404528	0.22838		-0.0234147	0.268845	0.274802	0.271537	0.225823
	-5.86429e-05	0.267333	0.290142	0.404528	0.22838		-0.0508824	0.279834	0.257083	0.271537	0.225823
	-0.0241579	0.0675101	0.193004	0.271669	0.225752		-0.0406709	0.251647	0.257083	0.271537	0.225823
	-0.0104933	0.0887821	0.211459	0.297989	0.225752		-0.0555954	0.108037	0.0941185	0.271537	0.225823
	-0.0139943	0.189244	0.211459	0.297989	0.225752		-0.0220768	0.240958	0.228687	0.271537	0.225823
	0.0947229	0.219044	0.211969	0.404528	0.22838		0.00296083	0.115437	0.257083	0.271537	0.225823
	0.0143761	0.104723	0.129087	0.271669	0.225752		-0.0489985	0.279834	0.257083	0.271537	0.225823
	-0.0193597	0.27983	0.25708	0.271669	0.225752		0.0503605	0.240958	0.228687	0.271537	0.225823
	0.0747686	0.108939	0.211459	0.297989	0.244244		0.122252	0.262337	0.257083	0.271537	0.225823
	0.12368	0.236856	0.211969	0.404528	0.244244		-0.010773	0.279834	0.257083	0.271537	0.225823
	0.0305576	0.22441	0.306637	0.404528	0.317789		-0.025053	0.104676	0.257083	0.271537	0.225823
	0.00808249	0.27983	0.308455	0.220519	0.244244		0.0112884	0.279834	0.257083	0.271537	0.225823
	0.105818	0.263686	0.308455	0.220519	0.244244		-0.0508824	0.0599383	0.257083	0.271537	0.225823
	-0.038845	0.277435	0.268306	0.404528	0.22838		0.00563654	0.104676	0.0941185	0.271537	0.225823
	-0.045771	0.234074	0.309379	0.404528	0.22838		-0.0113191	0.240958	0.228687	0.271537	0.225823
	-0.0387297	0.27983	0.25708	0.297989	-0.185741		-0.00110757	0.251647	0.257083	0.271537	0.225823
	-0.0350249	0.27983	0.25708	0.297989	-0.185741		0.107157	0.160962	0.228687	0.271537	0.225823
	0.0442183	0.182306	0.335901	0.367141	-0.185741		-0.0747248	0.226542	0.30848	0.404784	0.244231
	0.0816105	0.27983	0.25708	0.297989	-0.185741		-0.0352139	0.226542	0.30848	0.404784	0.244231
	-0.0196566	0.27983	0.25708	0.297989	-0.185741		0.0411924	0.184358	0.211458	0.404784	0.244231
	0.0153341	0.177036	0.137664	0.0149424	-0.393586		-0.0283956	0.148495	0.186497	0.297987	0.044939
	-0.00799301	0.256084	0.25708	0.297989	-0.185741		0.0472414	0.172635	0.211458	0.297987	0.225823
	-0.0620568	0.27983	0.25708	0.297989	-0.185741		0.0686374	0.234269	0.309321	0.264411	0.327089
	0.0663447	0.184358	0.211459	0.297989	-0.185741		0.0856106	0.234031	0.309321	0.264411	0.327089
	0.00792449	0.184358	0.25708	0.297989	-0.185741		-0.0492727	0.127098	0.116241	0.264411	0.327089
	0.0780082	0.184358	0.211459	0.297989	-0.185741		0.140995	0.234031	0.309321	0.264411	0.327089
	-0.0737203	0.27983	0.25708	0.297989	-0.185741		-0.0644585	0.104582	0.309321	0.264411	0.327089
	0.147989	0.27983	0.25708	0.297989	-0.185741		-0.0206884	0.156328	0.309321	0.264411	0.327089
	0.0546811	0.108939	0.211459	0.297989	-0.185741		-0.021171	0.140336	0.309321	0.264411	0.327089
	-0.0387297	0.0822585	0.288496	0.297989	-0.185741		0.095749	0.206622	0.212098	0.404784	0.22839
	0.000617356	0.0967035	0.25708	0.297989	-0.185741		-0.0723517	0.293345	0.395453	0.126875	0.044939
	0.0558819	0.129607	0.136425	0.297989	-0.185741		0.135941	0.196976	0.30848	0.494429	0.244231
	0.0780082	0.256084	0.25708	0.297989	-0.185741		0.0602065	0.299601	0.212098	0.404784	0.244231
	0.108459	0.108939	0.211459	0.297989	0.225752		-0.0290328	0.330855	0.370382	0.404784	0.244231
	-0.0419532	0.237675	0.25708	0.271669	0.225752		-0.099879	0.245641	0.359581	0.272886	0.329056
	-0.0517743	0.168272	0.211969	0.404528	0.22838		0.0725973	0.219175	0.212098	0.404784	0.244231
	0.0220715	0.184358	0.211459	0.404528	0.22838		0.0621408	0.263706	0.30848	0.404784	0.244231
	0.0216056	0.184358	0.211969	0.404528	0.22838		0.0310868	0.131546	0.212098	0.404784	0.22839
	0.0143992	0.148474	0.18647	0.404528	0.22838		0.00983167	0.245641	0.359581	0.297987	0.329056
	0.00267826	0.162623	0.189832	0.404528	0.22838		-0.0225102	0.164063	0.211458	0.297987	0.225823
	-0.0627489	0.263686	0.308455	0.404528	0.244244		0.0484248	0.152318	0.222668	0.494429	0.22839
	-0.0205756	0.265672	0.308455	0.404528	0.244244		0.0697676	0.177978	0.222668	0.404784	0.22839
	-0.0611382	0.219044	0.308455	0.404528	0.244244		0.0577592	0.195486	0.212098	0.404784	0.22839
	0.00503433	0.0594755	0.211969	0.404528	0.317789		0.0201105	0.171475	0.149308	0.404784	0.34023
	-0.035055	0.265672	0.308455	0.404528	0.244244		-0.0350939	0.184358	0.257083	0.297987	-0.185621
	-0.0129184	0.168127	0.211969	0.404528	0.244244		-0.0113034	0.187822	0.257083	0.297987	-0.185621
	0.133164	0.19664	0.187127	0.404528	0.244244		0.0838588	0.279834	0.257083	0.297987	-0.185621
	0.0376865	0.201704	0.308455	0.404528	0.244244		-0.0588845	0.213336	0.257083	0.297987	-0.185621
	-0.0048809	0.0682524	0.308455	0.404528	0.244244		-0.0193953	-2.08167e-17	0.211458	0.297987	-0.185621
	0.0352389	0.263686	0.308455	0.150301	0.338246		-0.0505673	0.279834	0.257083	0.297987	-0.185621
	0.013071	0.104723	0.35998	0.271669	0.330351		0.0838588	0.279834	0.257083	0.297987	-0.185621
	0.071002	0.2399	0.374108	0.271669	0.330351		-0.0243913	0.184358	0.257083	0.297987	-0.185621
	-0.0224863	0.104723	0.308455	0.404528	0.244244		-0.0130765	0.279834	0.257083	0.297987	-0.185621
	-0.0241057	0.159132	0.192052	0.220519	-0.185741		0.030346	0.213336	0.257083	0.297987	-0.185621
	0.0882829	0.219044	0.273479	0.404528	0.242254		0.0392754	0.269467	0.289758	0.297987	-0.185621
	-0.017662	0.148474	0.300402	0.154256	0.225752		0.120042	0.279834	0.257083	0.220522	-0.185621
	-0.0148776	0.283674	0.311012	0.404528	0.22838		0.0838588	0.279834	0.257083	0.297987	-0.185621
	-0.0076095	0.257927	0.290142	0.404528	0.22838		0.0691661	0.238428	0.138008	0.271937	0.225823
	-0.0784883	0.256084	0.25708	0.404528	0.326945		-0.0215315	0.184358	0.211458	0.297987	0.225823
	0.0267797	0.168272	0.211969	0.404528	0.22838		-0.0240274	0.0992824	0.211458	0.297987	0.225823
	0.0508623	0.104723	0.173486	0.271669	0.338246		-0.0122003	-2.08167e-17	0.30848	0.15578	0.34023
	-0.00831618	0.0594755	0.211969	0.404528	0.22838		0.063289	0.293345	0.395453	0.103948	0.00276655
	-0.0264362	0.104723	0.0941621	0.271669	0.225752		-0.0477527	0.279834	0.30848	0.220522	0.244231
	-0.0720411	0.151805	0.211969	0.404528	0.22838		-0.000349487	-2.08167e-17	0.251879	0.253824	0.244231
	0.00679862	0.219044	0.211969	0.404528	0.22838		0.0689125	0.263706	0.30848	0.220522	0.244231
	-0.0423645	0.214763	0.211969	0.404528	0.22838		0.0495637	0.279834	0.30848	0.220522	0.244231
	0.102954	0.219044	0.211969	0.404528	0.22838		-0.0583644	0.279834	0.30848	0.220522	0.244231
	0.026235	0.184358	0.211969	0.404528	0.22838		0.0614145	0.170265	0.30848	0.220522	0.244231
	0.061318	0.219044	0.211969	0.404528	0.22838		0.094457	0.279834	0.257083	0.220522	0.244231
	-0.0168329	0.184358	0.211969	0.404528	0.22838		0.063289	0.293345	0.395453	0.103948	0.00276655
	-0.0463596	0.231088	0.226487	0.404528	0.22838		-0.0346628	0.134812	0.30848	0.220522	0.244231
	-0.00723545	0.104723	0.286839	0.404528	0.22838		-0.0319951	0.219175	0.212395	0.404784	0.22839
	0.0596593	0.219044	0.211969	0.404528	0.22838		0.00524092	0.219175	0.212098	0.404784	0.22839
	0.120828	0.122515	0.136425	0.404528	0.22838		0.0053566	0.184358	0.211458	0.297987	0.244231
	-0.00830272	0.184358	0.211969	0.404528	0.22838		-0.0389558	0.140897	0.136425	0.297987	0.244231
	0.0519941	0.241589	0.211969	0.404528	0.22838		-0.013087	0.263706	0.30848	0.297987	0.244231
	0.0701806	0.237618	0.211459	0.497405	0.22838		0.0306131	0.131546	0.162398	0.302176	0.225823
	-0.100592	0.219044	0.211969	0.404528	0.22838		0.0454132	0.184358	0.30848	0.297987	0.244231
	0.0142235	0.145513	0.211969	0.404528	0.22838		0.0729868	0.104676	0.211458	0.297987	0.244231
	0.100943	0.219044	0.211969	0.404528	0.22838		-0.022457	0.208235	0.265237	0.297987	0.244231
	0.108257	0.206859	0.211969	0.404528	0.22838		-0.0389558	0.119077	0.30848	0.297987	0.244231
	0.0894333	0.201704	0.211969	0.404528	0.22838		0.182044	0.263415	0.30848	0.297987	0.244231
	-0.0218556	0.191222	0.226487	0.404528	0.22838		-0.0364048	0.229738	0.30848	0.297987	0.244231
	0.0232251	0.191222	0.226487	0.404528	0.22838		0.108377	0.282033	0.318168	0.297987	0.244231
	0.0269472	0.234074	0.309379	0.264463	0.326945		0.0391056	0.263706	0.30848	0.297987	0.244231
	0.0136936	0.234074	0.309379	0.264463	0.326945		-0.0453352	0.279834	0.257083	0.271537	0.225823
	-0.0847907	0.234074	0.309379	0.264463	0.326945		0.0719323	0.28219	0.257083	0.271537	0.225823
	0.0635016	0.234074	0.309379	0.264463	0.326945		-0.0543414	0.184358	0.211458	0.297987	0.244231
	0.043927	0.00805049	0.202662	0.264463	0.326945		-0.0104755	0.148495	0.290148	0.404784	0.22839
	0.0552945	0.181664	0.309379	0.264463	0.326945		0.078212	0.279834	0.257083	0.404784	0.22839
	0.0101559	0.159115	0.309379	0.264463	0.394204		0.00122841	0.234269	0.309321	0.264411	0.327089
	0.0392577	0.122781	0.309379	0.264463	0.326945		-0.0257076	0.123233	0.166811	0.264411	0.327089
	-0.0314919	0.234074	0.309379	0.264463	0.326945		0.0671019	0.234031	0.309321	0.264411	0.327089
	0.0767551	0.238036	0.309379	0.264463	0.326945		-0.024007	0.125127	0.270522	0.444863	0.22839
	-0.00215463	0.100131	0.309379	0.264463	0.326945		0.0127492	0.171081	0.289758	0.297987	-0.0955746
	-0.0271529	0.0956429	0.309379	0.264463	0.326945		-0.0212169	0.104676	0.210029	0.271537	0.244231
	-0.0767722	0.145981	0.309379	0.264463	0.326945		0.112431	0.204504	0.30848	0.404784	0.244231
	0.0812358	0.145981	0.309379	0.264463	0.326945		0.0860355	0.184358	0.229264	0.297987	0.319132
	0.162929	0.234074	0.309379	0.264463	0.326945		-0.0180871	-2.08167e-17	-4.85723e-17	0.271937	-0.466121
	0.0146366	0.234074	0.309379	0.264463	0.326945		0.011622	0.146267	0.238001	0.220522	-0.185621
	0.0592094	0.238036	0.309379	0.264463	0.326945		-0.0266572	0.152545	0.221892	0.220522	0.244231
	0.0720858	0.145981	0.309379	0.264463	0.326945		-0.0159945	0.263706	0.30848	0.297987	0.244231
	-0.0678108	0.0672595	0.309379	0.264463	0.326945		-0.0192587	0.263706	0.30848	0.297987	0.244231
	0.0193059	0.171653	0.309379	0.264463	0.326945		-0.0515741	0.121255	0.211458	0.297987	0.244231
	0.059398	0.234074	0.309379	0.264463	0.326945		0.0841343	0.263706	0.30848	0.297987	0.244231
	0.0549173	0.234074	0.309379	0.264463	0.326945		0.0449362	0.184358	0.30848	0.297987	0.244231
	0.130101	0.234074	0.309379	0.264463	0.326945		-0.0267925	0.288123	0.323509	0.271537	0.244231
	-0.0683766	0.234074	0.309379	0.264463	0.326945		-0.0487324	0.117338	0.212098	0.404784	0.22839
	0.0224664	0.234074	0.309379	0.264463	0.326945		-0.051575	0.189354	0.211458	0.404784	0.22839
	0.0812233	0.118053	0.166835	0.264463	0.326945		-0.0204	0.267339	0.290148	0.404784	0.22839
	-0.0687593	0.0817048	0.309379	0.264463	0.326945		-0.0149589	0.219175	0.290148	0.404784	0.22839
	0.121692	0.234074	0.309379	0.264463	0.326945		-0.0204	0.278284	0.290327	0.404784	0.22839
	-0.0576762	0.158496	0.309379	0.264463	0.326945		0.0228498	0.239112	0.290148	0.404784	0.22839
	0.103006	0.152149	0.226487	0.404528	0.22838		0.107309	0.24917	0.260987	0.404784	0.22839
	0.0127513	0.219044	0.211969	0.404528	0.22838		0.00516634	0.267339	0.290148	0.404784	0.22839
	0.0292185	0.168272	0.211969	0.497405	0.22838		-0.0326424	0.24917	0.260987	0.404784	0.22839
	0.0455461	0.121075	0.226487	0.404528	0.22838		-0.00611719	0.267339	0.290148	0.404784	0.22839
	-0.010572	0.104723	0.308455	0.404528	0.244244		-0.0204	0.267339	0.290148	0.404784	0.22839
	0.0627444	0.166968	0.258438	0.404528	0.244244		0.0174088	0.289401	0.318803	0.120029	0.22839
	-0.0530177	0.219044	0.211969	0.404528	0.22838		-0.0142788	0.267339	0.290148	0.404784	0.22839
	-0.0251927	0.256224	0.25708	0.345368	0.17886		0.201011	0.267339	0.290148	0.404784	0.22839
	-0.0575734	0.245456	0.25708	0.404528	0.22838		-0.01308	0.119125	0.309321	0.264411	0.327089
	-0.0295812	0.27983	0.25708	0.220519	0.22838		0.0438977	0.199726	0.309321	0.264411	0.327089
	0.0108289	0.0921145	0.211969	0.404528	0.22838		0.0254903	0.234031	0.309321	0.264411	0.327089
	0.11837	0.27983	0.25708	0.404528	0.22838		-0.0481206	0.234031	0.309321	0.264411	0.327089
	-0.0136193	0.232681	0.211969	0.404528	0.22838		0.0690068	0.123233	0.20397	0.264411	0.327089
	0.00181896	0.23227	0.211969	0.404528	0.22838		-0.0471276	0.090252	0.309321	0.264411	0.327089
	-0.0646912	0.128159	0.211459	0.297989	0.225752		-0.0362098	0.234031	0.309321	0.264411	0.327089
	0.0752334	0.214918	0.143607	0.297989	0.225752		-0.0123883	0.199726	0.309321	0.264411	0.327089
	0.0237556	0.128159	0.211459	0.297989	0.225752		-0.0600314	0.0686436	0.309321	0.264411	0.327089
	0.00727576	0.184358	0.211459	0.297989	0.225752		0.0511397	0.208984	0.309321	0.264411	0.394915
	-0.0290965	0.184358	0.211459	0.297989	0.225752		-0.0391871	0.121785	0.309321	0.264411	0.327089
	0.0219494	0.184358	0.211459	0.297989	0.225752		-0.022313	0.234031	0.309321	0.264411	0.327089
	-0.0622876	0.104723	0.127691	0.404528	0.22838		-0.00444776	0.107611	0.314279	0.264411	0.327089
	0.116482	0.263686	0.308455	0.404528	0.244244		0.0888581	0.234031	0.309321	0.264411	0.327089
	0.156327	0.225052	0.308455	0.27817	0.244244		-0.0312446	0.100112	0.309321	0.264411	0.327089
	-0.0145558	0.141829	0.248513	0.27817	0.244244		-0.0391851	0.234031	0.309321	0.264411	0.327089
	0.149036	0.263686	0.308455	0.404528	0.244244		0.0809138	0.234031	0.309321	0.264411	0.327089
	0.00727745	0.219044	0.308455	0.404528	0.244244		0.0353786	0.263706	0.30848	0.271537	0.244231
	-0.00730226	-4.16334e-17	0.0933889	0.271669	0.225752		-0.078014	0.219777	0.309321	0.297987	0.225823
	-0.00610778	0.122515	0.136425	0.404528	0.22838		0.0312473	0.219175	0.212098	0.494429	0.22839
	-0.082419	0.15333	0.309379	0.264463	0.326945		0.0354376	0.184358	0.211458	0.297987	0.225823
	-0.0225076	0.0405022	0.309379	0.297989	0.225752		0.00150772	0.184358	0.211458	0.297987	0.225823
	0.0597757	0.131563	0.211969	0.404528	0.22838		0.11691	0.138016	0.211458	0.297987	0.225823
	0.0762257	0.27983	0.25708	0.29948	-0.0957949		0.0182937	0.155951	0.183244	0.271537	0.327089
	-0.0289682	0.104723	0.290142	0.271669	0.225752		-0.0414082	0.12965	0.281076	0.271537	0.225823
	-0.0255858	0.267333	0.290142	0.271669	0.225752		-0.0237833	0.104676	0.30848	0.271537	0.244231
	-0.0196667	0.267333	0.290142	0.271669	0.225752		0.0666044	0.0897138	0.212098	0.404784	0.22839
	-0.0196667	0.262938	0.290142	0.271669	0.225752		0.0576416	0.219175	0.212098	0.404784	0.22839
	-0.0188211	0.267333	0.290142	0.271669	0.225752		-0.0437824	0.184358	0.211458	0.404784	0.22839
	0.20186	0.267333	0.290142	0.271669	0.225752		0.0254675	0.11502	0.127296	0.109478	0.225823
	-0.0255858	0.267333	0.290142	0.271669	0.225752		0.0272052	0.108939	0.212098	0.404784	0.22839
	-0.0492935	0.104723	0.0941621	0.271669	0.225752		0.00702844	0.114755	0.212098	0.404784	0.22839
	0.0645626	0.163032	0.211969	0.404528	0.22838		0.0309055	0.131054	0.136425	0.404784	0.22839
	-0.0102826	0.267333	0.290142	0.404528	0.326945		0.0190436	0.0869345	0.116698	0.404784	0.22839
	0.0282233	0.219044	0.25708	0.404528	0.22838		0.0167925	0.12306	0.281415	0.404784	0.22839
	0.154331	0.294824	0.246008	0.404528	0.22838		-0.0223892	0.104676	0.211458	0.404784	0.22839
	0.154331	0.343074	0.310184	0.363465	-0.0875958		0.072398	0.15328	0.212098	0.404784	0.22839
	-0.0197215	0.0921145	0.211969	0.404528	0.22838		0.0967742	0.219175	0.212098	0.404784	0.22839
	-0.0253476	0.27983	0.25708	0.404528	0.22838		-0.00993733	0.15328	0.212098	0.404784	0.22839
	0.0082671	0.168272	0.25708	0.404528	0.22838		-0.03942	0.168373	0.212098	0.404784	0.22839
	0.00681645	0.219002	0.211969	0.404528	0.22838		0.0294653	0.0869345	0.116698	0.404784	0.22839
	-0.00524938	0.0921145	0.211969	0.404528	0.22838		-0.0206014	0.219175	0.212098	0.404784	0.22839
	-0.0197215	0.245195	0.25708	0.404528	0.22838		0.0193992	0.171273	0.211458	0.494429	0.22839
	0.00858565	0.168272	0.211969	0.404528	0.22838		-0.0405618	0.104676	0.212098	0.404784	0.22839
	-0.0152275	0.27983	0.25708	0.404528	0.22838		-0.0341022	0.0942607	0.212098	0.404784	0.22839
	-0.00139244	0.219044	0.25708	0.404528	0.22838		0.0456325	0.0969743	0.0998587	0.271537	0.225823
	0.0064979	0.282417	0.25708	0.404528	0.22838		-0.0327414	0.104676	0.212098	0.404784	0.22839
	0.0853326	0.27983	0.25708	0.404528	0.22838		0.00565599	0.0473907	0.116698	0.404784	0.22839
	0.0206515	0.27983	0.25708	0.404528	0.22838		0.0131715	0.112128	0.222668	0.404784	0.22839
	-0.0253476	0.27983	0.25708	0.404528	0.22838		0.121926	0.184358	0.212098	0.404784	0.22839
	0.150793	0.343074	0.310184	0.363465	-0.0875958		-0.0585979	0.114755	0.212098	0.404784	0.22839
	-0.0116891	0.27983	0.25708	0.404528	0.22838		0.0312441	0.136825	0.212098	0.404784	0.22839
	-0.02004	0.209352	0.25708	0.404528	0.22838		0.0586108	0.170713	0.212098	0.404784	0.244231
	-0.0152275	0.27983	0.25708	0.404528	0.22838		-0.0169259	0.310286	0.291175	0.404784	0.244231
	-0.0152275	0.27983	0.25708	0.404528	0.22838		0.195365	0.271129	0.30848	0.404784	0.244231
	-0.0409519	0.224516	0.25708	0.404528	0.22838		0.0793281	0.219175	0.30848	0.404784	0.244231
	-0.0346886	0.27983	0.25708	0.404528	0.22838		-0.00774009	0.310286	0.291175	0.404784	0.244231
	-0.0253476	0.27983	0.25708	0.404528	0.22838		0.0371801	0.263706	0.30848	0.404784	0.244231
	0.120039	0.27983	0.25708	0.404528	0.22838		-0.0137527	0.00966406	0.0363975	0.404784	0.244231
	0.117178	0.263117	0.151434	0.404528	0.22838		0.0210795	0.0682218	0.0941185	0.278017	0.244231
	0.154331	0.263117	0.151434	0.404528	0.22838		-0.0108146	0.26621	0.30848	0.404784	0.244231
	0.0565304	0.27983	0.25708	0.404528	0.22838		0.00869955	0.168361	0.230998	0.122004	0.34023
	0.0835634	0.27983	0.25708	0.404528	0.22838		-0.0285699	0.219175	0.323509	0.404784	0.244231
	-0.00524938	0.219044	0.211969	0.404528	0.22838		-0.021084	0.104676	0.359581	0.271537	0.329056
	-0.0167632	0.219044	0.25708	0.404528	0.22838		0.00991388	0.219175	0.225864	0.404784	0.244231
	0.131332	0.27983	0.25708	0.404528	0.22838		0.117363	0.330855	0.370382	0.278017	0.244231
	-0.0391827	-4.16334e-17	-7.63278e-17	0.220519	0.22838		-0.0208897	0.279433	0.30848	0.404784	0.244231
	-0.0359628	0.219044	0.211969	0.404528	0.22838		-0.0328955	0.263706	0.30848	0.122004	0.34023
	-0.00701857	0.219044	0.25708	0.404528	0.22838		-0.00859982	0.263706	0.30848	0.404784	0.244231
	-0.0771493	0.294824	0.246008	0.404528	0.22838		-0.0356675	0.219175	0.30848	0.404784	0.244231
	-0.00139244	0.219044	0.25708	0.404528	0.22838		0.0193797	0.128954	0.168358	0.122004	0.34023
	0.0853326	0.27983	0.25708	0.404528	0.22838		0.182773	0.226542	0.30848	0.404784	0.244231
	-0.00670002	0.219044	0.25708	0.404528	0.22838		0.0891893	0.245641	0.359581	0.271537	0.329056
	0.00214596	0.27983	0.25708	0.404528	0.22838		-0.00792296	0.245641	0.359581	0.271537	0.329056
	-0.0264797	-4.16334e-17	-7.63278e-17	0.363465	0.22838		0.0262199	0.100941	0.212098	0.404784	0.244231
	0.0224207	0.0594755	0.211969	0.404528	0.22838		0.120583	0.188343	0.30848	0.404784	0.244231
	-0.0359628	0.27983	0.25708	0.404528	0.22838		0.00202125	0.330855	0.370382	0.278017	0.244231
	-0.0629958	0.192809	0.25708	0.404528	0.22838		0.100102	0.263706	0.30848	0.404784	0.244231
	-0.0629958	0.219002	0.211969	0.404528	0.22838		0.0223798	0.100941	0.212098	0.404784	0.244231
	-0.00491607	0.343074	0.310184	0.363465	0.22838		0.0310872	0.141493	0.212098	0.404784	0.244231
	-0.0700726	0.282417	0.25708	0.404528	0.22838		0.179526	0.263415	0.30848	0.404784	0.244231
	-0.0494793	0.219044	0.25708	0.404528	0.22838		-0.0363585	0.263706	0.30848	0.404784	0.244231
	0.154331	0.263117	0.151434	0.404528	0.22838		0.00583884	0.245641	0.359581	0.271537	0.329056
	0.133101	0.27983	0.25708	0.404528	0.22838		-0.0287866	0.219175	0.30848	0.404784	0.244231
	0.150793	0.245195	0.25708	0.404528	0.22838		0.0270075	0.263706	0.30848	0.404784	0.244231
	0.0632886	0.27983	0.25708	0.404528	0.22838		0.0358123	0.263706	0.30848	0.404784	0.244231
	-0.0530177	0.294824	0.246008	0.404528	0.22838		0.0206504	0.263706	0.30848	0.404784	0.244231
	0.150793	0.343074	0.310184	0.363465	-0.0875958		-0.0825225	0.280772	0.323509	0.404784	0.244231
	-0.0111941	-4.16334e-17	0.153034	0.363465	-0.0875958		-0.0186215	0.33553	0.370382	0.278017	0.244231
	0.0224207	0.0594755	0.211969	0.404528	0.22838		0.101414	0.219175	0.212098	0.404784	0.22839
	0.150793	0.294824	0.246008	0.404528	0.22838		0.0183653	0.0942607	0.116698	0.404784	0.22839
	0.0774422	0.282417	0.25708	0.404528	0.22838		-0.0386968	0.104676	0.109162	0.404784	0.22839
	0.0193773	0.27983	0.25708	0.404528	0.22838		-0.057239	0.279834	0.257083	0.297987	0.327089
	-0.0680643	0.148474	0.211969	0.404528	0.22838		0.0347302	0.235768	0.257083	0.404784	0.22839
	0.0561757	0.197868	0.211969	0.404528	0.22838		0.0111285	0.163842	0.275764	0.339715	0.175111
	-0.0689228	0.219044	0.211969	0.404528	0.22838		0.091978	0.279834	0.257083	0.220522	0.22839
	-0.00753173	0.168272	0.211969	0.404528	0.22838		-0.0192738	0.219175	0.212098	0.404784	0.22839
	0.123468	0.221056	0.211969	0.404528	0.22838		0.015072	0.0127281	0.313404	0.220522	0.22839
	0.009251	0.110343	0.211969	0.404528	0.22838		0.00124032	0.231953	0.30848	0.404784	0.244231
	-0.00337293	0.104723	0.3634	0.271669	0.244244		0.0217465	0.168373	0.212098	0.404784	0.327089
	-0.0450697	0.21875	0.279772	0.404528	0.330351		-0.0320786	0.123233	0.395453	0.404784	0.327089
	0.0690028	0.104723	0.137421	0.271669	0.244244		0.058338	0.249353	0.395453	0.404784	0.327089
	0.0489963	0.162159	0.118526	0.271669	0.244244		-0.0231273	0.196079	0.222668	0.404784	0.22839
	0.0982488	0.263686	0.308455	0.271669	0.244244		-0.0388222	0.107807	0.212098	0.404784	0.22839
	-0.0120355	0.104723	0.096094	0.271669	0.326945		0.0135509	0.234004	0.202727	0.494429	0.34023
	0.0048385	0.219044	0.211969	0.404528	0.22838		-0.0415886	0.104676	0.0941185	0.404784	0.22839
	0.0355837	0.184358	0.211969	0.404528	0.22838		0.0593614	0.219175	0.212098	0.404784	0.22839
	0.00959992	0.0921145	0.211969	0.404528	0.22838		-0.055477	0.199019	0.222668	0.404784	0.22839
	-0.0794764	0.172635	0.211459	0.404528	0.22838		0.0727177	0.157561	0.222668	0.404784	0.22839
	-0.00458608	0.219044	0.211969	0.404528	0.22838		-0.0282397	0.219175	0.222668	0.404784	0.22839
	0.117668	0.219044	0.211969	0.404528	0.22838		0.0801135	0.0978314	0.212098	0.404784	0.34023
	0.0343479	0.219044	0.211969	0.404528	0.22838		-0.0195203	0.227001	0.222668	0.404784	0.22839
	0.0703042	0.264742	0.219487	0.404528	0.22838		-0.0297439	0.219175	0.212098	0.404784	0.34023
	-0.0507114	0.219044	0.211969	0.404528	0.22838		0.0686278	0.234004	0.222668	0.494429	0.22839
	0.0891826	0.13967	0.19439	0.304506	0.338246		0.0213671	0.213139	0.212098	0.404784	0.22839
	0.0754013	0.219906	0.25708	0.271669	0.225752		0.0526317	0.219175	0.212098	0.404784	0.22839
	-0.0214751	0.250432	0.202893	0.249379	0.225752		-0.0186424	0.104676	0.290148	0.271537	0.225823
	0.0736142	0.148474	0.18647	0.271669	0.225752		-0.0186424	0.104676	0.290148	0.271537	0.225823
	0.00635772	0.273374	0.25708	0.271669	0.225752		-0.0274512	0.267339	0.290148	0.271537	0.225823
	-0.0164385	0.249714	0.25708	0.271669	0.225752		-0.00895275	0.104676	0.290148	0.271537	0.225823
	0.0156007	0.184358	0.211459	0.297989	0.225752		0.0174787	0.104676	0.0941185	0.271537	0.225823
	-0.0727663	0.0155468	0.0941621	0.271669	0.225752		-0.0274512	0.267339	0.290148	0.271537	0.225823
	0.00526879	0.184358	0.211459	0.297989	0.22838		-0.0115954	-2.08167e-17	0.290148	0.271537	0.225823
	0.0586504	0.109151	0.187335	0.297989	0.225752		0.0113125	0.104676	0.0941185	0.271537	0.225823
	-0.00186804	0.184358	0.211459	0.297989	0.225752		-0.0186424	0.267339	0.290148	0.271537	0.225823
	-0.0404888	0.122893	0.127691	0.404528	0.22838		0.0192404	0.104676	0.290148	0.271537	0.225823
	0.123422	0.219044	0.211969	0.404528	0.22838		0.0157169	0.267339	0.290148	0.271537	0.225823
	-0.0380718	0.201704	0.211969	0.404528	0.22838		0.0323336	0.275329	0.283816	0.404784	0.22839
	0.121076	0.113551	0.211969	0.404528	0.22838		-0.014056	0.108037	0.0941185	0.404784	0.22839
	0.0826697	0.11549	0.0980992	0.404528	0.22838		-0.0407008	0.158885	0.211458	0.404784	0.22839
	0.0382209	0.104723	0.194445	0.497405	0.22838		0.0110433	0.172542	0.281415	0.404784	0.22839
	0.0872894	0.168272	0.211969	0.404528	0.22838		0.0526266	0.204473	0.145483	0.404784	0.22839
	-0.00175636	0.219044	0.211969	0.404528	0.22838		0.0608146	0.173355	0.30848	0.404784	0.244231
	-0.0944861	0.16223	0.25708	0.404528	0.22838		0.160116	0.265858	0.24158	0.398354	0.244231
	-0.0528297	0.343074	0.310184	0.363465	-0.0875958		-0.00919332	0.0976259	0.212098	0.404784	0.22839
	0.0723259	0.263686	0.308455	0.271669	0.244244		-0.0203224	0.219175	0.30848	0.404784	0.244231
	0.0966936	0.263686	0.308455	0.271669	0.244244		-0.00304613	0.0714351	0.211458	0.297987	0.225823
	0.017288	0.271996	0.308455	0.271669	0.244244		-0.0108133	0.191977	0.211458	0.38093	0.225823
	-0.0730999	0.18098	0.270398	0.271669	0.244244		-0.0234297	0.180392	0.211458	0.297987	0.225823
	0.00786556	0.263686	0.308455	0.271669	0.244244		0.0278875	0.128865	0.212098	0.404784	0.22839
	-0.0312682	0.271996	0.308455	0.271669	0.244244		-0.0105095	0.263706	0.30848	0.271537	0.244231
	0.0788078	0.263686	0.308455	0.271669	0.244244		0.042193	0.137883	0.212395	0.404784	0.22839
	0.00234272	0.104723	0.324032	0.271669	0.244244		-0.0361597	0.245641	0.359581	0.159136	0.329056
	0.00588405	0.104723	0.0941621	0.271669	0.244244		0.0186026	0.263706	0.30848	0.404784	0.244231
	0.18276	0.263686	0.308455	0.271669	0.244244		0.0646836	0.263706	0.30848	0.404784	0.244231
	-0.0235847	0.144406	0.324032	0.271669	0.244244		0.0626572	0.272095	0.240921	0.271537	0.225823
	0.00216361	0.263686	0.308455	0.271669	0.244244		0.127951	0.275812	0.240921	0.271537	0.225823
	0.099894	0.284424	0.306637	0.20831	0.317789		-0.0152433	0.104676	0.240921	0.271537	0.225823
	0.0198068	0.241814	0.308455	0.271669	0.244244		-0.0541318	0.247712	0.137248	0.255235	0.225823
	0.0216092	0.263686	0.308455	0.271669	0.244244		0.15513	0.203827	0.257083	0.271537	0.225823
	-0.0183045	0.229386	0.308455	0.271669	0.244244		0.0191312	0.279834	0.257083	0.404784	0.22839
	0.0324123	0.260254	0.324032	0.271669	0.244244		0.0529953	0.219175	0.212098	0.404784	0.22839
	-0.0445973	0.09764	0.211969	0.404528	0.22838		0.0529953	0.219175	0.212098	0.404784	0.22839
	-0.0813355	0.0881516	0.319245	0.264463	0.326945		0.10492	0.26853	0.170126	0.404784	0.22839
	0.0349367	0.152403	0.309379	0.264463	0.326945		-0.0229255	-2.08167e-17	0.077503	0.404784	0.22839
	0.0240597	0.165253	0.166835	0.264463	0.326945		-0.0452247	0.231087	0.212098	0.404784	0.22839
	-0.0161626	0.09764	0.122517	0.135295	0.394204		-0.0488642	-2.08167e-17	0.250362	0.404784	0.22839
	0.0104958	0.153177	0.18647	0.404528	0.22838		-0.0355771	0.219175	0.212098	0.404784	0.22839
	-0.0279287	0.219044	0.211969	0.404528	0.22838		0.100818	0.222897	0.257083	0.404784	0.22839
	0.0286232	0.219044	0.211969	0.404528	0.338246		-0.0638844	0.0639003	0.257083	0.404784	0.22839
	0.0657872	0.258927	0.25708	0.271669	0.225752		-0.0494996	0.279834	0.257083	0.404784	0.22839
	-0.0152408	0.216941	0.277329	0.264463	0.185654		-0.0125063	0.279834	0.257083	0.404784	0.327089
	-0.0191465	0.171274	0.247252	0.126856	0.244244		0.00561294	0.0921696	0.212098	0.404784	0.22839
	0.036053	0.219044	0.33798	0.404528	0.326945		0.0658671	0.279834	0.257083	0.404784	0.22839
	0.0274894	0.0675101	0.0870083	0.15913	0.146871		-0.0233298	0.168373	0.257083	0.404784	0.22839
	-0.040631	0.0393809	0.290142	0.15913	0.146871		-0.0130468	0.279834	0.257083	0.404784	0.22839
	0.0260062	0.257626	0.290142	0.15913	0.146871		-0.0124113	0.219175	0.257083	0.404784	0.22839
	-0.0290134	0.189244	0.211459	0.297989	0.225752		-0.00703869	0.320014	0.313404	0.220522	0.22839
	-0.0487558	0.104723	0.211459	0.297989	0.225752		0.0903037	0.279834	0.257083	0.404784	0.22839
	-0.0489106	0.21092	0.143607	0.297989	0.225752		0.0341514	0.279834	0.257083	0.404784	0.22839
	0.0800499	0.184358	0.211459	0.297989	0.225752		0.00561294	0.0921696	0.257083	0.404784	0.22839
	0.0256615	0.197126	0.232874	0.297989	0.225752		0.0191312	0.279834	0.257083	0.404784	0.22839
	0.0376243	0.189244	0.211459	0.297989	0.225752		-0.0128156	0.219175	0.257083	0.404784	0.22839
	0.00299378	0.189244	0.211459	0.297989	0.225752		-0.0638844	0.00422576	0.257083	0.404784	0.22839
	-0.0441712	0.128159	0.211459	0.297989	0.225752		0.0493448	0.279834	0.257083	0.404784	0.22839
	-0.036243	0.0474119	0.173329	0.297989	0.225752		-0.0194592	0.279834	0.257083	0.404784	0.22839
	-0.060759	0.104723	0.211459	0.297989	0.225752		0.0523488	0.279834	0.257083	0.404784	0.22839
	0.00681836	0.184358	0.211459	0.297989	0.225752		-0.0377146	0.279834	0.257083	0.404784	0.22839
	-0.0541073	0.122893	0.173329	0.297989	0.225752		0.0918058	0.279834	0.257083	0.404784	0.22839
	-0.0304105	0.206979	0.213562	0.271669	0.225752		-0.0169174	0.00870893	0.212098	0.404784	0.22839
	0.0395365	0.184358	0.211459	0.297989	0.225752		0.0778832	0.284912	0.257083	0.404784	0.22839
	0.0958372	0.184358	0.211459	0.297989	0.225752		0.026179	0.279834	0.257083	0.404784	0.22839
	0.044962	0.149834	0.211459	0.297989	0.225752		-0.0310711	-2.08167e-17	0.185512	0.404784	0.22839
	0.0590658	0.189244	0.211459	0.297989	0.225752		-0.0512328	-2.08167e-17	0.313404	0.220522	0.22839
	0.0167545	0.197126	0.232874	0.297989	0.225752		-0.0497308	-2.08167e-17	0.185512	0.404784	0.22839
	0.00513477	0.0682524	0.211459	0.297989	0.225752		-0.00940729	0.279834	0.257083	0.404784	0.22839
	0.00276509	0.0240333	0.143607	0.297989	0.225752		-0.0653865	-2.08167e-17	0.257083	0.404784	0.22839
	-0.00908333	0.184358	0.211459	0.297989	0.225752		-0.0229255	0.279834	0.257083	0.404784	0.22839
	0.0283742	0.0943029	0.211459	0.297989	0.225752		0.107924	0.208856	0.257083	0.404784	0.22839
	0.0934675	0.184358	0.211459	0.297989	0.326945		0.00584408	0.279834	0.257083	0.404784	0.22839
	-0.00151689	0.104723	0.211459	0.297989	0.225752		0.00561294	0.219175	0.257083	0.404784	0.22839
	0.0258902	0.184358	0.211459	0.297989	0.225752		0.150385	0.336395	0.304807	0.343981	-0.104775
	-0.0233014	0.149834	0.211459	0.297989	0.225752		-0.0413541	0.253319	0.257083	0.404784	0.22839
	0.0556169	0.234074	0.309379	0.264463	0.326945		-0.035346	0.219175	0.257083	0.404784	0.22839
	-0.0682849	0.234074	0.309379	0.271669	0.326945		-0.0214235	0.219175	0.212098	0.404784	0.22839
	-0.00287216	0.12325	0.309379	0.264463	0.326945		0.0827936	0.279834	0.257083	0.404784	0.22839
	0.0551805	0.0492627	0.0887734	0.264463	0.326945		0.0603195	0.279834	0.257083	0.404784	0.22839
	-0.0311349	0.234074	0.309379	0.264463	0.326945		-0.0229255	0.219175	0.257083	0.404784	0.22839
	0.0441597	0.234074	0.309379	0.264463	0.326945		-0.0224632	0.231087	0.212098	0.404784	0.22839
	0.0551805	0.0672595	0.309379	0.264463	0.326945		0.0903037	0.279834	0.257083	0.404784	0.22839
	0.174287	0.156604	0.309379	0.264463	0.326945		-0.0229255	0.152109	0.257083	0.404784	0.22839
	0.0351024	0.234074	0.309379	0.264463	0.326945		-0.0184194	0.320014	0.313404	0.220522	0.22839
	0.0884083	0.234074	0.309379	0.264463	0.326945		0.026179	0.279834	0.257083	0.404784	0.22839
	-0.0171126	0.181664	0.183049	0.264463	0.326945		-0.00854071	0.219175	0.212098	0.404784	0.22839
	-0.0460299	0.12325	0.309379	0.264463	0.326945		-0.0235609	0.059511	0.212098	0.404784	0.22839
	0.0504337	0.0788742	0.180962	0.181719	0.326945		-0.0226944	0.279834	0.257083	0.404784	0.22839
	-0.0507767	0.12325	0.309379	0.264463	0.326945		-0.0124113	0.295442	0.250362	0.404784	0.22839
	0.0840978	0.234074	0.309379	0.264463	0.326945		-0.0214235	0.279834	0.257083	0.404784	0.22839
	0.0493429	0.234074	0.309379	0.264463	0.326945		0.0948098	0.279834	0.257083	0.404784	0.22839
	0.107396	0.234074	0.309379	0.264463	0.326945		0.0472073	0.279834	0.257083	0.404784	0.22839
	0.150553	0.0672595	0.309379	0.264463	0.326945		-0.0347105	0.26853	0.170126	0.404784	0.22839
	0.0629288	0.234074	0.309379	0.264463	0.326945		-0.0229255	0.279834	0.257083	0.404784	0.22839
	-0.0745108	0.181664	0.183049	0.264463	0.326945		-0.0347105	0.26853	0.170126	0.404784	0.22839
	-0.0225139	0.234074	0.309379	0.264463	0.326945		-0.0169174	0.222897	0.257083	0.404784	0.22839
	-0.0415012	0.0540082	0.309379	0.264463	0.326945		0.100818	0.208856	0.257083	0.404784	0.22839
	0.0249543	0.234074	0.309379	0.264463	0.326945		0.00561294	0.279834	0.257083	0.404784	0.22839
	0.0168271	0.0263117	-7.63278e-17	0.264463	0.326945		-0.0512328	-2.08167e-17	0.313404	0.220522	0.22839
	-0.0272608	0.159115	0.180962	0.135295	0.394204		0.0963118	0.279834	0.257083	0.404784	0.22839
	-0.0171126	0.181664	0.183049	0.264463	0.326945		0.113641	0.219175	0.212098	0.404784	0.22839
	-0.0128021	0.122781	0.309379	0.264463	0.326945		-0.0638844	-2.08167e-17	0.185409	0.404784	0.22839
	0.14537	0.234074	0.309379	0.264463	0.326945		0.150385	0.336395	0.304807	0.343981	-0.104775
	0.0931551	0.104784	0.122517	0.135295	0.394204		0.0743399	0.18991	0.212395	0.404784	0.22839
	0.069421	0.156604	0.309379	0.264463	0.326945		0.0289064	0.219175	0.212098	0.404784	0.22839
	-0.0412831	0.145981	0.309379	0.264463	0.326945		-0.0258642	0.219175	0.212098	0.404784	0.22839
	0.0266996	0.238036	0.309379	0.264463	0.326945		-0.0381172	0.219175	0.212098	0.404784	0.22839
	-0.0460299	0.114017	0.180962	0.181719	0.326945		-0.0517614	0.168373	0.212098	0.404784	0.22839
	0.0348842	0.129844	0.0887734	0.264463	0.326945		0.0350294	0.219175	0.212098	0.404784	0.22839
	-0.0749471	0.114017	0.180962	0.181719	0.326945		0.0356371	0.168373	0.212098	0.404784	0.22839
	0.0402856	0.12325	0.166835	0.264463	0.326945		-0.0588165	0.219175	0.212098	0.404784	0.22839
	-0.00783715	0.234074	0.309379	0.264463	0.326945		0.0422262	0.219175	0.212098	0.404784	0.22839
	0.14537	0.234074	0.309379	0.264463	0.326945		0.00918041	0.219175	0.212098	0.404784	0.22839
	-0.0266063	0.234074	0.309379	0.264463	0.326945		0.0685413	0.219175	0.212098	0.404784	0.22839
	0.002311	0.234074	0.309379	0.264463	0.326945		-0.0305961	0.219175	0.212098	0.404784	0.22839
	-0.0557417	0.0956429	0.309379	0.264463	0.326945		-0.0434086	0.184358	0.212098	0.404784	0.22839
	0.0633652	0.102743	0.309379	0.264463	0.326945		-0.0411787	0.219175	0.270522	0.444863	0.22839
	0.0348842	0.234074	0.309379	0.264463	0.326945		0.116671	0.219175	0.281415	0.404784	0.22839
	0.002311	0.234074	0.309379	0.264463	0.326945		-0.00590313	0.199554	0.259077	0.444863	0.22839
	0.0314464	0.204213	0.309379	0.264463	0.326945		0.00720702	0.239177	0.278739	0.159136	0.146883
	0.0016565	0.234074	0.309379	0.264463	0.326945		-0.0284352	0.0647945	0.186497	0.271537	0.34023
	-0.0408467	0.234074	0.309379	0.264463	0.326945		0.0793935	0.217276	0.275764	0.339715	0.225823
	0.0113683	0.12325	0.166835	0.297989	0.326945		0.0285687	0.183985	0.202727	0.494429	0.22839
	0.0351024	0.159115	0.180962	0.135295	0.394204		0.0402349	0.226542	0.30848	0.404784	0.244231
	0.0884083	0.234074	0.309379	0.264463	0.326945		0.0843277	0.204504	0.30848	0.404784	0.244231
	0.106305	0.234074	0.309379	0.264463	0.326945		0.0220675	0.0921696	0.212098	0.404784	0.244231
	0.0355387	0.234074	0.309379	0.264463	0.326945		-0.038407	0.219175	0.212098	0.404784	0.244231
	0.00640332	0.0540082	0.166835	0.264463	0.326945		0.0106199	0.219175	0.212098	0.404784	0.244231
	0.136313	0.122781	0.309379	0.264463	0.326945		-0.0157959	0.263706	0.30848	0.404784	0.244231
	0.0972474	0.234074	0.309379	0.264463	0.326945		-0.0371531	0.219175	0.212098	0.404784	0.244231
	0.0556169	0.234074	0.309379	0.264463	0.326945		-0.0298035	0.310286	0.291175	0.404784	0.244231
	0.106305	0.234074	0.309379	0.264463	0.326945		-0.0328514	0.219175	0.30848	0.404784	0.244231
	-0.0555235	0.159115	0.180962	0.135295	0.394204		0.140385	0.279433	0.30848	0.404784	0.244231
	0.0118046	0.234074	0.309379	0.264463	0.326945		0.0158728	0.219175	0.30848	0.404784	0.244231
	0.169541	0.114017	0.319245	0.264463	0.326945		-0.0416062	0.330855	0.370382	0.404784	0.244231
	-0.0128021	0.122781	0.309379	0.264463	0.326945		0.124627	0.263706	0.30848	0.404784	0.244231
	0.0248697	0.0640935	0.211969	0.404528	0.22838		-0.0354022	0.219175	0.212098	0.404784	0.244231
	0.0475513	0.0682524	0.211969	0.404528	0.22838		0.00806914	0.168373	0.30848	0.404784	0.244231
	-0.014544	0.219044	0.211969	0.404528	0.22838		-0.0468591	0.330855	0.370382	0.404784	0.244231
	0.0712729	0.0888461	0.185399	0.404528	0.22838		-0.0444597	0.263706	0.30848	0.404784	0.244231
	0.0665347	0.0914172	0.185399	0.404528	0.22838		0.0585708	0.219175	0.212098	0.404784	0.244231
	0.0232903	0.185379	0.226487	0.404528	0.22838		0.00171374	0.263706	0.30848	0.404784	0.244231
	0.00059721	0.260393	0.25708	0.220519	0.225752		0.00601547	0.330855	0.370382	0.404784	0.244231
	-0.0136404	0.296092	0.275127	0.271669	0.225752		0.0583664	0.116652	0.186497	0.271537	0.322682
	-0.0573858	0.299337	0.275127	0.298213	0.225752		0.0452099	0.117232	0.212098	0.494429	0.22839
	0.142642	0.27983	0.25708	0.271669	0.225752		0.0110952	0.184358	0.211458	0.297987	0.225823
	0.0863976	0.260393	0.25708	0.271669	0.225752		-0.0140246	0.108939	0.211458	0.297987	0.225823
	0.000192722	0.27983	0.25708	0.271669	0.225752		0.0652538	0.104676	0.211458	0.297987	0.225823
	0.0420664	0.27983	0.25708	0.271669	0.225752		-0.00513444	0.0675126	0.211458	0.297987	0.225823
	0.0649807	0.231184	0.193004	0.271669	0.225752		-0.0755687	0.184358	0.211458	0.297987	0.225823
	0.121811	0.27983	0.25708	0.271669	0.225752		-0.029995	0.152389	0.174013	0.297987	0.225823
	0.123894	0.299337	0.275127	0.298213	0.225752		0.115509	0.184358	0.211458	0.297987	0.225823
	0.12806	0.27983	0.25708	0.271669	0.225752		0.0645038	0.18294	0.133405	0.119969	0.244231
	0.028982	0.27983	0.25708	0.271669	0.225752		-0.0392873	0.115262	0.30848	0.271537	0.244231
	0.00190149	0.104723	0.0941621	0.271669	0.225752		-0.0277667	0.123233	0.166811	0.264411	0.327089
	-0.029931	0.27983	0.25708	0.271669	0.225752		-0.0317006	0.176697	0.135411	0.264411	0.327089
	-0.0292011	0.104723	0.0941621	0.271669	0.225752		-0.0295328	0.153668	0.173068	0.12795	0.394915
	0.142642	0.287978	0.25708	0.271669	0.225752		0.0251361	0.140336	0.309321	0.264411	0.185763
	0.0913538	0.104723	0.0941621	0.271669	0.225752		-0.0239614	0.0573217	0.211458	0.404784	0.22839
	0.0988962	0.27983	0.25708	0.271669	0.225752		0.102269	0.184358	0.211458	0.404784	0.22839
	0.000192722	0.0943029	0.0941621	0.271669	0.225752		0.126989	0.184358	0.211458	0.297987	-0.250854
	-0.00851408	0.296092	0.275127	0.271669	0.225752		0.0332714	0.263706	0.30848	0.404784	0.244231
	-0.0431783	0.27983	0.25708	0.271669	0.225752		-0.0153779	0.170713	0.212098	0.404784	0.244231
	-0.0157235	-4.16334e-17	0.25708	0.271669	0.225752		-0.0160144	0.263706	0.30848	0.404784	0.244231
	-0.0223472	0.231184	0.193004	0.271669	0.225752		0.0175482	0.219175	0.30848	0.404784	0.244231
	-0.0236816	0.260393	0.25708	0.271669	0.225752		0.107036	0.263706	0.359581	0.119969	0.329056
	0.0837287	0.27983	0.25708	0.271669	0.225752		0.108324	0.279834	0.257083	0.271537	0.225823
	-0.0136404	0.27983	0.25708	0.271669	0.225752		-0.0292875	0.279834	0.257083	0.271537	0.225823
	0.115561	0.27983	0.25708	0.271669	0.225752		0.0844844	0.274554	0.257083	0.271537	0.225823
	-0.0390121	0.104723	0.0941621	0.271669	0.225752		0.00574769	0.152109	0.257083	0.271537	0.225823
	-0.0202641	0.104723	0.309082	0.271669	0.326945		-0.0567359	0.104676	0.257083	0.271537	0.225823
	-0.0168465	-4.16334e-17	0.193004	0.271669	0.225752		0.12793	0.279834	0.257083	0.271537	0.225823
	0.0503989	0.27983	0.25708	0.271669	0.225752		0.000597223	0.279834	0.257083	0.220522	0.225823
	-0.0431783	0.27983	0.25708	0.271669	0.225752		0.0556437	0.279834	0.257083	0.220522	0.225823
	-0.0511365	0.104723	0.25708	0.271669	0.225752		-0.000134115	0.274554	0.257083	0.271537	0.225823
	-0.0653439	0.287978	0.25708	0.271669	0.225752		-0.0514224	0.298988	0.274802	0.29424	0.225823
	0.0968131	0.27983	0.25708	0.271669	0.225752		-0.00797652	0.104676	0.0941185	0.271537	0.225823
	0.0144002	0.104723	0.0941621	0.271669	0.225752		0.0884056	0.298988	0.274802	0.29424	0.225823
	0.0331482	0.27983	0.25708	0.271669	0.225752		-0.0567359	0.104676	0.257083	0.271537	0.225823
	0.028982	0.152107	0.25708	0.271669	0.225752		0.00574769	0.279834	0.257083	0.271537	0.225823
	-0.0210128	0.273374	0.25708	0.271669	0.225752		-0.0332087	0.104676	0.257083	0.271537	0.225823
	-0.0164722	0.27983	0.25708	0.271669	0.225752		0.0850528	0.279834	0.257083	0.271537	0.225823
	0.00606772	0.0682524	0.0941621	0.271669	0.225752		-0.00658424	0.274554	0.257083	0.271537	0.225823
	0.105146	0.249034	0.25708	0.271669	0.225752		-0.0175239	0.0359953	0.257083	0.271537	0.225823
	0.103062	0.237675	0.226119	0.271669	0.225752		0.0844844	0.274554	0.257083	0.271537	0.225823
	0.142642	0.27983	0.25708	0.271669	0.225752		0.0615255	0.234849	0.197528	0.271537	0.225823
	-0.00151605	-4.16334e-17	0.25708	0.271669	0.225752		0.00574769	0.0682218	0.0941185	0.271537	0.225823
	-0.0136404	0.0636793	0.275127	0.298213	0.225752		0.00691661	0.0682218	0.0941185	0.271537	0.22839
	0.077105	0.27983	0.25708	0.271669	0.225752		-0.0441945	-2.08167e-17	0.257083	0.220522	0.225823
	0.100019	0.27983	0.25708	0.271669	0.225752		-0.0475012	0.279834	0.257083	0.271537	0.225823
	0.000567067	0.104723	0.0941621	0.271669	0.225752		-0.0399145	0.295934	0.274802	0.271537	0.225823
	0.103062	0.27983	0.25708	0.271669	0.225752		-0.0508541	0.104676	0.257083	0.271537	0.225823
	0.077105	0.27983	0.25708	0.271669	0.225752		0.100482	0.279834	0.257083	0.271537	0.225823
	0.028982	0.104723	0.25708	0.271669	0.225752		0.0312355	0.104676	0.257083	0.271537	0.225823
	-0.00151605	0.27983	0.25708	0.271669	0.225752		-0.0567359	0.104676	0.257083	0.271537	0.225823
	-0.00947416	0.27983	0.25708	0.271669	0.225752		0.106364	0.240958	0.228687	0.271537	0.225823
	-0.0511365	0.27983	0.25708	0.271669	0.225752		0.0253537	0.279834	0.257083	0.271537	0.225823
	0.0812712	0.273374	0.25708	0.271669	0.22838		0.00265044	0.104676	0.0941185	0.271537	0.225823
	-0.0147634	-4.16334e-17	0.0941621	0.271669	0.225752		0.141655	0.28219	0.257083	0.271537	0.225823
	0.0649807	0.287978	0.25708	0.271669	0.225752		-0.0508541	0.104676	0.257083	0.271537	0.225823
	-0.0168465	0.249034	0.25708	0.271669	0.225752		-0.0138583	0.279834	0.257083	0.271537	0.225823
	-0.055677	0.27983	0.25708	0.271669	0.225752		-0.00993712	0.104676	0.257083	0.271537	0.225823
	0.0646063	0.27983	0.25708	0.271669	0.225752		0.0312355	0.240958	0.228687	0.271537	0.225823
	-0.0452615	0.27983	0.25708	0.271669	0.225752		-0.0144266	0.28219	0.257083	0.271537	0.225823
	-0.0414696	0.27983	0.25708	0.271669	0.225752		-0.0189162	0.279834	0.257083	0.271537	0.225823
	-0.0282222	0.0474119	0.193004	0.271669	0.225752		0.104403	0.262337	0.257083	0.271537	0.225823
	-0.0352202	0.260393	0.25708	0.271669	0.225752		0.106364	0.234849	0.197528	0.271537	0.225823
	0.119727	0.27983	0.25708	0.271669	0.225752		-0.00854485	0.288298	0.257083	0.271537	0.225823
	-0.0206384	0.231184	0.193004	0.271669	0.225752		0.104403	0.262337	0.257083	0.271537	0.225823
	0.105146	0.231184	0.193004	0.271669	0.225752		0.139694	0.279834	0.257083	0.271537	0.225823
	-0.0507621	0.27983	0.25708	0.271669	0.225752		0.0965607	0.279834	0.257083	0.271537	0.22839
	0.0295677	0.27983	0.25708	0.271669	0.225752		-0.0144266	0.28219	0.257083	0.271537	0.225823
	0.0562739	0.249034	0.25708	0.271669	0.225752		-0.0586965	0.253174	0.259845	0.133277	-0.113896
	-0.00643097	-4.16334e-17	0.259233	0.127068	-0.108804		-0.0197401	0.279834	0.257083	0.271537	0.225823
	0.0179289	0.148474	0.18647	0.298213	0.225752		0.00574769	0.279834	0.257083	0.271537	0.225823
	-0.02561	0.184427	0.193258	0.249379	0.225752		0.0312355	0.240958	0.228687	0.271537	0.225823
	-0.0475745	0.231161	0.234158	0.271669	0.244244		-0.00462364	0.104676	0.0941185	0.271537	0.225823
	0.0350614	0.284424	0.308455	0.20831	0.317789		-0.0158189	0.298988	0.274802	0.29424	0.225823
	0.0338465	0.104601	0.309379	0.264463	0.185654		0.00574769	0.104676	0.0941185	0.271537	0.225823
	0.0460507	0.140362	0.309379	0.264463	0.185654		-0.0175239	0.279834	0.257083	0.271537	0.225823
	0.058255	0.234074	0.309379	0.264463	0.185654		-0.0228374	0.262337	0.257083	0.271537	0.225823
	-0.0149706	0.140362	0.309379	0.264463	0.185654		0.12793	0.279834	0.257083	0.271537	0.225823
	-0.0159189	0.104723	0.211969	0.404528	0.22838		0.100482	0.279834	0.257083	0.271537	0.225823
	-0.0263307	0.148474	0.211969	0.404528	0.22838		-0.0138583	0.279834	0.257083	0.271537	0.225823
	-0.00263138	0.136405	0.211969	0.404528	0.326945		0.124009	0.253174	0.259845	0.133277	-0.113896
	0.0267347	0.201704	0.211969	0.404528	0.22838		-0.0385222	0.104676	0.0941185	0.271537	0.225823
	0.0348605	0.219044	0.211969	0.404528	0.22838		-0.0332087	0.104676	0.257083	0.271537	0.225823
	0.0064058	0.148474	0.18647	0.404528	0.22838		0.139694	0.279834	0.257083	0.271537	0.225823
	0.0328414	-4.16334e-17	0.119592	0.212659	0.0449519		-0.0424434	0.279834	0.257083	0.271537	0.225823
	0.092927	0.221056	0.252416	0.404528	0.326945		0.00574769	0.295934	0.274802	0.271537	0.225823
	-0.0139081	-4.16334e-17	0.211459	0.297989	0.244244		-0.00601592	0.12919	0.228687	0.271537	0.225823
	0.0998121	0.237235	0.308455	0.297989	0.244244		-0.0340327	0.288298	0.257083	0.271537	0.225823
	0.110405	0.263686	0.308455	0.297989	0.244244		-0.0301115	0.279834	0.257083	0.271537	0.225823
	-0.0173351	0.263686	0.308455	0.297989	0.244244		0.108324	0.279834	0.257083	0.271537	0.225823
	-0.0462554	0.263686	0.308455	0.119959	0.244244		0.00182649	0.0942607	0.257083	0.271537	0.225823
	0.0515196	0.263686	0.308455	0.297989	0.244244		-0.044404	-2.08167e-17	0.0941185	0.271537	0.225823
	0.03158	0.263686	0.308455	0.297989	0.244244		-0.0158189	0.279834	0.257083	0.271537	0.225823
	-0.0129737	0.263686	0.308455	0.297989	0.244244		0.00966889	0.104676	0.257083	0.271537	0.225823
	0.0854803	0.263686	0.308455	0.297989	0.244244		0.100482	0.279834	0.257083	0.271537	0.225823
	0.04747	0.184358	0.308455	0.297989	0.244244		-0.0326854	0.104676	0.211458	0.297987	0.225823
	-0.0139081	0.111133	0.211459	0.297989	0.244244		0.0848639	0.184358	0.211458	0.297987	0.225823
	0.00634333	0.263686	0.308455	0.297989	0.244244		0.19265	0.136825	0.211458	0.297987	0.225823
	0.0346951	0.184358	0.308455	0.297989	0.244244		-0.00888341	0.210755	0.143643	0.297987	0.225823
	0.028153	0.263686	0.308455	0.297989	0.244244		0.0487508	0.164063	0.211458	0.297987	0.225823
	0.03158	0.263686	0.308455	0.297989	0.244244		0.00958944	0.104676	0.0941185	0.297987	0.225823
	0.0147555	0.184358	0.211459	0.297989	0.244244		0.0400752	0.184358	0.211458	0.297987	0.225823
	-0.0652438	0.215866	0.366024	0.404528	0.22838		-0.0256314	0.206864	0.213734	0.271537	0.225823
	0.0121523	0.231706	0.309379	0.404528	0.22838		0.103439	0.122837	0.211458	0.297987	0.225823
	-0.0279819	0.125922	0.166835	0.271669	0.326945		0.00019233	0.184358	0.211458	0.297987	0.225823
	-0.0560015	0.119543	0.309379	0.264463	0.185654		-0.00698349	0.184358	0.211458	0.297987	0.225823
	0.0260398	0.140362	0.309379	0.264463	0.185654		-0.0537497	0.184358	0.211458	0.297987	0.225823
	0.0620411	0.165253	0.309379	0.264463	0.185654		-0.0490633	-2.08167e-17	0.211458	0.297987	0.225823
	0.07733	0.234074	0.309379	0.264463	0.185654		-0.0562391	0.136825	0.211458	0.297987	0.225823
	-0.00932682	0.171653	0.309379	0.264463	0.185654		0.073026	0.184358	0.211458	0.297987	0.225823
	0.00335154	0.321177	0.275127	0.271669	0.412223		0.0682665	0.161013	0.211458	0.297987	0.225823
	0.145976	0.239598	0.275127	0.298213	0.326945		0.0236242	0.184358	0.211458	0.297987	0.225823
	-0.0401208	0.101544	0.211969	0.404528	0.22838		-0.0607792	0.152389	0.174013	0.297987	0.225823
	0.0773233	0.219044	0.211969	0.404528	0.22838		-0.02239	0.104676	0.0941185	0.271537	0.225823
	-0.0111556	0.13967	0.211969	0.404528	0.338246		0.0516936	0.104676	0.211458	0.297987	0.225823
	-0.134424	0.0682524	0.211969	0.404528	0.22838		0.087012	0.108939	0.211458	0.297987	0.225823
	-0.0363899	0.219044	0.211969	0.404528	0.22838		0.000143575	0.210755	0.143643	0.297987	0.225823
	-0.00196233	0.10595	0.0954852	0.404528	0.22838		-0.0303178	0.104676	0.211458	0.297987	0.225823
	-0.00108969	0.0833412	0.211459	0.297989	0.225752		-0.0208719	0.0460716	0.0941185	0.297987	0.225823
	-0.0106519	0.184358	0.211459	0.297989	0.225752		-0.0585823	0.150444	0.211458	0.297987	0.225823
	0.0482863	0.149834	0.211459	0.297989	0.225752		-0.0116699	0.184358	0.211458	0.297987	0.225823
	0.110762	0.184358	0.211459	0.297989	0.225752		0.0352913	0.184358	0.211458	0.297987	0.225823
	0.132528	0.172635	0.211459	0.297989	0.225752		0.0589669	0.184358	0.211458	0.297987	0.225823
	-0.0702074	0.295132	0.401287	0.264463	0.185654		0.0917715	0.184358	0.211458	0.297987	0.225823
	0.00910375	0.184358	0.211459	0.297989	0.225752		0.0706097	0.108939	0.211458	0.297987	0.225823
	0.0351024	0.159115	0.180962	0.135295	0.394204		0.0377564	0.164063	0.211458	0.297987	0.225823
	-0.0390387	0.331702	0.371013	0.281162	0.244244		-0.0374449	0.184358	0.211458	0.297987	0.225823
	0.0752695	0.219044	0.211969	0.404528	0.244244		0.0683397	0.150444	0.211458	0.297987	0.225823
	0.066494	0.263686	0.308455	0.404528	0.244244		0.0355351	0.184358	0.211458	0.297987	0.225823
	0.119519	0.209856	0.270398	0.271669	0.244244		0.0258942	0.104676	0.211458	0.297987	0.225823
	-0.00128356	0.239011	0.205528	0.497405	0.22838		0.0422965	0.115437	0.211458	0.297987	0.225823
	0.110533	0.219044	0.211969	0.404528	0.22838		0.00717313	0.184358	0.211458	0.297987	0.225823
	0.0979564	0.237618	0.205528	0.497405	0.22838		-0.0103407	0.112039	0.212098	0.404784	0.22839
	0.0292185	0.219044	0.211969	0.404528	0.22838		-0.00713355	0.141336	0.185512	0.404784	0.22839
	-0.030208	0.231088	0.226487	0.404528	0.22838		0.00169995	0.168373	0.212098	0.404784	0.22839
	-0.00802669	0.108205	0.173486	0.271669	0.338246		0.0727229	0.125453	0.212098	0.404784	0.22839
	-0.012121	0.105795	0.211969	0.404528	0.22838		0.0179431	0.0909184	0.116698	0.404784	0.22839
	0.00021344	0.201704	0.211969	0.404528	0.22838		-0.0569715	0.219175	0.212098	0.404784	0.22839
	0.0895549	0.110988	0.127691	0.404528	0.22838		0.076982	0.104676	0.212098	0.404784	0.22839
	0.0129512	0.104723	0.185399	0.404528	0.22838		0.025907	0.104676	0.212098	0.404784	0.22839
	-0.0938095	0.219044	0.211969	0.404528	0.22838		0.0377044	0.234004	0.202727	0.494429	0.22839
	0.0255792	0.219044	0.211969	0.404528	0.22838		0.0442507	0.183985	0.202727	0.494429	0.22839
	0.0554941	0.0682524	0.0941621	0.404528	0.22838		0.0966208	0.104676	0.212098	0.404784	0.22839
	0.0303413	0.168272	0.211969	0.404528	0.22838		0.0265255	0.104676	0.168358	0.271537	0.34023
	0.0820633	0.104723	0.211969	0.404528	0.22838		0.00328731	0.196079	0.222668	0.404784	0.22839
	0.0322416	0.214763	0.211969	0.404528	0.22838		-0.0251036	0.149964	0.212098	0.404784	0.22839
	0.034142	0.122893	0.211969	0.404528	0.22838		0.00179836	0.104676	0.0941185	0.271537	0.244231
	0.0552521	0.168272	0.211969	0.404528	0.22838		0.00644876	0.104676	0.30848	0.271537	0.244231
	0.100312	0.219044	0.211969	0.404528	0.22838		-0.0227489	0.260888	0.30461	0.271537	0.322682
	-0.0137793	0.104723	0.211969	0.404528	0.22838		-0.00310172	0.263706	0.30848	0.271537	0.244231
	-0.00326458	0.237618	0.205528	0.497405	0.22838		0.00438885	0.263706	0.30848	0.271537	0.244231
	-0.06534	0.104723	0.127691	0.404528	0.22838		0.177967	0.271129	0.30848	0.271537	0.244231
	0.0843201	0.219044	0.211969	0.404528	0.22838		-0.0563316	0.115437	0.30848	0.271537	0.244231
	-0.00885586	0.0887228	0.173486	0.271669	0.338246		-0.00130711	0.263706	0.30848	0.271537	0.244231
	0.0790402	0.141602	0.132705	0.497405	0.22838		-0.0214536	0.104676	0.30848	0.271537	0.244231
	0.0775141	0.13967	0.173486	0.271669	0.338246		0.0428717	0.226773	0.225864	0.271537	0.244231
	0.129985	0.219044	0.211969	0.404528	0.22838		0.0795599	0.263706	0.30848	0.271537	0.244231
	0.0682028	0.136405	0.211969	0.404528	0.22838		0.031511	0.253772	0.323509	0.271537	0.244231
	-0.0408841	0.214763	0.211969	0.404528	0.22838		-0.00433747	0.263706	0.30848	0.271537	0.244231
	0.0196652	0.219044	0.211969	0.404528	0.22838		0.138439	0.284629	0.30461	0.271537	0.322682
	-0.0347572	0.185379	0.226487	0.404528	0.22838		-0.0188631	0.263706	0.30848	0.271537	0.244231
	0.0466377	0.104723	0.211969	0.404528	0.22838		-0.0242938	0.146228	0.323509	0.271537	0.244231
	-0.00280966	0.214763	0.211969	0.404528	0.22838		-0.0330796	-2.08167e-17	0.323509	0.271537	0.244231
	0.0979564	0.219044	0.211969	0.404528	0.22838		0.165432	0.271129	0.30848	0.271537	0.244231
	0.0929007	0.11549	0.211969	0.404528	0.22838		-0.0356545	0.226773	0.225864	0.271537	0.244231
	0.0312511	0.104723	0.127691	0.404528	0.22838		-0.0426301	0.263706	0.30848	0.271537	0.244231
	0.019533	0.104723	0.211969	0.404528	0.22838		-0.0191284	0.104676	0.0941185	0.271537	0.244231
	0.130894	0.201704	0.211969	0.404528	0.22838		0.0152346	0.226773	0.225864	0.271537	0.244231
	0.101515	0.214763	0.211969	0.404528	0.22838		-0.0121528	0.104676	0.30848	0.271537	0.244231
	0.0999952	0.201704	0.211969	0.404528	0.22838		-0.00516802	0.104676	0.30848	0.271537	0.244231
	0.0683641	0.113551	0.211969	0.404528	0.22838		0.126048	0.284629	0.30461	0.271537	0.322682
	0.0648054	0.237618	0.205528	0.497405	0.22838		-0.0312694	0.263706	0.30848	0.271537	0.244231
	-0.0460571	0.191222	0.226487	0.404528	0.22838		-0.0105867	0.223772	0.251484	0.271537	0.225823
	-0.0453526	0.201704	0.211969	0.404528	0.22838		-0.0608804	0.219175	0.257083	0.404784	0.22839
	0.137102	0.219044	0.211969	0.404528	0.22838		0.0898326	0.231087	0.212098	0.404784	0.22839
	0.0777427	0.237618	0.205528	0.497405	0.22838		0.113125	0.24549	0.257083	0.404784	0.22839
	0.0775141	0.191222	0.226487	0.404528	0.22838		-0.0578721	0.0976259	0.185409	0.404784	0.22839
	0.0114251	0.11549	0.211969	0.404528	0.22838		0.0876967	0.234031	0.309321	0.264411	0.327089
	-0.0436136	0.219044	0.211969	0.404528	0.22838		0.00477015	0.234031	0.309321	0.264411	0.327089
	-0.0348379	0.174898	0.211969	0.404528	0.22838		-0.0580453	0.234031	0.309321	0.264411	0.327089
	-0.0907057	0.0340548	0.0941621	0.404528	0.22838		-0.0383934	0.234031	0.309321	0.264411	0.327089
	0.101515	0.136405	0.211969	0.404528	0.22838		0.020674	0.123233	0.166811	0.264411	0.327089
	0.034142	0.104723	0.211969	0.404528	0.22838		-0.0826957	0.234031	0.309321	0.264411	0.327089
	0.109542	0.231088	0.226487	0.404528	0.22838		-0.0679282	0.127098	0.0789268	0.264411	0.327089
	0.0661702	0.104723	0.0941621	0.404528	0.22838		0.0706542	0.234031	0.309321	0.264411	0.327089
	0.0149031	0.237618	0.205528	0.497405	0.22838		0.0115867	0.0540008	0.0788665	0.264411	0.327089
	0.028925	0.104723	0.211969	0.404528	0.22838		0.0581619	0.0686436	0.309321	0.264411	0.327089
	0.0109702	0.113551	0.211969	0.404528	0.22838		0.137677	0.121785	0.309321	0.264411	0.327089
	-0.0813944	0.104723	0.211969	0.404528	0.22838		0.0479359	0.234031	0.309321	0.264411	0.327089
	-0.0155183	-4.16334e-17	-7.63278e-17	0.404528	0.22838		0.108142	0.234031	0.309321	0.264411	0.327089
	-0.0657949	0.104723	0.0941621	0.404528	0.22838		-0.0236282	0.123233	0.166811	0.264411	0.327089
	0.0251243	0.13967	0.173486	0.271669	0.338246		0.00477235	0.234031	0.309321	0.264411	0.327089
	0.0276924	0.197752	0.226487	0.404528	0.22838		0.104733	0.107611	0.173068	0.17534	0.327089
	-0.00992704	0.219044	0.211969	0.404528	0.22838		0.0899674	0.234031	0.309321	0.264411	0.327089
	0.0846315	0.191222	0.226487	0.404528	0.22838		-0.0247625	0.107611	0.314279	0.264411	0.327089
	-0.0311985	0.136405	0.211969	0.404528	0.22838		0.0115845	0.0686436	0.309321	0.264411	0.327089
	0.0292185	0.191222	0.226487	0.404528	0.22838		-0.0349862	0.0540008	0.309321	0.264411	0.327089
	0.0305833	0.104723	0.211969	0.404528	0.22838		-0.0542973	0.234031	0.309321	0.264411	0.327089
	0.0253663	0.104723	0.205528	0.497405	0.22838		0.0945111	0.10673	0.126004	0.12795	0.394915
	0.080563	0.252196	0.275127	0.298213	0.225752		0.110415	0.127098	0.0789268	0.264411	0.327089
	0.00075345	0.213275	0.226119	0.271669	0.225752		-0.0156752	0.121785	0.309321	0.264411	0.327089
	-0.0663003	0.245252	0.269754	0.298213	0.225752		0.0362498	0.107611	0.173068	0.17534	0.327089
	-0.0390121	0.27983	0.25708	0.271669	0.225752		-0.0826957	0.153668	0.173068	0.12795	0.394915
	0.0510566	0.263686	0.308455	0.297989	0.244244		-0.0134044	0.199726	0.309321	0.264411	0.327089
	-8.00189e-05	0.263686	0.308455	0.176395	0.244244		0.00704088	0.127098	0.0789268	0.264411	0.327089
	0.0399198	0.148474	0.308455	0.271669	0.244244		-0.0383956	0.234031	0.309321	0.264411	0.327089
	-0.0502242	0.231088	0.226487	0.404528	0.22838		-0.00204423	0.123233	0.309321	0.264411	0.327089
	0.0128368	0.219044	0.226487	0.404528	0.22838		0.0490724	0.234031	0.309321	0.264411	0.327089
	0.0493856	0.168272	0.211969	0.404528	0.22838		0.0161304	0.234031	0.309321	0.264411	0.327089
	-0.023787	0.197868	0.211969	0.404528	0.22838		0.0138596	0.234031	0.309321	0.264411	0.327089
	-0.0897301	0.219044	0.211969	0.404528	0.22838		0.117227	0.234031	0.309321	0.264411	0.327089
	-0.0249045	0.219044	0.211969	0.404528	0.22838		-0.00772434	0.234031	0.309321	0.264411	0.327089
	-0.0271665	0.145513	0.211969	0.404528	0.22838		0.0627055	0.0580119	0.183935	0.264411	0.327089
	-0.0687847	0.112325	0.211969	0.404528	0.22838		0.0308956	0.0540008	0.309321	0.264411	0.327089
	-0.0719395	0.221056	0.211969	0.404528	0.22838		0.0558868	0.107611	0.314279	0.264411	0.327089
	0.00876214	0.219044	0.211969	0.404528	0.22838		-0.0156752	0.234031	0.309321	0.264411	0.327089
	-0.0077611	0.219044	0.211969	0.404528	0.22838		0.0922403	0.145955	0.309321	0.264411	0.327089
	0.0356218	0.168272	0.211969	0.404528	0.22838		-0.0383956	0.234031	0.309321	0.264411	0.327089
	-0.0509941	0.0875023	0.211969	0.404528	0.22838		0.0581575	0.176697	0.183935	0.264411	0.327089
	0.0193712	0.237618	0.211969	0.497405	0.22838		-0.0156752	0.234031	0.309321	0.264411	0.327089
	0.0107245	0.100491	0.127691	0.404528	0.22838		0.0456652	0.107611	0.314279	0.264411	0.327089
	-3.42886e-05	0.100491	0.211969	0.404528	0.22838		-0.0690647	0.234031	0.309321	0.264411	0.327089
	0.0816598	0.219044	0.211969	0.404528	0.22838		0.00590661	0.234269	0.309321	0.264411	0.327089
	-0.0240596	0.0682524	0.211969	0.404528	0.22838		0.0320342	0.123233	0.309321	0.264411	0.327089
	-0.0104935	0.15903	0.226487	0.404528	0.22838		-0.0202188	0.0263081	0.309321	0.264411	0.327089
	-0.0632929	0.168272	0.211969	0.404528	0.22838		0.020674	0.156328	0.309321	0.264411	0.327089
	0.0194461	0.219044	0.211969	0.404528	0.22838		0.149035	0.234031	0.309321	0.264411	0.327089
	0.0354124	0.219044	0.211969	0.404528	0.22838		0.0763365	0.0500453	0.183935	0.264411	0.327089
	0.0759726	0.219044	0.211969	0.404528	0.22838		0.0138596	0.234031	0.309321	0.264411	0.327089
	0.0470757	0.231088	0.226487	0.404528	0.22838		-0.031579	0.145955	0.309321	0.264411	0.327089
	0.0465034	0.144941	0.211969	0.404528	0.338246		0.0774707	0.234031	0.309321	0.264411	0.327089
	0.000388156	0.219044	0.211969	0.404528	0.22838		0.0763365	0.123233	0.166811	0.264411	0.327089
	0.0528401	0.219044	0.211969	0.404528	0.22838		-0.0247625	0.234031	0.309321	0.264411	0.327089
	-0.0766613	0.104723	0.211969	0.404528	0.22838		0.0627055	0.0580119	0.183935	0.264411	0.327089
	0.00733082	0.0866658	0.173486	0.404528	0.338246		0.0899674	0.234031	0.309321	0.264411	0.327089
	-0.0421977	0.100491	0.127691	0.497405	0.22838		0.0545859	0.195486	0.212098	0.404784	0.22839
	0.0112219	0.219044	0.211969	0.404528	0.22838		0.00839415	0.197989	0.212098	0.404784	0.22839
	0.0243656	0.219044	0.211969	0.404528	0.22838		0.0660772	0.219175	0.222668	0.404784	0.22839
	0.103725	0.221056	0.211969	0.404528	0.22838		-0.0425494	0.149964	0.212098	0.404784	0.22839
	0.0112219	0.219044	0.211969	0.404528	0.22838		-0.0363231	0.180454	0.218308	0.297987	0.244231
	-0.00361156	0.104723	0.211969	0.404528	0.22838		0.117657	0.227001	0.222668	0.404784	0.22839
	0.0267504	0.113551	0.211969	0.404528	0.22838		0.0887773	0.189075	0.222668	0.404784	0.22839
	0.113441	0.219044	0.211969	0.404528	0.22838		-0.00595035	0.0675126	0.0870116	0.159136	0.146883
	-0.0375029	0.219044	0.226487	0.404528	0.22838		-0.0244386	0.221315	0.240418	0.159136	0.146883
	-0.0337758	0.100491	0.127691	0.404528	0.22838		-0.00855095	0.258463	0.290148	0.159136	0.146883
	0.0644438	0.219044	0.211969	0.404528	0.338246		0.110465	0.267339	0.290148	0.159136	0.146883
	0.0243656	0.219044	0.211969	0.404528	0.22838		0.0258251	0.0675126	0.230301	0.159136	0.146883
	0.0152216	0.219044	0.211969	0.404528	0.22838		0.16593	0.233698	0.280886	0.120029	0.146883
	-0.0180975	0.168272	0.211969	0.404528	0.22838		0.0609123	0.136825	0.211458	0.297987	0.225823
	-0.0786237	0.219044	0.211969	0.404528	0.22838		0.0133577	0.210755	0.143643	0.297987	0.225823
	0.0561808	0.168272	0.211969	0.404528	0.22838		0.000428571	0.0892939	0.211458	0.297987	0.225823
	0.00364834	0.201704	0.211969	0.404528	0.22838		-0.0474115	0.0633512	0.211458	0.297987	0.225823
	0.0327396	0.0943029	0.211969	0.404528	0.22838		0.136482	0.150986	0.211458	0.297987	0.225823
	-0.0600632	0.0604538	0.205528	0.497405	0.22838		0.0887179	0.184358	0.211458	0.297987	0.225823
	0.0739353	0.219044	0.211969	0.404528	0.22838		-0.00507163	0.104676	0.211458	0.297987	0.225823
	0.0275064	0.219044	0.211969	0.404528	0.22838		0.0114862	0.184358	0.211458	0.297987	0.22839
	0.0808172	0.231088	0.226487	0.404528	0.22838		0.0702313	0.184358	0.211458	0.297987	0.225823
	-0.0109159	0.219044	0.211969	0.404528	0.338246		-0.00458003	0.0892939	0.211458	0.297987	0.225823
	-0.0564859	0.219044	0.211969	0.404528	0.22838		-0.0161674	0.184358	0.211458	0.297987	0.225823
	0.0606418	0.168272	0.211969	0.404528	0.22838		0.00462627	0.184358	0.211458	0.297987	0.225823
	0.118747	0.148474	0.211969	0.404528	0.22838		-0.0161674	0.0892939	0.211458	0.297987	0.225823
	-0.0199869	0.0484603	0.286839	0.404528	0.22838		0.0813843	0.164063	0.211458	0.297987	0.225823
	0.108955	0.219044	0.211969	0.404528	0.22838		0.0128405	0.210635	0.158733	0.21527	0.322682
	0.0820792	0.197602	0.211969	0.404528	0.22838		0.0231286	0.263706	0.30848	0.271537	0.244231
	0.0386647	0.219044	0.211969	0.404528	0.22838		0.0919389	0.263706	0.30848	0.271537	0.244231
	0.0178423	0.184358	0.211969	0.404528	0.22838		0.0306008	0.263706	0.30848	0.271537	0.244231
	0.0220605	0.148474	0.219487	0.404528	0.22838		0.0128405	0.210635	0.158733	0.21527	0.322682
	-0.0026025	0.206859	0.211969	0.404528	0.22838		-0.0246913	0.238344	0.30848	0.271537	0.244231
	0.0173331	0.104723	0.169448	0.271669	0.326945		0.0566256	0.280772	0.323509	0.119969	0.244231
	-0.0314546	0.12325	0.166835	0.363465	0.326945		-0.0123798	0.104676	0.18162	0.271537	0.244231
	0.0677048	0.294824	0.246008	0.404528	0.326945		-0.0105635	0.263706	0.30848	0.271537	0.244231
	0.0300801	0.152735	0.194445	0.497405	0.326945		0.060416	0.234031	0.309321	0.264411	0.327089
	0.0157966	0.0736442	0.148159	0.297989	-0.367127		0.0667805	0.148495	0.186497	0.264411	0.327089
	0.00874805	0.184358	0.211459	0.297989	-0.367127		-0.0203665	0.0979114	0.314279	0.264411	0.327089
	0.0902099	0.234074	0.309379	0.264463	0.185654		0.0311382	0.102511	0.315743	0.220522	0.044939
	0.0339459	0.234074	0.309379	0.264463	0.185654		0.0489036	0.234191	0.309321	0.264411	0.185763
	-0.00356338	0.171653	0.309379	0.264463	0.185654		0.00885961	0.234031	0.309321	0.264411	0.185763
	-0.035311	0.140362	0.309379	0.264463	0.185654		0.0653873	0.14633	0.309321	0.264411	0.185763
	0.0948986	0.234074	0.309379	0.264463	0.185654		0.0696844	0.234031	0.309321	0.264411	0.185763
	0.0480119	0.234074	0.309379	0.264463	0.185654		0.0948501	0.234191	0.309321	0.264411	0.185763
	0.0386346	0.234074	0.309379	0.264463	0.185654		-0.0109004	0.100112	0.309321	0.264411	0.185763
	0.0198799	0.140362	0.309379	0.264463	0.185654		0.0582442	0.234031	0.309321	0.264411	0.185763
	-0.022318	0.234074	0.309379	0.264463	0.185654		0.0460422	0.140336	0.309321	0.264411	0.185763
	0.0386346	0.234074	0.309379	0.264463	0.185654		0.0175709	0.234031	0.309321	0.264411	0.185763
	0.0105026	0.234074	0.309379	0.264463	0.185654		-0.080045	0.0901901	0.309321	0.264411	0.185763
	0.0714552	0.234074	0.309379	0.264463	0.185654		0.0907828	0.171621	0.309321	0.264411	0.185763
	-0.00356338	0.234074	0.309379	0.264463	0.185654		0.0462874	0.104676	0.211458	0.297987	0.225823
	0.00581394	0.171653	0.309379	0.264463	0.185654		0.0328132	0.100941	0.212098	0.404784	0.22839
	0.0667666	0.234074	0.309379	0.264463	0.185654		0.0173865	0.0836407	0.145314	0.404784	0.22839
	0.0292573	0.234074	0.309379	0.264463	0.185654		0.0529627	0.104676	0.212098	0.404784	0.22839
	-0.0692047	0.100131	0.309379	0.264463	0.185654		0.00616122	0.0682218	0.0941185	0.404784	0.22839
	-0.0176294	0.171653	0.309379	0.264463	0.185654		0.0402872	0.219175	0.212098	0.404784	0.22839
	-0.064516	0.0822506	0.309379	0.264463	0.185654		-0.0328741	0.0942607	0.101244	0.272886	0.225823
	-0.0457614	0.104601	0.309379	0.264463	0.185654		0.0461408	0.219175	0.212098	0.404784	0.22839
	0.0339459	0.234074	0.309379	0.264463	0.185654		0.051383	0.227001	0.222668	0.404784	0.22839
	0.0620779	0.234074	0.309379	0.264463	0.185654		0.0555117	0.219175	0.238256	0.404784	0.22839
	0.0855212	0.234074	0.309379	0.264463	0.185654		0.0170223	0.231245	0.313208	0.271537	0.244231
	-0.05045	0.171653	0.309379	0.264463	0.22838		0.025342	0.263706	0.30848	0.297987	0.244231
	-0.0129407	0.234074	0.309379	0.264463	0.185654		0.0621159	0.263706	0.30848	0.297987	0.244231
	0.0480119	0.171653	0.309379	0.264463	0.185654		0.0397318	0.265274	0.30848	0.297987	0.244231
	0.0527006	0.234074	0.309379	0.264463	0.185654		0.0545213	0.263706	0.30848	0.297987	0.244231
	0.0855212	0.234074	0.309379	0.264463	0.185654		0.0593179	0.241583	0.371451	0.127448	0.244231
	0.00581394	0.234074	0.309379	0.264463	0.185654		0.00135903	0.263706	0.30848	0.297987	0.244231
	0.0292573	0.234074	0.309379	0.264463	0.185654		-0.0290194	0.263706	0.30848	0.297987	0.244231
	0.0198799	0.234074	0.309379	0.264463	0.185654		-0.0226239	0.0408353	0.371451	0.127448	0.244231
	0.0292573	0.234074	0.309379	0.264463	0.185654		0.0165482	0.263706	0.30848	0.297987	0.244231
	0.0527006	0.171653	0.309379	0.264463	0.185654		0.00135903	0.184358	0.30848	0.297987	0.244231
	0.0808326	0.140362	0.309379	0.264463	0.185654		0.054921	0.241583	0.371451	0.127448	0.244231
	0.0339459	0.234074	0.309379	0.264463	0.185654		0.0625156	0.229738	0.30848	0.297987	0.244231
	0.0198799	0.234074	0.309379	0.264463	0.185654		0.0497247	0.263706	0.30848	0.297987	0.244231
	-0.00356338	0.234074	0.309379	0.264463	0.185654		0.0421301	0.263706	0.30848	0.297987	0.244231
	0.0339459	0.234074	0.309379	0.264463	0.185654		-0.0546012	0.140897	0.136425	0.297987	0.244231
	0.0902099	0.234074	0.309379	0.264463	0.185654		0.0593179	0.263706	0.30848	0.297987	0.244231
	0.0339459	0.234074	0.309379	0.264463	0.185654		0.139261	0.263706	0.30848	0.297987	0.244231
	0.0902099	0.234074	0.309379	0.264463	0.185654		0.063315	0.263706	0.30848	0.297987	0.244231
	-0.0270067	0.234074	0.309379	0.264463	0.185654		-0.0530024	0.184358	0.30848	0.297987	0.244231
	0.0527006	0.234074	0.309379	0.264463	0.185654		0.00935335	0.263706	0.30848	0.297987	0.244231
	0.0221088	0.0675101	0.0870083	0.220519	-0.185741		0.00935335	0.263706	0.30848	0.297987	0.244231
	-0.00543112	0.27983	0.25708	0.220519	-0.185741		-0.047806	0.263706	0.30848	0.297987	0.244231
	-0.00543112	0.226054	0.228535	0.220519	-0.185741		-0.0226239	0.0567331	0.30848	0.297987	0.244231
	0.0323562	0.203746	0.25708	0.220519	-0.185741		-0.0226239	-2.08167e-17	0.0905044	0.297987	0.244231
	-0.0146111	0.0675101	0.25708	0.220519	-0.185741		-0.0166282	0.263706	0.30848	0.297987	0.244231
	-0.0432185	0.159132	0.192052	0.220519	-0.185741		-0.0298188	0.0017464	0.30848	0.119969	0.244231
	0.0874361	0.27983	0.25708	0.220519	-0.185741		0.0547922	0.263706	0.30848	0.119969	0.244231
	0.0129288	0.159132	0.25708	0.220519	-0.185741		-0.0166282	0.263706	0.30848	0.297987	0.244231
	0.0793236	0.0922094	0.100845	0.220519	-0.185741		-0.00743472	0.263706	0.30848	0.297987	0.244231
	0.0415362	0.27983	0.25708	0.220519	-0.185741		-0.00743472	0.263706	0.30848	0.297987	0.244231
	0.0231763	0.0675101	0.25708	0.220519	-0.185741		0.025342	0.318578	0.318168	0.297987	0.244231
	0.00288928	0.12325	0.166835	0.0279804	0.326945		0.0862164	0.123233	0.166811	0.0959595	0.327089
	0.0132081	0.106247	0.166835	0.0279804	0.326945		0.0111505	0.279834	0.309321	0.494429	0.22839
	-0.00134725	-4.16334e-17	0.0171228	0.404528	0.244244		0.155516	0.251136	0.292597	0.404784	0.22839
	-0.0512164	0.219044	0.308455	0.404528	0.244244		0.013707	0.138448	0.222668	0.404784	0.22839
	0.0104037	0.0921145	0.308455	0.404528	0.244244		-0.0508819	0.0730938	0.186497	0.404784	0.22839
	-0.0512164	0.263686	0.308455	0.404528	0.244244		0.0869398	0.219175	0.212098	0.404784	0.22839
	0.0128606	0.225153	0.308455	0.404528	0.244244		-0.0231811	0.196079	0.222668	0.404784	0.22839
	0.0916455	0.263686	0.308455	0.404528	0.244244		0.013422	0.217276	0.275764	0.339715	0.225823
	0.0359681	0.263686	0.308455	0.404528	0.244244		0.0283357	0.219175	0.212098	0.404784	0.22839
	0.0623127	0.263686	0.308455	0.404528	0.244244		0.122255	0.18204	0.212098	0.404784	0.22839
	-0.00315865	0.186135	0.308455	0.404528	0.244244		0.0485645	0.134071	0.212098	0.404784	0.22839
	-0.0184807	0.174996	0.371013	0.281162	0.244244		0.0573661	0.219175	0.212098	0.404784	0.22839
	-0.0396627	0.115253	0.308455	0.404528	0.244244		0.0533159	0.162969	0.212098	0.404784	0.22839
	0.0986509	0.263686	0.308455	0.404528	0.244244		0.0514365	0.18204	0.212098	0.404784	0.22839
	0.2198	0.279178	0.308455	0.404528	0.244244		0.0138795	0.0994857	0.248547	0.468004	0.303481
	-0.0338028	0.310693	0.290103	0.404528	0.244244		0.0667295	0.168373	0.212098	0.404784	0.22839
	0.179361	0.263686	0.308455	0.404528	0.244244		-0.0987057	0.104676	0.275764	0.404784	0.22839
	0.0820174	0.263686	0.308455	0.404528	0.244244		0.0739263	0.197989	0.212098	0.404784	0.22839
	0.189513	0.263686	0.308455	0.404528	0.244244		-0.00579171	0.188352	0.212098	0.404784	0.22839
	-0.000618787	0.263686	0.308455	0.404528	0.244244		-0.0382953	0.133302	0.11598	0.271537	0.225823
	-0.00307572	0.0609438	0.211969	0.404528	0.244244		-0.0399011	0.24549	0.257083	0.271537	0.225823
	-0.0396627	0.219044	0.308455	0.404528	0.244244		0.0436555	0.279834	0.257083	0.271537	0.225823
	-0.0459708	0.263686	0.308455	0.404528	0.244244		0.0611773	0.16173	0.211458	0.297987	0.044939
	0.148551	0.168127	0.211969	0.404528	0.244244		-0.00817308	0.193287	0.212098	0.404784	0.22839
	-0.0108612	0.263686	0.308455	0.404528	0.244244		0.00855016	0.195486	0.212098	0.404784	0.22839
	0.142774	0.263686	0.308455	0.404528	0.244244		0.178639	0.266119	0.30848	0.404784	0.244231
	0.0360511	0.219044	0.211969	0.404528	0.244244		-0.0377536	0.198627	0.190366	0.404784	0.244231
	0.0820174	0.263686	0.308455	0.404528	0.244244		-0.0316618	0.14209	0.141978	0.404784	0.22839
	0.00524103	0.219044	0.308455	0.404528	0.244244		-0.0187905	0.130608	0.119188	0.277456	0.225823
	-0.00307572	0.265672	0.308455	0.404528	0.244244		0.0436364	0.0976259	0.212098	0.404784	0.22839
	0.00716665	0.0921145	0.308455	0.404528	0.244244		0.154647	0.279834	0.257083	0.220522	-0.185621
	0.0123293	0.196006	0.35998	0.0585623	0.330351		-0.0602824	0.0675126	0.257083	0.220522	-0.185621
	0.041828	0.219044	0.308455	0.404528	0.244244		0.0977512	0.279834	0.257083	0.220522	-0.185621
	0.050676	0.263686	0.308455	0.404528	0.244244		0.0083329	0.279834	0.257083	0.220522	-0.185621
	0.041828	0.219044	0.308455	0.404528	0.244244		0.0209852	0.174049	0.203448	0.220522	-0.185621
	0.019866	0.263686	0.308455	0.404528	0.244244		-0.0481899	0.123233	0.166811	0.0279761	0.327089
	0.134009	0.263686	0.308455	0.404528	0.244244		0.0132063	0.123233	0.166811	0.0279761	0.327089
	0.1447	0.186135	0.308455	0.404528	0.244244		0.033841	0.123233	0.166811	0.0279761	0.327089
	0.041828	0.219044	0.308455	0.404528	0.244244		0.0717458	0.09801	0.30848	0.159136	0.244231
	0.134009	0.279178	0.308455	0.404528	0.244244		0.0345316	0.0675126	0.0870116	0.159136	-0.466121
	0.00130684	0.279178	0.308455	0.404528	0.244244		0.00815158	0.104676	0.0941185	0.271537	0.34023
	0.112827	0.265672	0.308455	0.404528	0.244244		0.0593614	0.18448	0.222668	0.404784	0.22839
	-0.0613759	0.263686	0.308455	0.404528	0.244244		-0.0778287	0.122837	0.0941185	0.404784	0.22839
	0.210171	0.331702	0.371013	0.281162	0.244244		0.0832038	0.219175	0.212098	0.404784	0.22839
	-0.00161301	0.279178	0.308455	0.404528	0.244244		0.0881415	0.131852	0.212098	0.404784	0.22839
	-0.0415883	0.263686	0.308455	0.404528	0.244244		-0.0219828	0.227001	0.222668	0.404784	0.34023
	-0.0338858	0.263686	0.308455	0.404528	0.244244		-0.0873656	0.104676	0.185512	0.404784	0.22839
	-0.025569	0.219044	0.211969	0.404528	0.244244		-0.0783864	0.104676	0.185512	0.404784	0.22839
	0.041828	0.219044	0.211969	0.404528	0.244244		0.0380577	0.196079	0.222668	0.404784	0.22839
	-0.0613759	0.263686	0.308455	0.404528	0.244244		-0.055399	0.219175	0.212098	0.404784	0.22839
	-0.0338858	0.19664	0.187127	0.404528	0.244244		0.00102824	0.104676	0.212098	0.404784	0.22839
	-0.00500135	0.219044	0.308455	0.404528	0.244244		0.111557	0.168373	0.212098	0.404784	0.22839
	0.0456792	0.219044	0.308455	0.404528	0.244244		0.0481466	0.189075	0.222668	0.404784	0.22839
	0.0122464	0.263686	0.308455	0.404528	0.244244		0.0432823	0.219175	0.212098	0.404784	0.22839
	-0.00134725	-4.16334e-17	0.308455	0.404528	0.244244		-0.0487688	0.227001	0.222668	0.404784	0.22839
	-0.00134725	-4.16334e-17	-7.63278e-17	0.281162	0.244244		0.00399371	0.189075	0.222668	0.404784	0.22839
	-0.0396627	0.219044	0.308455	0.404528	0.244244		-0.00792751	0.234004	0.202727	0.494429	0.22839
	0.0608355	0.263686	0.308455	0.404528	0.244244		0.0323472	0.219175	0.212098	0.404784	0.22839
	-0.00134725	-4.16334e-17	0.308455	0.404528	0.244244		0.0309344	0.108037	0.212098	0.404784	0.22839
	0.133146	0.263686	0.308455	0.404528	0.244244		0.0956181	0.227001	0.222668	0.404784	0.22839
	-0.000618787	0.202643	0.308455	0.404528	0.244244		-0.0180163	0.0599383	0.212098	0.404784	0.22839
	-0.040974	0.0443453	0.211969	0.404528	0.244244		0.00815158	0.104676	0.0941185	0.404784	0.22839
	0.0608355	0.263686	0.308455	0.404528	0.244244		-0.00934031	0.168373	0.212098	0.404784	0.22839
	0.135238	0.263686	0.308455	0.404528	0.244244		0.0518848	0.219175	0.212098	0.404784	0.22839
	-0.0305658	0.19664	0.187127	0.404528	0.244244		0.0619736	0.128954	0.168358	0.271537	0.34023
	0.0354368	0.19664	0.187127	0.404528	0.244244		0.101895	0.219175	0.212098	0.404784	0.22839
	0.0275685	0.263686	0.308455	0.404528	0.244244		0.031994	0.104676	0.212098	0.404784	0.22839
	0.194766	0.263686	0.308455	0.404528	0.244244		0.0369317	0.234004	0.202727	0.494429	0.22839
	-0.0517477	0.263686	0.308455	0.404528	0.244244		0.0741746	0.140052	0.212098	0.404784	0.22839
	0.210171	0.331702	0.371013	0.281162	0.326945		-0.0254929	0.104676	0.212098	0.404784	0.22839
	0.102502	0.263686	0.308455	0.404528	0.244244		0.134833	0.219175	0.212098	0.404784	0.22839
	0.0359681	0.263686	0.308455	0.404528	0.244244		-0.0363545	0.122837	0.212098	0.404784	0.22839
	-0.0358114	0.225153	0.308455	0.404528	0.244244		-0.055399	0.128954	0.168358	0.271537	0.34023
	-0.0491249	0.225153	0.308455	0.404528	0.244244		0.0565428	0.128954	0.168358	0.271537	0.34023
	0.0456792	0.219044	0.308455	0.404528	0.244244		0.101189	0.189075	0.222668	0.404784	0.22839
	0.150477	0.263686	0.308455	0.404528	0.244244		0.0619736	0.234004	0.202727	0.494429	0.22839
	0.0456792	0.219044	0.211969	0.404528	0.244244		0.0549167	0.108037	0.212098	0.404784	0.22839
	0.1447	0.263686	0.308455	0.404528	0.244244		0.0481466	0.219175	0.212098	0.404784	0.22839
	0.0411308	0.310693	0.290103	0.404528	0.244244		-0.0749367	0.219175	0.212098	0.404784	0.22839
	-0.025569	0.219044	0.211969	0.404528	0.244244		0.0416561	0.104676	0.188299	0.494429	0.22839
	-0.0825578	0.263686	0.308455	0.404528	0.244244		-0.00165043	0.104676	0.222668	0.404784	0.22839
	0.134009	0.263686	0.308455	0.404528	0.244244		0.0704363	0.104676	0.116698	0.404784	0.22839
	0.0157375	0.0816053	0.0941621	0.271669	0.225752		-0.0898897	0.219175	0.212098	0.404784	0.22839
	0.0426942	0.104723	0.0941621	0.271669	0.225752		0.13746	0.227001	0.222668	0.404784	0.22839
	0.0346533	0.234074	0.309379	0.264463	0.185654		0.0602811	0.234004	0.202727	0.494429	0.22839
	0.0789971	0.234074	0.309379	0.264463	0.185654		-0.0105398	0.104676	0.212098	0.404784	0.22839
	0.0544226	0.234074	0.309379	0.264463	0.185654		-0.055399	0.219175	0.212098	0.404784	0.22839
	-0.00256321	0.234074	0.309379	0.264463	0.185654		0.0358721	0.227001	0.222668	0.404784	0.22839
	-0.0185915	0.234074	0.309379	0.264463	0.185654		0.0619736	0.219175	0.212098	0.404784	0.22839
	-0.0417471	0.171653	0.309379	0.264463	0.185654		0.0317807	0.168373	0.212098	0.404784	0.22839
	-0.0152052	0.234074	0.309379	0.264463	0.185654		-0.0329694	0.034039	0.185512	0.404784	0.22839
	0.0983549	0.234074	0.309379	0.264463	0.185654		0.0992829	0.104676	0.222668	0.404784	0.22839
	0.0417806	0.234235	0.309379	0.264463	0.185654		-0.050248	0.104676	0.0941185	0.271537	0.34023
	0.0428448	0.234074	0.309379	0.264463	0.185654		0.00702558	0.189075	0.222668	0.404784	0.22839
	0.0182703	0.234074	0.309379	0.264463	0.185654		-0.0487688	0.0682218	0.185512	0.404784	0.22839
	-0.0730942	0.216941	0.309379	0.264463	0.185654		-0.00764777	0.125453	0.212098	0.404784	0.22839
	0.000917062	0.234074	0.309379	0.264463	0.185654		-0.046723	0.168373	0.212098	0.404784	0.22839
	-0.0171726	0.234074	0.309379	0.264463	0.185654		0.131095	0.219175	0.212098	0.404784	0.22839
	0.0193344	0.234074	0.309379	0.264463	0.185654		0.0257169	0.227001	0.222668	0.404784	0.22839
	-0.0185915	0.171653	0.309379	0.264463	0.185654		-0.0579378	0.209493	0.212098	0.404784	0.22839
	0.00598301	0.234074	0.309379	0.264463	0.185654		-0.0263391	0.189075	0.222668	0.404784	0.22839
	0.0410712	0.234074	0.309379	0.264463	0.185654		0.0367185	0.168373	0.212098	0.404784	0.22839
	-0.044936	0.140362	0.309379	0.264463	0.185654		-0.0898897	0.219175	0.212098	0.404784	0.22839
	0.0268165	0.165253	0.309379	0.264463	0.185654		0.0600678	0.183985	0.202727	0.494429	0.22839
	0.111763	0.145981	0.309379	0.264463	0.185654		0.0956181	0.128954	0.168358	0.271537	0.34023
	0.0353627	0.234074	0.309379	0.264463	0.185654		0.128063	0.216147	0.222668	0.404784	0.22839
	0.0794239	0.234074	0.309379	0.264463	0.185654		0.168691	0.219175	0.212098	0.404784	0.22839
	0.0958456	0.141401	0.185399	0.404528	0.22838		-0.056525	0.219175	0.212098	0.404784	0.22839
	0.100312	0.219044	0.211969	0.404528	0.22838		0.00991758	0.209493	0.212098	0.404784	0.22839
	0.0133023	0.134942	0.211969	0.404528	0.22838		-0.0116658	0.219175	0.212098	0.404784	0.22839
	0.0639697	0.191222	0.226487	0.404528	0.22838		0.020426	0.107807	0.212098	0.404784	0.22839
	0.0961917	0.107789	0.0492259	0.0899094	0.326945		-0.0393863	0.139191	0.222668	0.404784	0.22839
	0.0277568	0.159115	0.309379	0.271669	0.394204		0.04067	0.189075	0.222668	0.404784	0.22839
	-0.0405891	0.175658	0.309379	0.264463	0.326945		-0.0541996	0.168373	0.212098	0.404784	0.22839
	0.110624	0.184358	0.211459	0.297989	-0.367127		-0.0188626	0.104676	0.116698	0.404784	0.22839
	-0.0010878	0.244691	0.377788	0.271669	0.244244		0.179906	0.189075	0.222668	0.404784	0.22839
	0.0907196	0.263686	0.308455	0.271669	0.244244		0.0944186	0.234004	0.202727	0.494429	0.22839
	-0.0655643	0.263686	0.308455	0.271669	0.244244		0.0714959	0.131852	0.212098	0.404784	0.22839
	0.0289498	0.203952	0.308455	0.249379	0.244244		0.0465939	0.104676	0.212098	0.404784	0.22839
	0.0750599	0.263686	0.308455	0.271669	0.244244		0.0768533	0.108037	0.212098	0.404784	0.22839
	-0.0610967	0.219044	0.211969	0.404528	0.22838		0.0657119	0.195486	0.212098	0.404784	0.22839
	0.0168061	0.122515	0.136425	0.404528	0.22838		-0.0946141	0.219175	0.212098	0.404784	0.22839
	0.0343811	0.264742	0.219487	0.404528	0.22838		-0.0422783	0.234004	0.202727	0.494429	0.22839
	-0.0121656	0.184358	0.211969	0.404528	0.22838		0.116142	0.219175	0.212098	0.404784	0.22839
	-0.0250273	0.206859	0.211969	0.404528	0.22838		-0.0333354	0.209493	0.212098	0.404784	0.22839
	0.0301376	0.219044	0.211969	0.404528	0.22838		0.0705762	0.0869345	0.116698	0.404784	0.22839
	0.0740928	0.219044	0.211969	0.404528	0.22838		-0.0386799	0.233689	0.202727	0.494429	0.22839
	-0.0101752	0.219044	0.211969	0.404528	0.22838		0.00864464	0.168373	0.212098	0.404784	0.22839
	-0.0312612	0.184358	0.211459	0.404528	0.22838		-0.0256327	0.139191	0.222668	0.404784	0.22839
	0.0795942	0.184358	0.211969	0.404528	0.22838		0.0855293	0.219175	0.212098	0.404784	0.22839
	0.0518803	0.184358	0.211969	0.404528	0.22838		0.0159541	0.189354	0.211458	0.297987	0.225823
	0.0644794	0.219044	0.211969	0.404528	0.22838		0.104257	0.234191	0.309321	0.264411	0.185763
	0.00679862	0.0594755	0.211969	0.404528	0.22838		-0.0176262	0.171621	0.309321	0.264411	0.185763
	-0.0367625	0.00870373	0.211969	0.404528	0.22838		0.0855056	0.234031	0.309321	0.264411	0.185763
	0.0247676	0.219044	0.211969	0.404528	0.22838		0.0198763	0.234031	0.309321	0.264411	0.185763
	0.10068	0.219044	0.211969	0.404528	0.22838		0.0573788	0.234031	0.314279	0.264411	0.327089
	-0.0889419	0.219044	0.211969	0.404528	0.22838		0.0339397	0.234031	0.309321	0.264411	0.185763
	-0.0275431	0.168821	0.286839	0.404528	0.22838		0.00581288	0.234031	0.309321	0.264411	0.185763
	0.0647421	0.184358	0.211969	0.404528	0.22838		0.0339397	0.234191	0.309321	0.264411	0.185763
	-0.0295335	0.167329	0.286839	0.404528	0.22838		0.0198763	0.145955	0.309321	0.264411	0.185763
	-0.0152825	0.219044	0.211969	0.404528	0.22838		0.0386275	0.234031	0.309321	0.264411	0.185763
	0.0456465	0.184358	0.211969	0.404528	0.22838		0.0292519	0.234031	0.309321	0.264411	0.185763
	0.02304	0.184358	0.211969	0.404528	0.22838		0.0480032	0.234031	0.309321	0.264411	0.185763
	0.0326534	0.184358	0.211969	0.404528	0.22838		0.0808178	0.140336	0.309321	0.264411	0.185763
	0.0343811	0.168821	0.286839	0.404528	0.22838		0.0105007	0.234031	0.309321	0.264411	0.185763
	-0.0601015	0.219044	0.211969	0.404528	0.22838		0.0667544	0.234031	0.309321	0.264411	0.185763
	-0.0441229	0.219044	0.211969	0.404528	0.22838		0.141759	0.234031	0.309321	0.264411	0.185763
	-0.00805348	0.0121357	0.136425	0.404528	0.22838		0.0480032	0.234031	0.309321	0.264411	0.185763
	0.0456465	0.184358	0.211969	0.404528	0.22838		-0.00825054	0.234031	0.309321	0.264411	0.185763
	0.0622263	0.219044	0.211969	0.404528	0.22838		0.0245641	0.234031	0.309321	0.264411	0.185763
	0.0937138	0.184358	0.211969	0.404528	0.22838		0.0948813	0.234031	0.309321	0.264411	0.185763
	-0.0101752	0.264742	0.219487	0.404528	0.22838		0.0620666	0.234031	0.309321	0.264411	0.185763
	-0.00255213	-4.16334e-17	-7.63278e-17	0.0833339	-0.231826		0.0339397	0.171621	0.309321	0.264411	0.185763
	-0.0312612	0.184358	0.211459	0.404528	0.22838		0.127696	0.234031	0.309321	0.264411	0.185763
	0.0548659	0.219044	0.211969	0.404528	0.22838		0.0667544	0.234031	0.309321	0.264411	0.185763
	-0.0291394	0.184358	0.211459	0.404528	0.22838		-0.0176262	0.234191	0.309321	0.264411	0.185763
	0.0260255	0.206859	0.211969	0.404528	0.22838		-0.0410652	0.140336	0.309321	0.264411	0.185763
	-0.0868202	0.219044	0.211969	0.404528	0.22838		0.0198763	0.234031	0.309321	0.264411	0.185763
	0.126272	0.219044	0.211969	0.404528	0.22838		0.0245641	0.234031	0.309321	0.264411	0.185763
	0.00679862	0.1159	0.274677	0.458161	0.22838		0.0808178	0.234031	0.309321	0.264411	0.185763
	0.00892035	0.184358	0.211969	0.404528	0.22838		0.0386275	0.234031	0.309321	0.264411	0.185763
	0.0910666	0.219044	0.211969	0.404528	0.22838		0.0245641	0.234031	0.309321	0.264411	0.185763
	0.0920618	0.219044	0.211969	0.404528	0.22838		0.00581288	0.234031	0.309321	0.264411	0.185763
	0.0093144	0.1159	0.274677	0.458161	0.22838		0.0386275	0.171621	0.309321	0.264411	0.185763
	0.0039444	0.168821	0.286839	0.404528	0.22838		-0.00825054	0.171621	0.309321	0.264411	0.185763
	-0.0101752	0.264742	0.219487	0.404528	0.22838		-0.00356273	0.140336	0.309321	0.264411	0.185763
	-0.0634811	0.184358	0.211969	0.404528	0.22838		-0.00356273	0.234031	0.309321	0.264411	0.185763
	0.0974318	0.219044	0.211969	0.404528	0.22838		-0.0316896	0.234031	0.309321	0.264411	0.185763
	0.0548659	0.219044	0.211969	0.404528	0.22838		0.0339397	0.234031	0.309321	0.264411	0.185763
	-0.0504881	0.184358	0.211969	0.404528	0.22838		0.052691	0.234031	0.309321	0.264411	0.185763
	-0.0367625	0.00870373	0.211969	0.404528	0.22838		0.0151885	0.234031	0.309321	0.264411	0.185763
	0.142231	0.184358	0.211459	0.404528	0.22838		0.0386275	0.234031	0.309321	0.264411	0.185763
	-0.0275431	0.168821	0.286839	0.404528	0.22838		0.0667544	0.234031	0.309321	0.264411	0.185763
	-0.0312612	0.219044	0.211969	0.404528	0.22838		-0.0176262	0.234031	0.309321	0.264411	0.185763
	0.0937138	0.184358	0.211969	0.404528	0.22838		0.113632	0.234031	0.309321	0.264411	0.185763
	0.00679862	0.1159	0.274677	0.458161	0.22838		-0.0879433	0.234191	0.309321	0.264411	0.185763
	-0.0483663	0.219044	0.211969	0.404528	0.22838		0.07613	0.234031	0.309321	0.264411	0.185763
	0.0123	-4.16334e-17	0.00518342	0.458161	0.22838		0.0245641	0.234031	0.309321	0.264411	0.185763
	0.0301376	0.219044	0.211969	0.404528	0.22838		0.0198763	0.234031	0.309321	0.264411	0.22839
	-0.0483663	0.184358	0.211459	0.404528	0.22838		0.0105007	0.234031	0.309321	0.264411	0.185763
	0.0422669	0.184358	0.211969	0.404528	0.22838		0.0714422	0.234031	0.309321	0.264411	0.185763
	-0.00407272	0.184358	0.211969	0.404528	0.22838		-0.045753	0.234031	0.309321	0.264411	0.185763
	0.0090517	0.108939	0.211969	0.404528	0.22838		-0.0176262	0.234031	0.309321	0.264411	0.185763
	-0.0101752	0.0594755	0.211969	0.404528	0.22838		0.0151885	0.140336	0.309321	0.264411	0.185763
	-0.0250273	0.206859	0.211969	0.404528	0.22838		0.0151885	0.234031	0.309321	0.264411	0.185763
	-0.027149	0.00870373	0.211969	0.404528	0.22838		0.052691	0.234031	0.309321	0.264411	0.185763
	0.0560305	0.108939	0.211459	0.404528	0.22838		-0.0129384	0.234031	0.309321	0.264411	0.185763
	0.0343811	0.184358	0.211969	0.404528	0.22838		0.00536888	0.234031	0.309321	0.264411	0.185763
	-0.0729202	0.219044	0.211969	0.404528	0.22838		0.00112507	0.234031	0.309321	0.264411	0.185763
	-0.0889419	0.184358	0.211459	0.404528	0.22838		0.0151885	0.140336	0.309321	0.264411	0.185763
	-0.00805348	0.219044	0.211969	0.404528	0.22838		-0.0316896	0.140336	0.309321	0.264411	0.185763
	0.00892035	0.01679	0.274677	0.458161	0.22838		0.0901934	0.234031	0.309321	0.264411	0.185763
	0.0493646	0.168821	0.286839	0.404528	0.22838		0.00112507	0.234031	0.309321	0.264411	0.185763
	0.0203281	0.219044	0.211969	0.404528	0.22838		0.0339397	0.234031	0.309321	0.264411	0.185763
	0.0343811	0.184358	0.211969	0.404528	0.22838		-0.0176262	0.140336	0.309321	0.264411	0.185763
	0.0168061	0.0170381	0.274677	0.458161	0.22838		0.0808178	0.140336	0.309321	0.264411	0.185763
	-0.00242079	0.122515	0.136425	0.404528	0.22838		-0.0551286	0.0777658	0.309321	0.264411	0.185763
	0.0124719	0.114791	0.185399	0.404528	0.22838		0.0386275	0.234031	0.309321	0.264411	0.185763
	0.000412987	0.164199	0.205528	0.497405	0.22838		0.0480032	0.234031	0.309321	0.264411	0.185763
	0.0475404	0.219044	0.211969	0.404528	0.22838		0.0849841	0.189075	0.222668	0.404784	0.22839
	-0.0288218	0.144415	0.238815	0.304506	0.326945		0.0662489	0.128954	0.212098	0.404784	0.34023
	-0.00856956	0.0391657	0.211969	0.404528	0.22838		0.0357296	0.219175	0.212098	0.404784	0.22839
	0.0471051	0.219044	0.211969	0.404528	0.22838		0.0148125	0.219175	0.212098	0.404784	0.22839
	-0.0194552	0.197602	0.211459	0.297989	0.225752		-0.0759992	0.219175	0.212098	0.404784	0.22839
	-0.0215639	0.184358	0.211459	0.297989	0.225752		0.0400866	0.219175	0.212098	0.404784	0.22839
	0.0169392	0.152832	0.124411	0.271669	0.225752		-0.0500429	0.219175	0.212098	0.404784	0.22839
	-0.0520961	0.128159	0.211459	0.297989	0.225752		0.0766044	0.195486	0.212098	0.404784	0.22839
	-0.00203899	0.0732895	0.211459	0.297989	0.158795		0.1091	0.219175	0.212098	0.404784	0.22839
	-0.00552034	0.0127263	0.0941621	0.297989	0.225752		-0.0385288	0.219175	0.212098	0.404784	0.22839
	0.00554373	0.104723	0.0941621	0.297989	0.225752		0.00295735	-2.08167e-17	0.222668	0.404784	0.22839
	0.00297122	0.184358	0.211459	0.297989	0.225752		0.0727878	0.219175	0.212098	0.404784	0.22839
	-0.0215639	0.184358	0.211459	0.297989	0.225752		0.0131778	0.219175	0.212098	0.404784	0.22839
	-0.00336671	0.0682524	0.15695	0.297989	0.225752		-0.0840377	0.219175	0.222668	0.404784	0.22839
	0.0539229	0.148474	0.211459	0.297989	0.225752		0.110123	0.168373	0.212098	0.404784	0.22839
	-0.000985835	0.0913271	0.185422	0.323384	0.225752		0.0383167	0.219175	0.212098	0.404784	0.22839
	0.0462242	0.163628	0.211459	0.297989	0.225752		-0.0345064	0.219175	0.212098	0.404784	0.22839
	0.0583557	0.163628	0.211459	0.297989	0.225752		0.0626384	0.219175	0.212098	0.404784	0.22839
	0.109658	0.104723	0.18647	0.271669	0.225752		-0.0413221	0.234004	0.212098	0.494429	0.22839
	-0.0318757	0.219044	0.211969	0.404528	0.22838		0.036682	0.219175	0.222668	0.404784	0.22839
	0.182179	0.148474	0.309379	0.264463	0.185654		0.0470756	0.219175	0.212098	0.404784	0.22839
	0.0300861	0.176442	0.342297	0.264463	0.185654		0.0883189	0.221191	0.212098	0.404784	0.22839
	0.0422767	0.263686	0.308455	0.404528	0.244244		-0.0129846	0.0921696	0.212098	0.404784	0.34023
	-0.0257547	0.219044	0.211969	0.404528	0.244244		-0.0518836	0.197989	0.212098	0.404784	0.22839
	0.117005	0.211045	0.308455	0.404528	0.244244		0.0285084	0.219175	0.212098	0.404784	0.22839
	0.0744156	0.219044	0.211969	0.404528	0.244244		-0.0424693	0.195486	0.212098	0.404784	0.22839
	0.0235669	0.09764	0.309379	0.264463	0.185654		0.011337	0.219175	0.212098	0.404784	0.22839
	-0.0107143	0.0778401	0.0827697	0.404528	0.326945		-0.0467734	0.0473907	0.207332	0.404784	0.22839
	0.127013	0.234074	0.309379	0.264463	0.185654		-0.0234043	0.219175	0.222668	0.404784	0.22839
	-0.0220095	0.234074	0.309379	0.264463	0.185654		0.036476	0.0630158	0.116698	0.404784	0.22839
	0.0238436	0.234074	0.309379	0.264463	0.185654		0.0528942	0.234004	0.212098	0.494429	0.22839
	0.0696967	0.234074	0.309379	0.264463	0.185654		0.0667961	0.219175	0.212098	0.494429	0.22839
	0.127013	0.234074	0.309379	0.264463	0.185654		-0.066461	0.219175	0.212098	0.404784	0.22839
	0.0582334	0.234074	0.309379	0.264463	0.244244		0.0863486	0.219175	0.212098	0.404784	0.22839
	-0.00481457	0.234074	0.309379	0.264463	0.185654		0.0876422	0.219175	0.212098	0.404784	0.22839
	0.08116	0.234074	0.309379	0.264463	0.185654		-0.015842	0.219175	0.212098	0.404784	0.22839
	-0.0563993	0.100131	0.309379	0.264463	0.185654		-0.0309666	0.234004	0.212098	0.494429	0.22839
	0.0696967	0.234074	0.309379	0.264463	0.185654		-0.00998534	0.209493	0.212098	0.404784	0.22839
	0.0983549	0.234074	0.309379	0.264463	0.185654		0.0296669	0.227001	0.222668	0.404784	0.22839
	0.0754283	0.234074	0.309379	0.264463	0.185654		-0.066461	0.219175	0.212098	0.404784	0.22839
	0.018112	0.234074	0.309379	0.264463	0.185654		0.0117491	0.219175	0.212098	0.404784	0.22839
	0.0525018	0.234074	0.309379	0.264463	0.185654		0.126541	0.219175	0.212098	0.404784	0.22839
	0.018112	0.234074	0.309379	0.264463	0.185654		0.106512	0.219175	0.212098	0.404784	0.22839
	0.0353069	0.234074	0.309379	0.264463	0.185654		0.0402926	0.234004	0.212098	0.494429	0.22839
	0.0123803	0.234074	0.309379	0.264463	0.185654		0.129676	0.128954	0.212098	0.404784	0.34023
	-0.0965208	0.234235	0.309379	0.264463	0.185654		0.0319129	0.136999	0.212098	0.404784	0.34023
	-0.0162778	0.234074	0.309379	0.264463	0.185654		0.0177408	0.227001	0.222668	0.404784	0.22839
	-0.0162778	0.0420193	0.309379	0.264463	0.185654		0.0484662	0.219175	0.212098	0.404784	0.22839
	-0.0506677	0.234074	0.309379	0.264463	0.185654		-0.0592399	0.219175	0.212098	0.404784	0.22839
	0.127013	0.234074	0.309379	0.264463	0.185654		0.123748	0.168373	0.212098	0.404784	0.22839
	-0.0277411	0.234074	0.309379	0.264463	0.185654		0.0431781	0.219175	0.212098	0.404784	0.22839
	0.0066487	0.234074	0.309379	0.264463	0.185654		0.0221687	0.168373	0.212098	0.404784	0.34023
	0.0410385	0.234074	0.309379	0.264463	0.185654		0.04111	0.234004	0.212098	0.494429	0.22839
	0.0410385	0.234074	0.309379	0.264463	0.185654		-0.0101914	0.0921696	0.212098	0.404784	0.22839
	-0.0506677	0.234074	0.309379	0.264463	0.185654		0.0173355	0.290079	0.293209	0.494429	0.22839
	0.0639651	0.234074	0.309379	0.264463	0.185654		0.0157008	0.0869345	0.212098	0.404784	0.22839
	-0.0277411	0.234074	0.309379	0.264463	0.185654		0.0360707	0.168373	0.212098	0.494429	0.22839
	0.0467702	0.234074	0.309379	0.264463	0.185654		0.112575	0.219175	0.212098	0.404784	0.22839
	0.0754283	0.234074	0.309379	0.264463	0.185654		-0.0371002	0.104676	0.212098	0.404784	0.22839
	-0.0793259	0.171653	0.309379	0.264463	0.185654		-0.0086208	0.219175	0.212098	0.404784	0.22839
	-0.0220095	0.234074	0.309379	0.264463	0.185654		0.0148125	0.227001	0.222668	0.404784	0.22839
	-0.0220095	0.234074	0.309379	0.264463	0.185654		-0.0240865	0.219175	0.212098	0.404784	0.22839
	0.0582334	0.234074	0.309379	0.264463	0.185654		-0.0704128	0.219175	0.212098	0.404784	0.22839
	-0.0277411	0.0598999	0.309379	0.264463	0.185654		0.0646142	0.219175	0.212098	0.404784	0.22839
	0.0754283	0.234074	0.309379	0.264463	0.185654		0.036476	0.219175	0.212098	0.404784	0.22839
	-0.0277411	0.140362	0.309379	0.264463	0.185654		-0.0608746	0.219175	0.212098	0.404784	0.22839
	-0.0793259	0.0598999	0.309379	0.264463	0.185654		-0.0161831	0.219175	0.222668	0.404784	0.22839
	0.0066487	0.234074	0.309379	0.264463	0.185654		0.0504421	0.219175	0.212098	0.404784	0.22839
	-0.0220095	0.234074	0.309379	0.264463	0.185654		-0.0426866	0.104676	0.212098	0.404784	0.22839
	0.0410385	0.234074	0.309379	0.264463	0.185654		0.109988	0.221191	0.212098	0.404784	0.22839
	-0.00481457	0.234074	0.309379	0.264463	0.185654		-0.0157778	0.221191	0.212098	0.404784	0.22839
	-0.0220095	0.171653	0.309379	0.264463	0.185654		0.0508542	0.197989	0.212098	0.404784	0.22839
	-0.0220095	0.234074	0.309379	0.264463	0.185654		0.0255091	0.161897	0.212098	0.404784	0.22839
	0.0066487	0.234074	0.309379	0.264463	0.185654		0.0305484	0.219175	0.212098	0.404784	0.22839
	-0.00839296	0.234074	0.309379	0.271669	0.225752		0.0511243	0.219175	0.212098	0.404784	0.22839
	0.0983549	0.234074	0.309379	0.264463	0.185654		-0.0132548	0.0869345	0.116698	0.404784	0.22839
	0.08116	0.234074	0.309379	0.264463	0.185654		-0.0345064	0.168373	0.212098	0.404784	0.22839
	-0.00481457	0.234074	0.309379	0.264463	0.185654		-0.0658497	0.197989	0.212098	0.404784	0.22839
	-0.0334728	0.171653	0.309379	0.264463	0.185654		0.0895471	0.219175	0.212098	0.404784	0.34023
	0.0410385	0.234074	0.309379	0.264463	0.185654		0.0271439	0.0869345	0.185512	0.404784	0.22839
	-0.0334728	0.0822506	0.309379	0.264463	0.185654		-0.0086208	0.219175	0.212098	0.404784	0.22839
	-0.0334728	0.234074	0.309379	0.264463	0.185654		0.0473077	0.219175	0.212098	0.404784	0.22839
	-0.00481457	0.234074	0.309379	0.264463	0.185654		-0.0187061	0.0682218	0.212098	0.404784	0.22839
	0.018112	0.234074	0.309379	0.264463	0.185654		-0.0201348	0.0869345	0.212098	0.404784	0.22839
	-0.0334728	0.234074	0.309379	0.264463	0.185654		-0.0108415	0.168373	0.212098	0.404784	0.22839
	0.0066487	0.234074	0.309379	0.264463	0.185654		0.0122253	0.219175	0.212098	0.404784	0.22839
	-0.0220095	0.234074	0.309379	0.264463	0.185654		0.0193691	0.100941	0.212098	0.404784	0.22839
	0.0754283	0.234074	0.309379	0.264463	0.185654		0.135056	0.219175	0.212098	0.404784	0.22839
	0.0467702	0.234074	0.309379	0.264463	0.185654		-0.0389409	0.061356	0.212098	0.404784	0.22839
	0.0238436	0.234074	0.309379	0.264463	0.185654		0.00316339	0.227001	0.222668	0.404784	0.22839
	0.0983549	0.234074	0.309379	0.264463	0.185654		-0.018378	0.0976259	0.166811	0.0959595	0.327089
	-0.0105462	0.145981	0.309379	0.264463	0.185654		0.00219074	0.123233	0.201667	0.0959595	0.327089
	0.000917062	0.234074	0.309379	0.264463	0.185654		0.0416371	0.219175	0.212098	0.404784	0.22839
	-0.00481457	0.0777804	0.309379	0.264463	0.185654		-0.0147887	0.148495	0.186497	0.126875	0.044939
	0.0353069	0.234074	0.309379	0.264463	0.185654		-0.00204323	0.168373	0.212098	0.404784	0.22839
	0.0868916	0.234074	0.309379	0.264463	0.185654		-0.0504134	0.184358	0.260719	0.404784	0.22839
	0.0353069	0.234074	0.309379	0.264463	0.185654		-0.0455145	0.199178	0.212098	0.404784	0.22839
	0.0525018	0.234074	0.309379	0.264463	0.185654		-0.0494072	0.148495	0.212395	0.404784	0.22839
	0.0868916	0.234074	0.309379	0.264463	0.185654		0.00431936	0.148495	0.186497	0.404784	0.22839
	-0.00481457	0.234074	0.309379	0.264463	0.185654		-0.0568101	0.184358	0.275764	0.339715	0.175111
	0.0754283	0.234074	0.309379	0.264463	0.185654		-0.0971507	0.219175	0.212098	0.404784	0.22839
	0.0410385	0.234074	0.309379	0.264463	0.185654		0.0417167	0.263706	0.30848	0.271537	0.244231
	0.109818	0.234074	0.309379	0.264463	0.185654		0.034171	0.232056	0.309321	0.271537	0.327089
	-0.0334728	0.234074	0.309379	0.264463	0.185654		0.0259169	0.263706	0.30848	0.404784	0.244231
	0.0696967	0.234074	0.309379	0.264463	0.185654		-0.0672732	0.228937	0.30848	0.404784	0.244231
	-0.044936	0.104601	0.309379	0.264463	0.185654		-0.0625948	0.263706	0.30848	0.404784	0.244231
	0.0926233	0.234074	0.309379	0.264463	0.185654		0.0191551	0.219175	0.272177	0.404784	0.241478
	-0.102252	0.104601	0.309379	0.264463	0.185654		-0.0898617	0.263706	0.30848	0.404784	0.244231
	-0.0105462	0.238036	0.309379	0.264463	0.326945		-0.0322424	0.247528	0.363369	0.404784	0.244231
	-0.0735942	0.171653	0.309379	0.264463	0.185654		0.130878	0.303301	0.212098	0.404784	0.244231
	0.0410385	0.234074	0.309379	0.264463	0.185654		-0.029208	0.148495	0.212098	0.404784	0.244231
	0.0123803	0.234074	0.309379	0.264463	0.185654		0.000974282	0.263706	0.30848	0.404784	0.244231
	-0.0277411	0.234074	0.309379	0.264463	0.185654		0.00606813	0.163078	0.309321	0.264411	0.185763
	0.0353069	0.234074	0.309379	0.264463	0.185654		-0.0299848	0.234031	0.309321	0.264411	0.185763
	0.0983549	0.234074	0.309379	0.264463	0.185654		0.0467619	0.234031	0.309321	0.264411	0.185763
	-0.0277411	0.234074	0.309379	0.264463	0.185654		-0.0576375	0.190051	0.270957	0.264411	0.185763
	-0.0277411	0.234074	0.309379	0.264463	0.185654		0.0683205	0.134922	0.309321	0.264411	0.185763
	-0.0735942	0.100131	0.309379	0.264463	0.185654		-0.0116861	0.125193	0.309321	0.264411	0.185763
	-0.0506677	0.234074	0.309379	0.264463	0.185654		0.0949744	0.234031	0.309321	0.264411	0.185763
	0.08116	0.234074	0.309379	0.264463	0.185654		0.0633713	0.234031	0.309321	0.264411	0.185763
	0.018112	0.234074	0.309379	0.264463	0.185654		0.0302699	0.171621	0.309321	0.264411	0.185763
	0.0696967	0.234074	0.309379	0.264463	0.185654		0.0544716	0.234031	0.309321	0.264411	0.185763
	0.0105026	0.234074	0.309379	0.264463	0.185654		-0.0765865	0.168337	0.309321	0.264411	0.185763
	-0.0220095	0.171653	0.309379	0.264463	0.185654		0.0134695	0.234031	0.309321	0.264411	0.185763
	0.0353069	0.234074	0.309379	0.264463	0.185654		0.0870736	0.134922	0.309321	0.264411	0.185763
	0.0754283	0.234074	0.309379	0.264463	0.185654		0.0453484	0.0727043	0.0998587	0.227529	0.327089
	-0.0392044	0.234074	0.309379	0.264463	0.185654		0.0609016	0.0967086	0.212098	0.404784	0.22839
	-0.0563993	0.100131	0.309379	0.264463	0.185654		0.0263441	0.263706	0.30848	0.159136	0.244231
	0.0582334	0.234074	0.309379	0.264463	0.185654		0.0162052	0.148495	0.186497	0.404784	0.22839
	0.08116	0.234074	0.309379	0.264463	0.185654		-0.0296737	0.148495	0.211458	0.297987	0.225823
	-0.0105462	0.234074	0.309379	0.264463	0.185654		0.0751243	0.210755	0.186497	0.297987	0.225823
	0.0926233	0.234074	0.309379	0.264463	0.185654		-0.0276092	0.184358	0.211458	0.297987	0.225823
	0.0983549	0.234074	0.309379	0.264463	0.185654		0.0065815	0.199178	0.211458	0.297987	0.225823
	-0.0334728	0.0822506	0.309379	0.264463	0.185654		-0.0254476	0.184358	0.211458	0.297987	0.225823
	-0.0277411	0.234074	0.309379	0.264463	0.185654		0.0073235	0.184358	0.211458	0.297987	0.165014
	-0.0220095	0.171653	0.309379	0.264463	0.185654		0.0565277	0.16173	0.211458	0.297987	0.225823
	-0.0793259	0.171653	0.309379	0.264463	0.185654		-0.0254476	0.184358	0.211458	0.297987	0.225823
	0.0066487	0.234074	0.309379	0.264463	0.185654		0.0286762	0.184358	0.211458	0.297987	0.225823
	0.018112	0.234074	0.309379	0.264463	0.185654		-0.00194145	0.104676	0.162916	0.297987	0.225823
	0.127013	0.234074	0.309379	0.264463	0.185654		0.0188289	0.152389	0.186497	0.297987	0.225823
	-0.0735942	0.100131	0.309379	0.264463	0.185654		0.0551122	0.176591	0.211458	0.297987	0.225823
	-0.0392044	0.234074	0.309379	0.264463	0.185654		0.0759129	0.157915	0.299231	0.297987	0.225823
	0.0123803	0.234074	0.309379	0.264463	0.185654		0.0743297	0.148495	0.211458	0.297987	0.225823
	0.11555	0.234074	0.309379	0.264463	0.185654		-0.0247481	0.0161427	0.257218	0.468004	0.303481
	0.0868916	0.234074	0.309379	0.264463	0.185654		-0.0133759	0.119715	0.18548	0.271537	0.244231
	0.0353069	0.234074	0.309379	0.264463	0.185654		0.0682012	0.172745	0.323509	0.126875	0.244231
	0.0238436	0.234074	0.309379	0.264463	0.185654		0.0441696	0.148495	0.186497	0.271537	0.244231
	-0.0506677	0.234074	0.309379	0.264463	0.185654		-0.0157576	0.271129	0.30848	0.271537	0.244231
	0.14994	0.234074	0.309379	0.264463	0.185654		0.10081	0.148495	0.186497	0.271537	0.244231
	0.0582334	0.234074	0.309379	0.264463	0.185654		0.142232	0.184358	0.211458	0.404784	0.22839
	-0.0105462	0.234074	0.309379	0.264463	0.185654		0.136493	0.219175	0.212098	0.404784	0.22839
	-0.0220095	0.234074	0.309379	0.264463	0.185654		0.0156747	0.219175	0.212098	0.404784	0.22839
	-0.0220095	0.171653	0.309379	0.264463	0.185654		0.102269	0.172542	0.281415	0.404784	0.22839
	-0.0563993	0.0822506	0.309379	0.264463	0.185654		0.0234177	0.219175	0.212098	0.404784	0.22839
	0.0123803	0.234074	0.309379	0.264463	0.185654		0.0880629	0.219175	0.212098	0.404784	0.22839
	0.0754283	0.234074	0.309379	0.264463	0.185654		-0.0108506	0.114755	0.212098	0.404784	0.22839
	0.0123803	0.234074	0.309379	0.264463	0.185654		0.0254717	0.184358	0.212098	0.404784	0.22839
	0.0066487	0.234074	0.309379	0.264463	0.185654		-0.0265636	0.00870893	0.212098	0.404784	0.22839
	-0.00481457	0.234074	0.309379	0.264463	0.185654		0.0872107	0.219175	0.212098	0.404784	0.22839
	0.0295752	0.234074	0.309379	0.264463	0.185654		-0.0417743	0.219175	0.212098	0.404784	0.22839
	0.0238436	0.234074	0.309379	0.264463	0.185654		-0.0146533	0.059511	0.212098	0.404784	0.22839
	0.0066487	0.234074	0.309379	0.264463	0.185654		0.0482876	0.125127	0.270522	0.444863	0.22839
	0.0467702	0.234074	0.309379	0.264463	0.185654		-0.0246623	0.184358	0.212098	0.404784	0.22839
	-0.0334728	0.234074	0.309379	0.264463	0.185654		-0.0455769	0.219175	0.212098	0.404784	0.22839
	-0.0277411	0.234074	0.309379	0.264463	0.185654		-0.0398729	0.184358	0.212098	0.404784	0.22839
	0.0983549	0.234235	0.309379	0.264463	0.185654		0.0332741	0.114755	0.211458	0.404784	0.22839
	-0.0334728	0.171653	0.309379	0.264463	0.185654		0.0482876	0.0969743	0.0998587	0.109478	-0.250854
	-0.00481457	0.234074	0.309379	0.264463	0.185654		-0.0640878	0.106767	0.212098	0.404784	0.22839
	0.0467702	0.234074	0.309379	0.264463	0.185654		0.058144	0.219175	0.212098	0.404784	0.22839
	0.0868916	0.234074	0.309379	0.264463	0.185654		-0.0424216	0.219175	0.212098	0.404784	0.22839
	-0.0162778	0.234074	0.309379	0.264463	0.185654		-0.0160078	-2.08167e-17	0.185512	0.404784	0.22839
	0.0410385	0.234074	0.309379	0.264463	0.185654		0.01166	0.0969743	0.0998587	0.109478	-0.250854
	-0.0850575	0.145981	0.309379	0.264463	0.185654		0.0908607	0.0969743	0.0998587	0.109478	-0.250854
	0.0295752	0.234074	0.309379	0.264463	0.185654		0.00575894	0.219175	0.212098	0.404784	0.22839
	-0.0334728	0.00755076	0.20401	0.264463	0.185654		0.0218661	0.172542	0.281415	0.404784	0.22839
	0.0868916	0.234074	0.309379	0.264463	0.185654		-0.0108506	0.131054	0.136425	0.404784	0.22839
	0.0066487	0.234074	0.309379	0.264463	0.185654		0.0908607	0.0969743	0.0998587	0.109478	-0.250854
	0.000917062	0.00755076	0.116264	0.264463	0.185654		0.0778567	0.219175	0.212098	0.404784	0.22839
	0.018112	0.234074	0.309379	0.264463	0.185654		0.0567895	0.0969743	0.0998587	0.109478	-0.250854
	0.0525018	0.234074	0.309379	0.264463	0.185654		0.0872107	0.172542	0.281415	0.404784	0.22839
	-0.00481457	0.0777804	0.309379	0.264463	0.185654		-0.0417743	0.219175	0.212098	0.404784	0.22839
	0.0238436	0.234074	0.309379	0.264463	0.185654		0.151703	0.219175	0.212098	0.404784	0.22839
	0.0066487	0.234074	0.309379	0.264463	0.185654		0.0234177	0.219175	0.212098	0.404784	0.22839
	-0.0334728	0.234074	0.309379	0.264463	0.185654		0.0247722	0.219175	0.212098	0.404784	0.22839
	-0.0220095	0.171653	0.309379	0.264463	0.185654		0.127139	0.237738	0.212098	0.404784	0.22839
	-0.0277411	0.234074	0.309379	0.264463	0.185654		0.0149159	0.168373	0.212098	0.404784	0.22839
	0.0410385	0.234074	0.309379	0.264463	0.185654		0.0466788	0.131054	0.136425	0.404784	0.22839
	-0.044936	0.234074	0.309379	0.264463	0.185654		0.0883564	0.184358	0.211458	0.404784	0.22839
	-0.0678626	0.0822506	0.309379	0.264463	0.185654		0.061794	0.184358	0.211458	0.404784	0.22839
	0.08116	0.234074	0.309379	0.264463	0.185654		0.107973	0.114755	0.212098	0.404784	0.22839
	-0.0277411	0.234074	0.309379	0.264463	0.185654		-0.0146533	0.00893796	0.136425	0.404784	0.22839
	-0.0563993	0.100131	0.309379	0.264463	0.185654		0.00180362	0.184358	0.212098	0.404784	0.22839
	-0.044936	0.140362	0.309379	0.264463	0.185654		0.0120097	0.237738	0.212098	0.404784	0.22839
	0.0238436	0.234074	0.309379	0.264463	0.185654		0.0135613	0.184358	0.211458	0.404784	0.22839
	0.08116	0.234074	0.309379	0.264463	0.185654		0.00293133	0.258483	0.212395	0.404784	0.22839
	0.0353069	0.234074	0.309379	0.264463	0.185654		-0.062496	0.184358	0.211458	0.404784	0.22839
	-0.0506677	0.234074	0.309379	0.264463	0.185654		0.0313727	0.184358	0.211458	0.404784	0.22839
	-0.0850575	0.145981	0.309379	0.264463	0.185654		-0.0869037	0.219175	0.212098	0.404784	0.22839
	0.0754283	0.234074	0.309379	0.264463	0.185654		0.0979192	0.219175	0.212098	0.404784	0.22839
	0.0639651	0.234074	0.309379	0.264463	0.185654		0.17642	0.219175	0.212098	0.404784	0.22839
	-0.0277411	0.234074	0.309379	0.264463	0.185654		0.0102611	0.219175	0.212098	0.404784	0.22839
	0.0532855	0.234074	0.309914	0.271669	0.225752		0.00215336	0.131054	0.136425	0.404784	0.22839
	0.08116	0.234074	0.309379	0.264463	0.185654		0.0285749	0.219175	0.212098	0.404784	0.22839
	-0.0220095	0.234074	0.309379	0.264463	0.185654		-0.04007	0.184358	0.212098	0.404784	0.22839
	-0.0105462	0.145981	0.309379	0.264463	0.185654		0.0872107	0.219175	0.212098	0.404784	0.22839
	0.08116	0.234074	0.309379	0.264463	0.185654		0.0348257	0.219175	0.212098	0.404784	0.22839
	0.0295752	0.234074	0.309379	0.264463	0.185654		0.0156747	0.219175	0.212098	0.404784	0.22839
	0.0410385	0.234074	0.309379	0.264463	0.185654		0.0486374	0.219175	0.212098	0.404784	0.22839
	-0.0621309	0.234074	0.309379	0.264463	0.185654		0.0827086	0.219175	0.212098	0.404784	0.22839
	0.0525018	0.234074	0.309379	0.264463	0.185654		-0.017057	0.15328	0.212098	0.404784	0.22839
	-0.044936	0.104601	0.309379	0.264463	0.185654		0.0247722	0.114755	0.212098	0.404784	0.22839
	0.08116	0.234074	0.309379	0.264463	0.185654		0.0788583	0.172542	0.281415	0.404784	0.22839
	-0.0105462	0.234074	0.309379	0.264463	0.185654		0.00167943	0.00893796	0.0304344	0.404784	0.22839
	-0.0735942	0.171653	0.309379	0.264463	0.185654		-0.0341689	0.219175	0.212098	0.404784	0.22839
	-0.0735942	0.140362	0.309379	0.264463	0.185654		0.117632	0.258483	0.212395	0.404784	0.22839
	0.0868916	0.234074	0.309379	0.264463	0.185654		-0.0146533	0.00893796	0.136425	0.404784	0.22839
	-0.0735942	0.171653	0.309379	0.264463	0.185654		0.0247722	0.219175	0.212098	0.404784	0.22839
	0.0582334	0.234074	0.309379	0.264463	0.185654		-0.0139538	0.0921696	0.212098	0.404784	0.22839
	0.0582334	0.234074	0.309379	0.264463	0.185654		0.0190682	0.219175	0.212098	0.404784	0.22839
	0.11555	0.234074	0.309379	0.264463	0.185654		0.0285749	0.219175	0.212098	0.404784	0.22839
	0.0353069	0.234074	0.309379	0.264463	0.185654		0.0187185	0.219175	0.212098	0.404784	0.22839
	0.0353069	0.234074	0.309379	0.264463	0.185654		-0.0341689	0.219175	0.212098	0.404784	0.22839
	-0.0563993	0.0822506	0.309379	0.264463	0.185654		-0.0146533	0.125127	0.270522	0.444863	0.22839
	-0.0506677	0.234074	0.309379	0.264463	0.185654		-0.0564825	0.184358	0.212098	0.404784	0.22839
	-0.0563993	0.0822506	0.309379	0.264463	0.185654		-0.000797171	-2.08167e-17	-4.85723e-17	0.109478	-0.250854
	0.0238436	0.234074	0.309379	0.264463	0.185654		0.0531395	0.219175	0.212098	0.404784	0.22839
	0.0238436	0.234074	0.309379	0.264463	0.185654		0.0247722	0.219175	0.212098	0.404784	0.22839
	0.0467702	0.234074	0.309379	0.264463	0.185654		0.0135613	0.172542	0.281415	0.404784	0.22839
	0.0926233	0.234074	0.309379	0.264463	0.185654		0.0975695	0.219175	0.212098	0.404784	0.22839
	-0.0793259	0.234074	0.309379	0.264463	0.185654		0.102269	0.258483	0.212395	0.404784	0.22839
	-0.0621309	0.147307	0.309379	0.271669	0.225752		0.100367	0.125127	0.270522	0.444863	0.22839
	-0.044936	0.104601	0.309379	0.264463	0.185654		-0.0246623	-2.08167e-17	0.281415	0.404784	0.22839
	0.0754283	0.234074	0.309379	0.264463	0.185654		0.0313727	0.131054	0.136425	0.404784	0.22839
	-0.0678626	0.0956429	0.309379	0.264463	0.185654		0.0975695	0.219175	0.212098	0.404784	0.22839
	0.0066487	0.234074	0.309379	0.264463	0.185654		0.0389781	0.0969743	0.0998587	0.109478	-0.250854
	0.000917062	0.234074	0.309379	0.264463	0.185654		0.0586908	0.184358	0.212098	0.404784	0.22839
	0.104087	0.234074	0.309379	0.264463	0.185654		0.0182161	0.219175	0.212098	0.404784	0.22839
	-0.0506677	0.234074	0.309379	0.264463	0.185654		0.0484847	0.184358	0.212098	0.404784	0.22839
	-0.0220095	0.234074	0.309379	0.264463	0.185654		-0.0277655	0.184358	0.211458	0.404784	0.22839
	-0.0162778	0.234074	0.309379	0.264463	0.185654		0.0510855	0.184358	0.212098	0.404784	0.22839
	0.000917062	0.234074	0.309379	0.264463	0.185654		-0.0139538	0.184358	0.212098	0.404784	0.22839
	0.0525018	0.234074	0.309379	0.264463	0.185654		-0.017057	0.184358	0.212098	0.404784	0.22839
	0.0123803	0.234074	0.309379	0.264463	0.185654		0.0975695	0.219175	0.212098	0.404784	0.22839
	0.0754283	0.234074	0.309379	0.264463	0.185654		-0.0146533	0.125127	0.270522	0.444863	0.22839
	0.109818	0.234074	0.309379	0.264463	0.185654		0.0215164	0.131054	0.136425	0.404784	0.22839
	0.0983549	0.234074	0.309379	0.264463	0.185654		-0.011353	0.219175	0.212098	0.404784	0.22839
	-0.0162778	0.140362	0.309379	0.264463	0.185654		0.0332741	0.114755	0.211458	0.404784	0.22839
	0.0525018	0.234074	0.309379	0.264463	0.185654		0.0496866	0.219175	0.212098	0.404784	0.22839
	0.0467702	0.234074	0.309379	0.264463	0.185654		0.0693993	0.219175	0.212098	0.404784	0.22839
	0.0525018	0.234074	0.309379	0.264463	0.185654		-2.86229e-17	-2.08167e-17	-4.85723e-17	-5.55112e-17	-0.250854
	0.08116	0.234074	0.309379	0.264463	0.185654		0.0332741	0.114755	0.211458	0.404784	0.22839
	0.0353069	0.234074	0.309379	0.264463	0.185654		0.0182161	0.219175	0.212098	0.404784	0.22839
	-0.0334728	0.171653	0.309379	0.264463	0.185654		0.0462163	0.104676	0.212098	0.404784	0.22839
	0.0983549	0.234074	0.309379	0.264463	0.185654		0.046672	0.168373	0.212098	0.404784	0.22839
	-0.0563993	0.100131	0.309379	0.264463	0.185654		0.0237024	0.13428	0.168358	0.271537	0.34023
	0.0295752	0.234074	0.309379	0.264463	0.185654		-0.0384381	0.0853493	0.185512	0.404784	0.22839
	-0.0334728	0.234074	0.309379	0.264463	0.185654		0.0306327	0.263706	0.30848	0.404784	0.244231
	0.0123803	0.234074	0.309379	0.264463	0.185654		-0.00998216	0.0903427	0.30848	0.404784	0.244231
	-0.0392044	0.234074	0.309379	0.264463	0.185654		-0.0288349	0.219175	0.212098	0.404784	0.244231
	0.0467702	0.234074	0.309379	0.264463	0.185654		-0.021646	0.00870893	0.212098	0.404784	0.244231
	-0.0621309	0.234074	0.309379	0.264463	0.185654		0.0409202	0.219175	0.30848	0.404784	0.244231
	-0.044936	0.104601	0.309379	0.264463	0.185654		-0.0410077	0.263706	0.30848	0.404784	0.244231
	-0.0334728	0.171653	0.309379	0.264463	0.185654		0.0207174	0.263706	0.30848	0.404784	0.244231
	0.018112	0.234074	0.309379	0.264463	0.185654		0.0524411	0.188343	0.30848	0.404784	0.244231
	0.11555	0.234074	0.309379	0.264463	0.185654		0.154083	0.263706	0.30848	0.404784	0.244231
	0.0238436	0.234074	0.309379	0.264463	0.185654		-0.0307202	-2.08167e-17	0.190366	0.404784	0.244231
	0.018112	0.234074	0.309379	0.264463	0.185654		0.0995729	0.263706	0.30848	0.404784	0.244231
	-0.0220095	0.171653	0.309379	0.264463	0.185654		0.144168	0.263706	0.30848	0.404784	0.244231
	-0.0277411	0.140362	0.309379	0.264463	0.185654		0.0903159	0.219175	0.212098	0.404784	0.244231
	-0.0162778	0.0420193	0.309379	0.264463	0.185654		0.114655	0.263706	0.30848	0.404784	0.244231
	0.000917062	0.234074	0.309379	0.264463	0.185654		-0.00260404	0.263706	0.30848	0.404784	0.244231
	-0.0162778	0.0420193	0.309379	0.264463	0.185654		-0.0463375	0.263706	0.30848	0.404784	0.244231
	0.0295752	0.234074	0.309379	0.264463	0.185654		0.166791	0.263706	0.30848	0.404784	0.244231
	0.0410385	0.234074	0.309379	0.264463	0.185654		-0.0410077	-2.08167e-17	0.190366	0.404784	0.244231
	0.0066487	0.234074	0.309379	0.264463	0.185654		-0.0391224	0.263706	0.30848	0.404784	0.244231
	-0.102252	0.104601	0.309379	0.264463	0.185654		0.215808	0.263706	0.30848	0.404784	0.244231
	0.0295752	0.234074	0.309379	0.264463	0.185654		0.0303067	0.263706	0.30848	0.404784	0.244231
	-0.0220095	0.234074	0.309379	0.264463	0.185654		-0.0215399	0.170713	0.212098	0.404784	0.244231
	-0.0392044	0.234074	0.309379	0.264463	0.185654		0.0409202	0.219175	0.30848	0.404784	0.244231
	0.0696967	0.234074	0.309379	0.264463	0.185654		0.00698528	0.219175	0.212098	0.404784	0.244231
	-0.00481457	0.234074	0.309379	0.264463	0.185654		-0.0353518	0.219175	0.30848	0.404784	0.244231
	-0.00481457	0.234074	0.309379	0.264463	0.185654		0.144168	0.263706	0.30848	0.404784	0.244231
	0.0525018	0.234074	0.309379	0.264463	0.185654		0.00510001	0.219175	0.30848	0.404784	0.244231
	-0.0392044	0.234074	0.309379	0.264463	0.185654		-0.0125753	0.0902518	0.30848	0.404784	0.244231
	-0.0793259	0.234074	0.309379	0.264463	0.185654		0.0207174	0.263706	0.30848	0.404784	0.244231
	0.0123803	0.234074	0.309379	0.264463	0.185654		0.0788349	0.263706	0.30848	0.404784	0.244231
	-0.0392044	0.234074	0.309379	0.264463	0.185654		-0.00674684	0.263706	0.30848	0.404784	0.244231
	-0.0735942	0.171653	0.309379	0.264463	0.185654		-0.00260404	0.263706	0.30848	0.404784	0.244231
	-0.0277411	0.0598999	0.309379	0.264463	0.185654		0.0407572	0.310286	0.291175	0.404784	0.244231
	0.11555	0.234074	0.309379	0.264463	0.185654		-0.00928398	0.245641	0.359581	0.054497	0.329056
	-0.00481457	0.234074	0.309379	0.264463	0.185654		0.00682232	0.263706	0.30848	0.404784	0.244231
	-0.0162778	0.0420193	0.309379	0.264463	0.185654		-0.0410077	0.263706	0.30848	0.404784	0.244231
	0.0295752	0.234074	0.309379	0.264463	0.185654		-0.0288349	0.219175	0.212098	0.404784	0.244231
	-0.0735942	0.140362	0.309379	0.264463	0.185654		0.000142382	0.263706	0.30848	0.404784	0.244231
	0.0353069	0.234074	0.309379	0.264463	0.185654		0.00698528	0.219175	0.212098	0.404784	0.244231
	-0.0678626	0.0822506	0.309379	0.264463	0.185654		0.134741	0.263706	0.30848	0.404784	0.244231
	0.14994	0.234074	0.309379	0.264463	0.185654		0.0220675	0.00966406	0.190366	0.404784	0.244231
	0.0467702	0.234074	0.309379	0.264463	0.185654		-0.0307202	-2.08167e-17	0.30848	0.404784	0.244231
	0.0410385	0.234074	0.309379	0.264463	0.185654		-0.0252808	0.310286	0.291175	0.404784	0.244231
	0.14994	0.234074	0.309379	0.264463	0.185654		0.10318	0.263706	0.30848	0.404784	0.244231
	0.0410385	0.234074	0.309379	0.264463	0.185654		0.146053	0.263706	0.30848	0.404784	0.244231
	-0.0105462	0.234074	0.309379	0.264463	0.185654		0.0844907	0.263706	0.30848	0.404784	0.244231
	-0.0506677	0.140362	0.309379	0.264463	0.185654		-0.0288349	0.219175	0.212098	0.404784	0.244231
	0.0410385	0.234074	0.309379	0.264463	0.185654		0.00682232	0.263706	0.30848	0.404784	0.244231
	0.0066487	0.234074	0.309379	0.264463	0.185654		-0.0278108	0.219175	0.30848	0.404784	0.244231
	-0.0220095	0.00755076	0.309379	0.264463	0.185654		-0.0175232	0.219175	0.212098	0.404784	0.244231
	0.08116	0.234074	0.309379	0.264463	0.185654		-0.00809689	-2.08167e-17	0.359581	0.054497	0.329056
	0.00973253	0.191299	0.251956	0.404528	0.326945		-0.0492469	0.226542	0.30848	0.404784	0.244231
	0.0269025	0.12325	0.166835	0.126856	0.326945		-0.0492469	0.226542	0.30848	0.404784	0.244231
	0.10073	0.135361	0.309379	0.264463	0.185654		0.00989467	0.219175	0.212098	0.404784	0.244231
	0.0588565	0.165253	0.18647	0.264463	0.185654		0.0826054	0.263706	0.30848	0.404784	0.244231
	0.0301194	0.210437	0.211928	0.264463	0.185654		-0.0410077	0.263706	0.30848	0.404784	0.244231
	-0.00605497	0.12325	0.166835	0.0279804	0.326945		-0.0312554	0.245641	0.359581	0.054497	0.329056
	-0.0186695	0.12325	0.166835	0.0279804	0.326945		0.0652657	0.198627	0.190366	0.404784	0.244231
	0.0317886	0.12325	0.166835	0.0279804	0.326945		0.146053	0.188343	0.30848	0.404784	0.244231
	-0.00605497	0.0540082	0.166835	0.0279804	0.326945		-0.0307202	0.0389209	0.30848	0.404784	0.244231
	0.00655955	0.12325	0.166835	0.0279804	0.326945		-0.0391224	0.263706	0.30848	0.404784	0.244231
	0.12009	0.12325	0.166835	0.0279804	0.326945		-0.00825986	0.263706	0.30848	0.404784	0.244231
	-0.00605497	0.12325	0.166835	0.0279804	0.326945		-0.0231791	-2.08167e-17	0.101885	0.404784	0.244231
	-0.056513	0.0540082	0.166835	0.0279804	0.326945		0.0433407	0.263706	0.30848	0.404784	0.244231
	-0.031284	0.12325	0.166835	0.0279804	0.326945		0.00167943	0.00966406	0.0363975	0.404784	0.244231
	0.0191741	0.12325	0.166835	0.0279804	0.326945		-0.0282404	0.310286	0.291175	0.404784	0.244231
	0.0570176	0.12325	0.166835	0.0279804	0.326945		0.0426425	0.263706	0.30848	0.404784	0.244231
	-0.00605497	0.12325	0.166835	0.0279804	0.326945		0.146053	0.204504	0.30848	0.404784	0.244231
	0.0822467	0.12325	0.166835	0.0279804	0.326945		0.00202765	0.188343	0.30848	0.404784	0.244231
	-0.00427342	0.0540082	0.166835	0.0279804	0.326945		-0.0341648	0.310286	0.291175	0.404784	0.244231
	-0.0691276	0.12325	0.166835	0.0279804	0.326945		0.146053	0.188343	0.30848	0.404784	0.244231
	0.000195166	0.153692	0.166835	0.0961292	0.412223		0.0843277	0.263706	0.30848	0.404784	0.244231
	-0.0186695	0.0767339	0.166835	0.0279804	0.326945		0.0755532	0.263706	0.30848	0.404784	0.244231
	0.0444031	0.12325	0.166835	0.0279804	0.326945		0.120148	0.263706	0.30848	0.404784	0.244231
	0.0444031	0.12325	0.166835	0.0279804	0.326945		-0.0101451	0.263706	0.30848	0.404784	0.244231
	0.0335101	0.12325	0.166835	0.0279804	0.326945		-0.00022987	0.170713	0.212098	0.404784	0.244231
	0.00655955	0.0263117	-7.63278e-17	0.0279804	0.326945		-0.0410077	0.0903427	0.30848	0.404784	0.244231
	-0.00605497	0.12325	0.166835	0.0279804	0.326945		-0.0288349	0.219175	0.212098	0.404784	0.244231
	-0.0186695	0.12325	0.166835	0.0279804	0.326945		0.00202765	0.188343	0.30848	0.404784	0.244231
	0.0822467	0.12325	0.166835	0.0279804	0.326945		0.146053	0.263706	0.30848	0.404784	0.244231
	-0.0186695	0.12325	0.166835	0.0279804	0.326945		0.0637527	0.263706	0.30848	0.404784	0.244231
	0.0696321	0.12325	0.166835	0.0279804	0.326945		0.11277	0.263706	0.30848	0.404784	0.244231
	0.00655955	0.125922	0.166835	0.0279804	0.326945		0.0510447	0.263706	0.30848	0.404784	0.244231
	0.0135325	0.12325	0.166835	0.0279804	0.326945		0.0303067	0.263706	0.30848	0.404784	0.244231
	0.0822467	0.12325	0.166835	0.0279804	0.326945		0.025675	0.26621	0.30848	0.404784	0.244231
	-0.0186695	0.106247	0.166835	0.0279804	0.326945		-0.00022987	0.170713	0.212098	0.404784	0.244231
	0.00655955	0.12325	0.166835	0.0279804	0.326945		0.0249768	0.263706	0.30848	0.404784	0.244231
	0.00655955	0.125922	0.166835	0.0279804	0.326945		0.025675	0.263706	0.30848	0.404784	0.244231
	0.170548	0.12325	0.166835	0.0279804	0.326945		-0.0288349	0.219175	0.30848	0.404784	0.244231
	0.0191741	0.12325	0.166835	0.0279804	0.326945		0.0923577	0.310286	0.291175	0.404784	0.244231
	0.0191741	0.12325	0.166835	0.0279804	0.326945		0.0755532	0.263706	0.30848	0.404784	0.244231
	0.12009	0.12325	0.166835	0.0279804	0.326945		0.0117799	-2.08167e-17	0.359581	0.054497	0.329056
	0.0191741	0.12325	0.166835	0.0279804	0.326945		-0.0183844	0.263706	0.30848	0.404784	0.244231
	0.0570176	0.125922	0.166835	0.0279804	0.326945		0.0961283	0.330855	0.370382	0.278017	0.244231
	0.0444031	0.12325	0.166835	0.0279804	0.326945		-0.0511322	0.263706	0.30848	0.404784	0.244231
	0.0444031	0.12325	0.166835	0.0279804	0.326945		0.0220675	0.168373	0.30848	0.404784	0.244231
	0.0444031	0.12325	0.166835	0.0279804	0.326945		-0.00825986	0.263706	0.30848	0.404784	0.244231
	0.145319	0.12325	0.166835	0.0279804	0.326945		0.0124781	0.263706	0.30848	0.404784	0.244231
	-0.00605497	0.12325	0.166835	0.0279804	0.326945		-0.0051875	0.188343	0.30848	0.404784	0.244231
	0.0191741	0.125922	0.166835	0.0279804	0.326945		-0.0161732	0.263706	0.30848	0.404784	0.244231
	0.0191741	0.12325	0.166835	0.0279804	0.326945		0.0344032	0.263706	0.30848	0.404784	0.244231
	0.0822467	0.12325	0.166835	0.0279804	0.326945		0.0843277	0.204504	0.30848	0.404784	0.244231
	0.00655955	0.0570586	0.166835	0.0279804	0.326945		-0.0444523	0.330855	0.370382	0.278017	0.244231
	-0.0438985	0.12325	0.166835	0.0279804	0.326945		-0.00448931	0.263706	0.30848	0.404784	0.327089
	0.00655955	0.12325	0.166835	0.0279804	0.326945		-0.0161732	0.263706	0.30848	0.404784	0.244231
	0.107476	0.12325	0.166835	0.0279804	0.326945		-0.000555804	0.0017464	0.30848	0.404784	0.244231
	0.145319	0.12325	0.166835	0.0279804	0.326945		0.00768347	0.170713	0.212098	0.404784	0.244231
	-0.0186695	0.12325	0.166835	0.0279804	0.326945		0.0249768	0.263706	0.30848	0.404784	0.244231
	0.0444031	0.12325	0.166835	0.0279804	0.326945		-0.0195715	0.170713	0.212098	0.404784	0.244231
	0.00655955	0.12325	0.166835	0.0279804	0.326945		-0.0519934	0.26621	0.30848	0.404784	0.244231
	0.0822467	0.12325	0.166835	0.0279804	0.326945		-0.0307202	-2.08167e-17	0.30848	0.404784	0.244231
	-0.0186695	0.12325	0.166835	0.0279804	0.326945		0.179988	0.263706	0.30848	0.404784	0.244231
	0.107476	0.106247	0.166835	0.0279804	0.326945		-0.0202697	0.245641	0.359581	0.054497	0.329056
	-0.00605497	0.12325	0.166835	0.0279804	0.326945		0.0208804	0.198627	0.190366	0.404784	0.244231
	0.0444031	0.12325	0.166835	0.0279804	0.326945		0.19507	0.263706	0.30848	0.404784	0.244231
	0.0696321	0.12325	0.166835	0.0279804	0.326945		0.0995729	0.263706	0.30848	0.404784	0.244231
	0.00655955	0.12325	0.166835	0.0279804	0.326945		0.144168	0.263706	0.30848	0.404784	0.244231
	0.0696321	0.12325	0.166835	0.0279804	0.326945		-0.0718702	0.263706	0.30848	0.404784	0.244231
	0.170548	0.12325	0.166835	0.0279804	0.326945		0.0339143	0.204504	0.30848	0.404784	0.244231
	-0.00605497	0.12325	0.166835	0.0279804	0.326945		0.00510001	0.059511	0.212098	0.404784	0.244231
	-0.031284	0.12325	0.166835	0.0279804	0.326945		0.0306327	0.245641	0.359581	0.054497	0.329056
	-0.031284	0.12325	0.166835	0.0279804	0.326945		-0.0555177	0.263706	0.30848	0.217342	0.327089
	0.107476	0.12325	0.166835	0.0279804	0.326945		-0.00928398	0.245641	0.359581	0.054497	0.329056
	-0.00605497	0.12325	0.166835	0.0279804	0.326945		0.0899836	0.263706	0.30848	0.404784	0.244231
	-0.031284	0.145598	0.166835	0.0279804	0.326945		0.0306327	0.219175	0.212098	0.404784	0.244231
	0.0444031	0.12325	0.166835	0.0279804	0.326945		0.0344032	0.263706	0.30848	0.404784	0.244231
	-0.0206876	0.12325	0.166835	0.271669	0.326945		0.0419681	0.219175	0.212098	0.404784	0.22839
	-0.00882094	0.236072	0.418833	0.297989	0.244244		0.030759	0.227001	0.222668	0.404784	0.22839
	0.0151234	0.234074	0.309379	0.264463	0.326945		-0.0155728	0.219175	0.212098	0.404784	0.22839
	0.123316	0.271996	0.308455	0.271669	0.244244		-0.0175469	0.165555	0.212098	0.494429	0.22839
	-0.0230437	0.263686	0.308455	0.271669	0.244244		0.0109293	0.129644	0.212098	0.404784	0.22839
	0.0959699	0.263686	0.308455	0.271669	0.244244		0.0491384	0.0263081	-4.85723e-17	0.0279761	0.327089
	0.0576067	0.263686	0.308455	0.271669	0.244244		0.00655866	0.123233	0.166811	0.0279761	0.327089
	-0.00208902	0.104723	0.308455	0.271669	0.244244		0.0443971	0.123233	0.166811	0.0279761	0.327089
	-0.00892566	0.104723	0.0941621	0.271669	0.244244		0.0443971	0.123233	0.166811	0.0279761	0.327089
	0.124962	0.263686	0.308455	0.271669	0.244244		-0.0398805	0.123233	0.166811	0.0279761	0.327089
	-0.0194975	0.104723	0.308455	0.271669	0.244244		0.138157	0.123233	0.166811	0.0279761	0.327089
	-0.00892566	0.00174626	0.308455	0.271669	0.244244		-0.00605415	0.123233	0.166811	0.0279761	0.327089
	0.189026	0.209856	0.270398	0.271669	0.244244		0.00655866	0.123233	0.166811	0.0279761	0.327089
	-0.0574825	0.241814	0.308455	0.119959	0.244244		0.0696227	0.123233	0.166811	0.0279761	0.327089
	-0.022599	-4.16334e-17	0.308455	0.271669	0.244244		-0.018667	0.123233	0.166811	0.0279761	0.327089
	-0.0663425	0.280874	0.324032	0.119959	0.244244		0.0822355	0.123233	0.166811	0.0279761	0.327089
	0.0169646	0.263686	0.308455	0.271669	0.244244		0.0317843	0.123233	0.166811	0.0279761	0.327089
	0.0393756	0.229386	0.308455	0.271669	0.244244		0.0696227	0.106231	0.166811	0.0279761	0.327089
	-0.0557707	0.284424	0.306637	0.20831	0.317789		-0.018667	0.123233	0.166811	0.0279761	0.327089
	0.0576067	0.264895	0.308455	0.271669	0.244244		0.0443971	0.123233	0.166811	0.0279761	0.327089
	-0.0284241	0.263686	0.308455	0.271669	0.244244		-0.018667	0.0473907	0.0941185	0.271537	0.327089
	0.0169646	-4.16334e-17	0.234158	0.271669	0.244244		0.107461	0.123233	0.166811	0.0279761	0.327089
	0.0702685	0.209856	0.270398	0.271669	0.244244		-0.018667	0.123233	0.166811	0.0279761	0.327089
	0.0302601	0.241814	0.308455	0.271669	0.244244		0.0696227	0.123233	0.166811	0.0279761	0.327089
	0.0136743	0.263686	0.308455	0.271669	0.244244		-0.0565054	0.0540008	0.166811	0.0279761	0.327089
	-0.0389959	0.263686	0.308455	0.271669	0.244244		0.0443971	0.123233	0.166811	0.0279761	0.327089
	0.0298153	0.0474119	0.234158	0.271669	0.244244		0.00655866	0.123233	0.166811	0.0279761	0.327089
	-0.018486	0.263686	0.308455	0.271669	0.244244		-0.018667	0.0540008	0.166811	0.271537	0.327089
	0.0192435	0.241814	0.308455	0.271669	0.244244		0.10255	0.123233	0.166811	0.0279761	0.327089
	0.10901	0.263686	0.308455	0.271669	0.244244		0.10255	0.123233	0.166811	0.0279761	0.327089
	0.0190546	0.256017	0.324032	0.271669	0.244244		0.0443971	0.123233	0.166811	0.0279761	0.327089
	-0.0389959	0.263686	0.308455	0.271669	0.244244		0.0443971	0.0540008	0.166811	0.0279761	0.327089
	-0.00126642	0.104723	0.0941621	0.271669	0.244244		0.132687	0.0767227	0.166811	0.0279761	0.327089
	-0.0640636	0.264895	0.308455	0.271669	0.244244		0.0822355	0.123233	0.166811	0.0279761	0.327089
	-0.0534918	0.256017	0.324032	0.271669	0.244244		0.0317843	0.123233	0.166811	0.0279761	0.327089
	0.184468	0.256017	0.324032	0.271669	0.244244		-0.0312798	0.106231	0.166811	0.0279761	0.327089
	0.16168	0.263686	0.308455	0.271669	0.244244		0.00655866	0.123233	0.166811	0.0279761	0.327089
	-0.028613	0.263686	0.308455	0.271669	0.244244		-0.0312798	0.123233	0.166811	0.0279761	0.327089
	0.000823553	0.263686	0.308455	0.271669	0.244244		-0.018667	0.0767227	0.166811	0.0279761	0.327089
	0.0296264	0.284424	0.306637	0.20831	0.317789		-0.018667	0.0767227	0.166811	0.0279761	0.327089
	-0.0253226	0.229386	0.308455	0.271669	0.244244		0.0822355	0.123233	0.166811	0.0279761	0.327089
	0.179911	0.263686	0.308455	0.271669	0.244244		0.0313347	0.123233	0.166811	0.0279761	0.327089
	0.00329135	0.284424	0.306637	0.20831	0.317789		0.0191715	0.123233	0.166811	0.0279761	0.327089
	-0.00892566	-4.16334e-17	-7.63278e-17	-4.16334e-17	0.244244		0.0822355	0.123233	0.166811	0.119969	0.327089
	-0.00126642	0.115253	0.308455	0.271669	0.244244		0.0696227	0.123233	0.166811	0.0279761	0.327089
	0.0273475	0.263686	0.308455	0.271669	0.244244		0.00655866	0.0540008	0.166811	0.0279761	0.327089
	0.0192435	0.0682524	0.308455	0.271669	0.244244		0.0317843	0.123233	0.166811	0.0279761	0.327089
	0.099894	0.263686	0.308455	0.271669	0.244244		0.0443971	0.125904	0.166811	0.0279761	0.327089
	0.0068376	0.263686	0.308455	0.271669	0.244244		0.0443971	0.123233	0.166811	0.0279761	0.327089
	0.0862207	0.263686	0.308455	0.271669	0.244244		0.0441584	0.123233	0.166811	0.0279761	0.327089
	0.0930573	0.263686	0.308455	0.271669	0.244244		-0.00605415	0.123233	0.166811	0.0279761	0.327089
	0.0243789	0.104723	0.0941621	0.271669	0.244244		-0.00605415	0.123233	0.166811	0.0279761	0.327089
	0.00702652	0.104723	0.0941621	0.271669	0.244244		-0.00605415	0.123233	0.166811	0.0279761	0.327089
	0.038742	0.263686	0.308455	0.271669	0.244244		-0.0312798	0.125904	0.166811	0.0279761	0.327089
	0.000823553	0.263686	0.308455	0.271669	0.244244		-0.018667	0.123233	0.166811	0.0279761	0.327089
	-0.0253226	0.229386	0.308455	0.271669	0.244244		-0.018667	0.123233	0.166811	0.0279761	0.327089
	-0.0422863	0.104723	0.308455	0.271669	0.244244		0.132687	0.0767227	0.166811	0.0279761	0.327089
	0.0982488	0.263686	0.308455	0.271669	0.244244		0.0191715	0.123233	0.166811	0.0279761	0.327089
	0.0298153	0.0943029	0.0941621	0.271669	0.244244		0.0822355	0.123233	0.166811	0.0279761	0.327089
	0.0076602	0.263686	0.308455	0.271669	0.244244		0.10255	0.123233	0.166811	0.0279761	0.327089
	-0.00582418	0.263686	0.308455	0.271669	0.244244		0.0570099	0.123233	0.166811	0.0279761	0.327089
	0.0093054	0.104723	0.308455	0.271669	0.244244		-0.00605415	0.123233	0.166811	0.0279761	0.327089
	0.000189867	0.0682524	0.0941621	0.271669	0.244244		0.0443971	0.123233	0.166811	0.0279761	0.327089
	0.143826	0.263686	0.308455	0.271669	0.244244		0.0135309	0.0540008	0.117452	0.0279761	0.327089
	0.16168	0.263686	0.308455	0.271669	0.244244		0.0191715	0.123233	0.166811	0.0279761	0.327089
	-0.0180412	0.104723	0.308455	0.271669	0.244244		0.120074	0.123233	0.166811	0.0279761	0.327089
	-0.0458326	0.263686	0.308455	0.271669	0.244244		0.132687	0.0767227	0.166811	0.0279761	0.327089
	0.0238013	0.263686	0.308455	0.271669	0.244244		0.0173094	0.219175	0.212098	0.404784	0.22839
	0.0190546	0.256017	0.324032	0.271669	0.244244		0.0347879	0.156991	0.186497	0.404784	0.22839
	0.129519	0.256017	0.324032	0.271669	0.244244		-0.0125935	0.150447	0.186497	0.404784	0.22839
	0.186747	0.231161	0.234158	0.271669	0.244244		0.176781	0.162969	0.212098	0.404784	0.22839
	-0.00582418	0.209856	0.270398	0.271669	0.244244		0.0450921	0.267018	0.309321	0.264411	0.185763
	0.177632	0.263686	0.308455	0.271669	0.244244		0.00749974	0.127095	0.309321	0.264411	0.185763
	0.0298153	0.104723	0.308455	0.271669	0.244244		-0.0220056	0.171621	0.309321	0.264411	0.185763
	0.0192435	0.0943029	0.308455	0.271669	0.244244		-0.00481373	0.234031	0.309321	0.264411	0.185763
	-0.028613	0.229386	0.308455	0.271669	0.244244		0.126991	0.234031	0.309321	0.264411	0.185763
	-0.0240552	0.104723	0.308455	0.271669	0.244244		0.0353007	0.234031	0.309321	0.264411	0.185763
	-0.0240552	0.104723	0.308455	0.271669	0.244244		0.0696844	0.234031	0.309321	0.264411	0.185763
	0.0615308	0.216957	0.308455	0.271669	0.244244		-0.0105444	0.145955	0.309321	0.264411	0.185763
	0.0238013	0.104723	0.0941621	0.271669	0.244244		0.0238394	0.234031	0.309321	0.264411	0.185763
	0.123316	0.209856	0.270398	0.271669	0.244244		-0.0105444	0.145955	0.309321	0.264411	0.185763
	-0.0626073	0.216957	0.308455	0.271669	0.244244		0.02957	0.234031	0.309321	0.264411	0.185763
	-0.0203201	-4.16334e-17	0.324032	0.271669	0.244244		0.0238394	0.234031	0.309321	0.264411	0.185763
	-0.0410705	0.104723	0.0941621	0.271669	0.244244		0.0353007	0.234031	0.309321	0.264411	0.185763
	-0.0709003	0.231161	0.234158	0.271669	0.244244		-0.0277362	0.234031	0.309321	0.264411	0.185763
	-0.0180412	-4.16334e-17	0.308455	0.271669	0.244244		0.0467619	0.234031	0.309321	0.264411	0.185763
	-0.00126642	0.263686	0.308455	0.271669	0.244244		0.00664753	0.234031	0.309321	0.264411	0.185763
	0.0530489	0.263686	0.308455	0.271669	0.244244		0.0811457	0.234031	0.309321	0.264411	0.185763
	0.0192435	0.104723	0.308455	0.271669	0.244244		0.0238394	0.234031	0.309321	0.264411	0.185763
	0.0439334	0.263686	0.308455	0.271669	0.244244		-0.0334669	0.234031	0.309321	0.264411	0.185763
	0.124962	0.263686	0.308455	0.271669	0.244244		0.0353007	0.234031	0.309321	0.264411	0.185763
	0.16168	0.263686	0.308455	0.271669	0.244244		0.0238394	0.234031	0.309321	0.264411	0.185763
	-0.0354497	0.115253	0.308455	0.271669	0.244244		-0.00481373	0.234031	0.309321	0.264411	0.185763
	0.00329135	0.263686	0.308455	0.271669	0.244244		0.0639538	0.234031	0.309321	0.264411	0.185763
	0.0298153	0.0943029	0.308455	0.271669	0.244244		-0.06212	0.145955	0.309321	0.264411	0.185763
	0.00310244	0.263686	0.308455	0.271669	0.244244		-0.0334669	0.171621	0.309321	0.264411	0.185763
	-0.022599	0.104723	0.0941621	0.271669	0.244244		0.0868763	0.234031	0.309321	0.264411	0.185763
	-0.0253226	0.216957	0.308455	0.271669	0.244244		0.0868763	0.234031	0.309321	0.264411	0.185763
	0.0093054	0.104723	0.308455	0.271669	0.244244		0.075415	0.234031	0.309321	0.264411	0.185763
	0.124962	0.264895	0.308455	0.271669	0.244244		-0.0735812	0.171621	0.309321	0.264411	0.185763
	-0.0103819	0.115253	0.308455	0.271669	0.244244		0.00664753	0.234031	0.309321	0.264411	0.185763
	-0.0230437	0.263686	0.308455	0.271669	0.244244		-0.0220056	0.234031	0.309321	0.264411	0.185763
	0.0213335	0.264895	0.308455	0.271669	0.244244		0.184297	0.234031	0.309321	0.264411	0.185763
	0.0298153	0.0474119	0.0941621	0.271669	0.244244		-0.0449281	0.104582	0.309321	0.264411	0.185763
	-0.018486	0.263686	0.308455	0.271669	0.244244		-0.0449281	0.234031	0.309321	0.264411	0.185763
	0.00329135	0.115253	0.308455	0.271669	0.244244		0.0353007	0.234031	0.309321	0.264411	0.185763
	0.0343731	0.104723	0.0941621	0.271669	0.244244		0.0811457	0.234031	0.309321	0.264411	0.185763
	0.0169646	-4.16334e-17	0.234158	0.271669	0.244244		0.0123782	0.234031	0.309321	0.264411	0.185763
	0.038742	0.263686	0.308455	0.271669	0.244244		-0.0449281	0.234031	0.309321	0.264411	0.185763
	-0.0194975	0.264895	0.308455	0.271669	0.244244		0.126991	0.234031	0.309321	0.264411	0.185763
	0.0702685	0.241814	0.308455	0.271669	0.244244		0.0238394	0.234031	0.309321	0.264411	0.185763
	0.0350068	0.263686	0.308455	0.271669	0.244244		-0.0220056	0.171621	0.309321	0.264411	0.185763
	-0.00582418	0.115253	0.308455	0.271669	0.244244		-0.0105444	0.145955	0.309321	0.264411	0.185763
	-0.00145533	0.229386	0.308455	0.271669	0.244244		-0.00481373	0.104582	0.309321	0.264411	0.185763
	0.0298153	0.0474119	0.0941621	0.271669	0.244244		0.0926069	0.234031	0.309321	0.264411	0.185763
	0.0816629	0.263686	0.308455	0.271669	0.244244		-0.0277362	0.234031	0.309321	0.264411	0.185763
	0.16168	0.263686	0.308455	0.271669	0.244244		0.0353007	0.234031	0.309321	0.264411	0.185763
	0.0350068	0.271996	0.308455	0.271669	0.244244		0.0467619	0.234031	0.309321	0.264411	0.185763
	0.0388571	0.219044	0.211969	0.404528	0.22838		-0.0449281	0.104582	0.309321	0.264411	0.185763
	0.0678812	0.105539	0.14161	0.323779	0.22838		0.126991	0.234031	0.309321	0.264411	0.185763
	-0.0101752	0.0399432	0.0841351	0.0959748	-0.0957949		0.0353007	0.234031	0.309321	0.264411	0.185763
	0.00651287	0.219044	0.211969	0.404528	0.22838		0.0582232	0.234031	0.309321	0.264411	0.185763
	0.039895	0.184358	0.211969	0.404528	0.22838		-0.0289583	0.234191	0.309321	0.271537	0.225823
	0.0461283	0.184358	0.211969	0.404528	0.22838		-0.0277362	0.234031	0.309321	0.264411	0.185763
	0.133588	0.21942	0.277171	0.345368	0.225752		-0.0563894	0.234031	0.309321	0.264411	0.185763
	0.0631021	0.0736847	0.210349	0.404528	0.22838		0.0238394	0.234031	0.309321	0.264411	0.185763
	-0.0374949	0.0835976	0.132416	0.404528	0.22838		0.0983375	0.234031	0.309321	0.264411	0.185763
	-0.0764102	0.219044	0.211969	0.404528	0.22838		-0.06212	0.234031	0.309321	0.264411	0.185763
	-0.032264	0.219044	0.211969	0.404528	0.22838		-0.0678506	0.140336	0.309321	0.264411	0.185763
	0.0906775	0.219044	0.211969	0.404528	0.22838		0.0410313	0.234031	0.309321	0.264411	0.185763
	0.047958	0.159789	0.0609372	0.150301	0.338246		0.0582232	0.234031	0.309321	0.264411	0.185763
	0.00627842	0.219044	0.211969	0.404528	0.22838		0.126991	0.234031	0.309321	0.264411	0.185763
	-0.00128664	0.136405	0.211969	0.404528	0.22838		0.0467619	0.234031	0.309321	0.264411	0.185763
	-0.0676473	0.219044	0.211969	0.404528	0.22838		0.115529	0.234031	0.309321	0.264411	0.185763
	-0.0265191	0.148474	0.211969	0.404528	0.22838		-0.0277362	0.234031	0.309321	0.264411	0.185763
	0.102927	0.137714	0.211969	0.404528	0.22838		0.0123782	0.234031	0.309321	0.264411	0.185763
	0.0677729	0.168272	0.211969	0.404528	0.22838		0.00664753	0.234031	0.309321	0.264411	0.185763
	0.109263	0.148474	0.18647	0.404528	0.22838		0.0582232	0.234031	0.309321	0.264411	0.185763
	0.0182566	0.104723	0.211969	0.404528	0.22838		0.0353007	0.234031	0.309321	0.264411	0.185763
	-0.0257884	0.181524	0.211969	0.404528	0.22838		0.0467619	0.234031	0.309321	0.264411	0.185763
	0.114895	0.219044	0.211969	0.404528	0.22838		0.0410313	0.234031	0.309321	0.264411	0.185763
	0.06345	0.219044	0.211969	0.404528	0.22838		0.0524925	0.234031	0.309321	0.264411	0.185763
	-0.0264574	0.104723	0.261663	0.404528	0.22838		0.0524925	0.234031	0.309321	0.264411	0.185763
	-0.00878567	0.148474	0.18647	0.150301	0.338246		-0.0277362	0.0375421	0.309321	0.264411	0.185763
	0.0708873	0.219044	0.211969	0.404528	0.22838		0.00664753	0.234031	0.309321	0.264411	0.185763
	0.00303625	0.104723	0.211969	0.404528	0.22838		0.0868763	0.234031	0.309321	0.264411	0.185763
	0.104072	0.21942	0.277171	0.345368	0.225752		0.0868763	0.234031	0.309321	0.264411	0.185763
	-0.0227299	0.168272	0.211969	0.404528	0.22838		0.0410313	0.234031	0.309321	0.264411	0.185763
	0.0530653	0.148474	0.211969	0.404528	0.22838		-0.0277362	0.234031	0.309321	0.264411	0.185763
	-0.0352224	0.219044	0.211969	0.404528	0.22838		0.0811457	0.234031	0.309321	0.264411	0.185763
	0.00069172	0.191222	0.226487	0.404528	0.22838		0.0467619	0.234031	0.309321	0.264411	0.185763
	0.0512887	0.219044	0.211969	0.404528	0.22838		-0.0277362	0.234031	0.309321	0.264411	0.185763
	0.0292754	0.219044	0.211969	0.404528	0.22838		-0.0277362	0.234031	0.309321	0.264411	0.185763
	0.0177139	0.138725	0.166835	0.0959748	0.326945		0.0582232	0.234031	0.309321	0.264411	0.185763
	0.04561	0.127426	0.166835	0.0959748	0.326945		-0.0220056	0.234031	0.309321	0.264411	0.185763
	0.0191702	0.09764	0.145401	0.271669	0.225752		0.02957	0.234031	0.309321	0.264411	0.185763
	-0.048415	0.138725	0.0889269	0.264463	0.185654		-0.0129384	0.109051	0.309321	0.264411	0.185763
	0.0886715	0.234074	0.309379	0.264463	0.185654		0.0410313	0.234031	0.309321	0.264411	0.185763
	0.100359	0.234074	0.309379	0.264463	0.185654		0.00664753	0.234031	0.309321	0.264411	0.185763
	-0.00212974	0.113845	0.309379	0.264463	0.185654		0.0983375	0.234031	0.309321	0.264411	0.185763
	-0.00549385	0.234074	0.309379	0.264463	0.185654		0.0238394	0.234031	0.309321	0.264411	0.185763
	0.0524786	0.135716	0.145401	0.237822	0.0335807		-0.0277362	0.0075494	0.20397	0.264411	0.185763
	0.0814742	0.234074	0.309379	0.264463	0.185654		0.0410313	0.234031	0.309321	0.264411	0.185763
	-0.0489999	0.136041	0.211459	0.297989	0.225752		-0.0735812	0.171621	0.309321	0.264411	0.185763
	0.0515425	0.104723	0.0941621	0.297989	0.225752		-0.0277362	0.234031	0.309321	0.264411	0.185763
	0.0739357	0.184358	0.211459	0.297989	0.225752		0.0983375	0.234031	0.309321	0.264411	0.185763
	0.11077	0.184358	0.211459	0.297989	0.225752		0.0696844	0.234031	0.309321	0.264411	0.185763
	-0.0290134	0.0240333	0.211459	0.297989	0.225752		-0.0105444	0.234031	0.309321	0.264411	0.185763
	-0.0264846	0.149834	0.211459	0.297989	0.225752		0.184297	0.234031	0.309321	0.264411	0.185763
	-0.0391287	0.151805	0.173329	0.297989	0.225752		0.0181088	0.234031	0.309321	0.264411	0.185763
	0.0333527	0.108939	0.211459	0.297989	0.225752		-0.0277362	0.0375421	0.309321	0.264411	0.185763
	-0.021427	0.184358	0.211459	0.297989	0.225752		-0.016275	0.140336	0.309321	0.264411	0.185763
	-0.0664575	0.184358	0.211459	0.297989	0.225752		0.0696844	0.234031	0.309321	0.264411	0.185763
	-0.0365999	0.21092	0.143607	0.297989	0.225752		0.0009169	0.234031	0.309321	0.264411	0.185763
	0.0310679	0.189244	0.211459	0.297989	0.225752		0.0238394	0.234031	0.309321	0.264411	0.185763
	0.0481595	0.163628	0.211459	0.297989	0.225752		-0.0965037	0.100112	0.309321	0.264411	0.185763
	-0.0166134	0.149834	0.211459	0.297989	0.225752		-0.00481373	0.234031	0.309321	0.264411	0.185763
	0.0664713	0.184358	0.211459	0.297989	0.225752		0.0123782	0.234031	0.309321	0.264411	0.185763
	0.0987358	0.184358	0.211459	0.297989	0.225752		-0.0449281	0.234031	0.309321	0.264411	0.185763
	0.00157638	0.189244	0.211459	0.297989	0.225752		0.0696844	0.234031	0.309321	0.264411	0.185763
	0.0511764	0.149834	0.211459	0.297989	0.225752		-0.0563894	0.0822351	0.309321	0.264411	0.185763
	-0.0915016	0.21092	0.143607	0.297989	0.225752		0.0181088	0.234031	0.309321	0.264411	0.185763
	0.138587	0.184358	0.211459	0.297989	0.225752		-0.0220056	0.171621	0.309321	0.264411	0.185763
	0.01879	0.184358	0.211459	0.297989	0.225752		0.0410313	0.234031	0.309321	0.264411	0.185763
	-0.00902698	0.21092	0.143607	0.297989	0.225752		-0.0334669	0.234031	0.309321	0.264411	0.185763
	0.0284171	0.184358	0.211459	0.297989	0.225752		-0.0277362	0.0196649	0.309321	0.264411	0.185763
	0.0668056	0.184358	0.211459	0.297989	0.225752		0.0238394	0.234031	0.309321	0.264411	0.185763
	-0.0259965	0.0269284	0.173329	0.297989	0.225752		0.0868763	0.234031	0.309321	0.264411	0.185763
	-0.0664575	0.184358	0.211459	0.297989	0.225752		0.184297	0.234031	0.309321	0.264411	0.185763
	0.120885	0.184358	0.211459	0.297989	0.225752		0.0120452	0.234031	0.309321	0.264411	0.185763
	-0.0512846	0.104723	0.211459	0.297989	0.225752		-0.0391975	0.234031	0.309321	0.264411	0.185763
	0.0211967	0.104723	0.0941621	0.297989	0.225752		-0.0563894	0.100112	0.309321	0.264411	0.185763
	0.0734476	0.184358	0.211459	0.297989	0.225752		-0.0563894	0.234031	0.309321	0.264411	0.185763
	-0.0489999	0.104723	0.0941621	0.271669	0.225752		-0.0129384	0.109051	0.309321	0.264411	0.185763
	-0.0479151	0.184358	0.211459	0.297989	0.22838		0.00664753	0.234031	0.309321	0.264411	0.185763
	-0.0689863	0.0754193	0.211459	0.297989	0.225752		-0.0220056	0.171621	0.309321	0.264411	0.185763
	0.0615357	0.184358	0.211459	0.297989	0.225752		0.12126	0.234031	0.309321	0.264411	0.185763
	0.0112035	0.184358	0.211459	0.297989	0.225752		0.075415	0.234031	0.309321	0.264411	0.185763
	-0.0391287	0.163628	0.211459	0.297989	0.225752		-0.0220056	0.234031	0.309321	0.264411	0.185763
	-0.0234677	0.104723	0.211459	0.297989	0.225752		0.0696844	0.234031	0.309321	0.264411	0.185763
	0.0408171	0.184358	0.211459	0.297989	0.225752		-0.0563894	0.100112	0.309321	0.264411	0.185763
	0.0686341	0.189244	0.211459	0.297989	0.225752		0.0238394	0.234031	0.309321	0.264411	0.185763
	-0.0390067	0.104723	0.211459	0.297989	0.225752		0.0410313	0.234031	0.309321	0.264411	0.185763
	0.0444714	0.104723	0.0941621	0.271669	0.225752		-0.0793119	0.171621	0.309321	0.264411	0.185763
	-0.0391287	-4.16334e-17	0.211459	0.297989	0.225752		0.0123782	0.234031	0.309321	0.264411	0.185763
	-0.0259965	0.128159	0.211459	0.297989	0.225752		0.00664753	0.234031	0.309321	0.264411	0.185763
	0.0586408	0.104723	0.211459	0.297989	0.225752		0.0353007	0.234031	0.309321	0.264411	0.185763
	0.0112035	0.197126	0.232874	0.297989	0.225752		0.115529	0.234031	0.309321	0.264411	0.185763
	-0.0689863	0.0754193	0.211459	0.297989	0.225752		0.0339397	0.234031	0.309321	0.264411	0.185763
	0.0633324	0.184358	0.211459	0.297989	0.225752		-0.0277362	0.234031	0.309321	0.264411	0.185763
	0.0042864	0.0943029	0.0941621	0.271669	0.225752		0.00664753	0.234031	0.309321	0.264411	0.185763
	-0.0434541	0.184358	0.211459	0.297989	0.225752		0.0467619	0.234031	0.309321	0.264411	0.185763
	0.0509324	0.184358	0.211459	0.297989	0.225752		-0.0277362	0.234191	0.309321	0.264411	0.185763
	0.096451	0.136041	0.211459	0.297989	0.225752		0.0009169	0.234031	0.309321	0.264411	0.185763
	0.0308239	0.108939	0.211459	0.297989	0.225752		-0.0105444	0.234031	0.309321	0.264411	0.185763
	0.0333527	0.139413	0.211459	0.297989	0.225752		0.0238394	0.234031	0.309321	0.271537	0.225823
	0.0515425	0.104723	0.0941621	0.297989	0.225752		0.0868763	0.234031	0.309321	0.264411	0.185763
	0.0864578	0.104723	0.211459	0.297989	0.225752		-0.0105444	0.234031	0.309321	0.264411	0.185763
	0.0452554	0.184358	0.211459	0.297989	0.225752		0.0811457	0.234031	0.309321	0.264411	0.185763
	0.0411832	0.136041	0.211459	0.297989	0.225752		0.109799	0.234031	0.309321	0.264411	0.185763
	0.0464849	0.104723	0.0941621	0.297989	0.225752		-0.0735812	0.100112	0.309321	0.264411	0.185763
	0.0709188	0.149834	0.211459	0.297989	0.225752		-0.016275	0.0420114	0.309321	0.264411	0.185763
	-0.0166134	0.184358	0.211459	0.297989	0.225752		0.0582232	0.234031	0.309321	0.264411	0.185763
	0.00108827	0.184358	0.211459	0.297989	0.225752		-0.00481373	0.234031	0.309321	0.264411	0.185763
	0.0364917	0.184358	0.211459	0.297989	0.225752		0.0582232	0.234031	0.309321	0.264411	0.185763
	-0.0184101	0.104723	0.211459	0.297989	0.225752		-0.0220056	0.0075494	0.309321	0.264411	0.185763
	0.0586408	0.104723	0.211459	0.297989	0.225752		0.0524925	0.234031	0.309321	0.264411	0.185763
	0.0936781	0.128159	0.211459	0.297989	0.225752		0.0009169	0.234031	0.309321	0.264411	0.185763
	-0.0264846	0.149834	0.211459	0.297989	0.225752		0.0123782	0.234031	0.309321	0.264411	0.185763
	0.0686341	0.151805	0.173329	0.297989	0.225752		0.0467619	0.234031	0.309321	0.264411	0.185763
	0.0987358	0.184358	0.211459	0.297989	0.225752		-0.0391975	0.234031	0.309321	0.264411	0.185763
	0.0664713	0.184358	0.211459	0.297989	0.225752		-0.0449281	0.234031	0.309321	0.264411	0.185763
	-0.00601006	-4.16334e-17	-7.63278e-17	0.297989	0.225752		0.0639538	0.234031	0.309321	0.264411	0.185763
	-0.0290134	0.0240333	0.211459	0.297989	0.225752		0.0696844	0.234031	0.309321	0.264411	0.185763
	-0.0290134	0.128159	0.211459	0.297989	0.225752		-0.0220056	0.234031	0.309321	0.264411	0.244231
	0.0633324	0.184358	0.211459	0.297989	0.225752		-0.0449281	0.104582	0.309321	0.264411	0.185763
	0.101509	0.163628	0.211459	0.297989	0.225752		-0.0220056	0.171621	0.309321	0.264411	0.185763
	-0.0113117	0.184358	0.211459	0.297989	0.225752		0.0410313	0.234031	0.309321	0.264411	0.185763
	-0.0264846	0.184358	0.211459	0.297989	0.225752		0.184297	0.234031	0.309321	0.264411	0.185763
	0.0139764	0.184358	0.211459	0.297989	0.225752		0.0582232	0.234031	0.309321	0.264411	0.185763
	0.0739357	0.184358	0.211459	0.297989	0.225752		-0.0220056	0.171621	0.309321	0.264411	0.185763
	0.0739357	0.184358	0.211459	0.297989	0.225752		0.0467619	0.234031	0.309321	0.264411	0.185763
	0.0537052	0.163628	0.211459	0.297989	0.225752		0.0582232	0.234031	0.309321	0.264411	0.185763
	-0.0290134	0.0240333	0.211459	0.297989	0.225752		-0.0563894	0.100112	0.309321	0.264411	0.185763
	0.0484036	0.184358	0.211459	0.297989	0.225752		-0.0391975	0.234031	0.309321	0.264411	0.185763
	0.141115	0.21092	0.143607	0.297989	0.225752		-0.0220056	0.234031	0.309321	0.264411	0.185763
	-0.00902698	0.21092	0.143607	0.297989	0.225752		-0.0449281	0.0075494	0.309321	0.264411	0.185763
	0.0109595	0.104723	0.17268	0.297989	0.225752		-0.0850425	0.145955	0.309321	0.264411	0.185763
	-0.0113117	0.184358	0.211459	0.297989	0.225752		0.075415	0.234031	0.309321	0.264411	0.185763
	-0.0489999	0.136041	0.211459	0.297989	0.225752		0.0353007	0.234031	0.309321	0.264411	0.185763
	0.0408171	0.184358	0.211459	0.297989	0.225752		0.0524925	0.234031	0.309321	0.264411	0.185763
	0.0337188	0.108939	0.211459	0.297989	0.225752		-0.00481373	0.234031	0.309321	0.264411	0.185763
	-0.00119649	0.104723	0.211459	0.297989	0.225752		0.0524925	0.234031	0.309321	0.264411	0.185763
	0.0433459	0.184358	0.211459	0.297989	0.225752		0.12126	0.234031	0.309321	0.264411	0.185763
	0.0308239	0.184358	0.211459	0.297989	0.225752		-0.0220056	0.171621	0.309321	0.264411	0.185763
	-0.0166134	0.149834	0.211459	0.297989	0.225752		0.0123782	0.234031	0.309321	0.264411	0.185763
	0.00651198	0.104723	0.211459	0.297989	0.225752		-0.102234	0.104582	0.309321	0.264411	0.185763
	0.00157638	0.189244	0.211459	0.297989	0.225752		0.109799	0.234031	0.309321	0.264411	0.185763
	0.043468	0.184358	0.211459	0.297989	0.225752		-0.0334669	0.234031	0.309321	0.264411	0.185763
	-0.00119649	0.104723	0.211459	0.297989	0.225752		0.126991	0.234031	0.309321	0.264411	0.185763
	0.0344803	0.184358	0.211459	0.297989	0.225752		0.126991	0.234031	0.309321	0.264411	0.185763
	0.0209527	0.184358	0.211459	0.297989	0.225752		0.0238394	0.234031	0.309321	0.264411	0.185763
	0.0186679	0.104723	0.0941621	0.297989	0.225752		0.0181088	0.234031	0.309321	0.264411	0.185763
	0.0344803	0.184358	0.211459	0.297989	0.225752		-0.0735812	0.140336	0.309321	0.264411	0.185763
	-0.0113117	0.184358	0.211459	0.297989	0.225752		0.0009169	0.234031	0.309321	0.264411	0.185763
	0.0115696	0.104723	0.211459	0.297989	0.225752		0.0467619	0.234031	0.309321	0.264411	0.185763
	0.0409391	0.184358	0.211459	0.297989	0.225752		0.02957	0.234031	0.309321	0.264411	0.185763
	-0.0234677	0.104723	0.211459	0.297989	0.225752		0.0123782	0.234031	0.309321	0.264411	0.185763
	0.0287832	0.104723	0.0941621	0.297989	0.225752		0.0410313	0.234031	0.309321	0.264411	0.185763
	0.0215628	0.104723	0.211459	0.297989	0.225752		-0.00481373	0.234031	0.309321	0.264411	0.185763
	-0.0290134	0.189244	0.211459	0.297989	0.225752		-0.0449281	0.234031	0.309321	0.264411	0.185763
	-0.0217931	0.104723	0.0941621	0.297989	0.225752		0.0811457	0.234031	0.309321	0.264411	0.185763
	0.0333527	0.108939	0.211459	0.297989	0.225752		0.0410313	0.234031	0.309321	0.264411	0.185763
	-0.0415355	-4.16334e-17	0.211459	0.297989	0.225752		-0.0220056	0.234031	0.309321	0.264411	0.22839
	-0.0390067	0.104723	0.211459	0.297989	0.225752		0.0696844	0.234031	0.309321	0.264411	0.185763
	0.0537052	0.163628	0.211459	0.297989	0.225752		-0.0506587	0.140336	0.309321	0.264411	0.185763
	-0.0715151	0.0958961	0.211459	0.297989	0.225752		0.0582232	0.234031	0.309321	0.264411	0.185763
	0.0608036	0.184358	0.211459	0.297989	0.225752		0.0123782	0.234031	0.309321	0.264411	0.185763
	0.0810341	0.184358	0.211459	0.297989	0.225752		-0.0105444	0.234031	0.309321	0.264411	0.185763
	-0.0234677	0.184358	0.211459	0.297989	0.225752		0.0327995	0.234031	0.309321	0.271537	0.225823
	-0.0662135	0.189244	0.211459	0.297989	0.225752		-0.0793119	0.171621	0.309321	0.264411	0.185763
	0.0184239	0.184358	0.211459	0.297989	0.225752		0.0123782	0.234031	0.309321	0.264411	0.185763
	-0.0391287	0.184358	0.211459	0.297989	0.225752		0.0524925	0.234031	0.309321	0.264411	0.185763
	0.0234815	0.184358	0.211459	0.297989	0.225752		0.0009169	0.234031	0.309321	0.264411	0.185763
	0.0112035	0.184358	0.211459	0.297989	0.225752		0.0238394	0.234031	0.309321	0.264411	0.185763
	0.0464849	0.104723	0.0941621	0.297989	0.225752		0.0410313	0.234031	0.309321	0.264411	0.185763
	0.123414	0.149834	0.211459	0.297989	0.225752		-0.06212	0.234031	0.309321	0.264411	0.185763
	-0.0391287	0.163628	0.211459	0.297989	0.225752		-0.00481373	0.234031	0.309321	0.264411	0.185763
	-0.0290134	0.128159	0.211459	0.297989	0.225752		-0.00481373	0.234031	0.309321	0.264411	0.185763
	0.0615357	0.184358	0.211459	0.297989	0.225752		0.0868763	0.234031	0.309321	0.264411	0.185763
	0.166404	0.151805	0.173329	0.297989	0.225752		0.075415	0.234031	0.309321	0.264411	0.185763
	0.0139764	-4.16334e-17	0.143607	0.297989	0.225752		-0.0735812	0.100112	0.309321	0.264411	0.185763
	-0.0234677	0.0943029	0.211459	0.297989	0.225752		0.00664753	0.234191	0.309321	0.264411	0.185763
	-0.00601006	0.184358	0.211459	0.297989	0.225752		0.0696844	0.234031	0.309321	0.264411	0.185763
	-0.0434541	0.184358	0.211459	0.297989	0.225752		0.0639538	0.234031	0.309321	0.264411	0.185763
	-0.0188982	0.184358	0.211459	0.297989	0.225752		0.0868763	0.234031	0.309321	0.264411	0.185763
	0.0534612	0.184358	0.211459	0.297989	0.225752		-0.0105444	0.145955	0.309321	0.264411	0.185763
	-0.0113117	0.0682524	0.211459	0.297989	0.225752		-0.0105444	0.234031	0.309321	0.264411	0.185763
	0.128471	0.184358	0.211459	0.297989	0.225752		0.0181088	0.234031	0.309321	0.264411	0.185763
	-0.0166134	0.149834	0.211459	0.297989	0.225752		0.0811457	0.234031	0.309321	0.264411	0.185763
	0.0557459	0.136041	0.211459	0.297989	0.225752		0.02957	0.234031	0.309321	0.264411	0.185763
	0.0112035	0.197126	0.232874	0.297989	0.225752		0.104068	0.234031	0.309321	0.264411	0.185763
	0.0415493	0.184358	0.211459	0.297989	0.225752		-0.0220056	0.234031	0.309321	0.264411	0.185763
	-0.00662019	-4.16334e-17	0.0941621	0.297989	0.225752		-0.0277362	0.234031	0.309321	0.264411	0.185763
	0.0936781	0.128159	0.211459	0.297989	0.225752		0.104068	0.234031	0.309321	0.264411	0.185763
	0.0511764	0.149834	0.211459	0.297989	0.225752		0.075415	0.234031	0.309321	0.264411	0.185763
	0.138587	0.184358	0.211459	0.297989	0.225752		-0.0449281	0.140336	0.309321	0.264411	0.185763
	0.0734476	0.184358	0.211459	0.297989	0.225752		0.0123782	0.234031	0.309321	0.264411	0.185763
	-0.0514681	0.0615223	0.0941621	0.271669	0.225752		0.0811457	0.234031	0.309321	0.264411	0.185763
	0.0251716	0.0888461	0.0941621	0.271669	0.225752		0.0410313	0.234031	0.309321	0.264411	0.185763
	0.0472289	0.122893	0.0941621	0.271669	0.225752		0.0410313	0.234031	0.309321	0.264411	0.185763
	0.0861473	0.0914172	0.107991	0.271669	0.225752		0.0983375	0.234031	0.309321	0.264411	0.185763
	-0.024406	0.205909	0.282252	0.264463	0.244244		0.0868763	0.234031	0.309321	0.264411	0.185763
	0.106808	0.197868	0.211969	0.404528	0.22838		0.0181088	0.234031	0.309321	0.264411	0.185763
	0.0545658	0.0159858	0.0954055	0.271669	0.225752		0.0582232	0.234031	0.309321	0.264411	0.185763
	-0.000567489	0.234074	0.342297	0.264463	0.185654		0.0573788	0.234031	0.309321	0.264411	0.185763
	0.0164094	0.234074	0.309379	0.264463	0.185654		-0.0334669	0.234031	0.309321	0.264411	0.185763
	0.0848135	0.145981	0.309379	0.264463	0.185654		-0.0678506	0.234031	0.309321	0.264411	0.185763
	0.0164094	0.123303	0.309379	0.270958	0.185654		-0.0449281	0.104582	0.309321	0.264411	0.185763
	-0.00348691	0.234074	0.309379	0.264463	0.185654		-0.0334669	0.234031	0.309321	0.264411	0.185763
	0.00778607	0.234074	0.309379	0.264463	0.185654		0.0353007	0.234031	0.309321	0.264411	0.185763
	0.0306018	0.234074	0.309379	0.264463	0.185654		-0.0334669	0.0822351	0.309321	0.264411	0.185763
	0.0296143	0.263575	0.309379	0.264463	0.185654		0.0467619	0.234031	0.309321	0.264411	0.185763
	0.00513645	0.234074	0.309379	0.264463	0.185654		-0.0220056	0.234031	0.309321	0.264411	0.185763
	-0.0132216	0.165253	0.115998	0.264463	0.185654		-0.0735812	0.100112	0.309321	0.264411	0.185763
	0.098363	0.165253	0.115998	0.264463	0.185654		-0.06212	0.104582	0.309321	0.264411	0.185763
	0.0100423	0.234074	0.309379	0.264463	0.185654		0.0467619	0.234031	0.309321	0.264411	0.185763
	0.098363	0.173916	0.309379	0.264463	0.185654		0.0811457	0.234031	0.309321	0.264411	0.185763
	-0.00375198	0.234074	0.309379	0.264463	0.185654		0.0639538	0.234031	0.309321	0.264411	0.244231
	0.062125	0.234074	0.309379	0.264463	0.185654		-0.0793119	0.234031	0.309321	0.264411	0.185763
	-0.0210509	0.234074	0.309379	0.264463	0.185654		0.0524925	0.234031	0.309321	0.264411	0.185763
	0.0376309	0.234074	0.309379	0.264463	0.185654		-0.00481373	0.234031	0.309321	0.264411	0.185763
	-0.00375198	0.173916	0.309379	0.264463	0.185654		0.0410313	0.234031	0.309321	0.264411	0.185763
	0.019922	0.234074	0.309379	0.264463	0.185654		0.0238394	0.234031	0.309321	0.264411	0.185763
	0.117302	0.152403	0.309379	0.264463	0.185654		0.0639538	0.234031	0.309321	0.264411	0.185763
	0.00653773	0.234074	0.309379	0.264463	0.185654		-0.0334669	0.140336	0.309321	0.271537	0.225823
	0.0763294	0.234074	0.309379	0.264463	0.185654		0.104068	0.234031	0.309321	0.264411	0.185763
	0.0633552	0.0986211	0.233353	0.0959748	0.185654		0.0696844	0.234031	0.309321	0.264411	0.185763
	0.0518353	0.234074	0.309379	0.264463	0.185654		0.02957	0.234031	0.309321	0.264411	0.185763
	-0.081783	0.0803356	0.309379	0.264463	0.185654		-0.102234	0.104582	0.309321	0.264411	0.185763
	-0.058109	0.09764	0.115998	0.264463	0.185654		0.0524925	0.234031	0.309321	0.264411	0.185763
	0.0586204	0.234074	0.309379	0.264463	0.185654		-0.0334669	0.234031	0.309321	0.264411	0.185763
	0.0538856	0.216941	0.189377	0.264463	0.185654		-0.0506587	0.234031	0.309321	0.264411	0.185763
	0.103918	0.145981	0.309379	0.264463	0.185654		0.0009169	0.234031	0.309321	0.264411	0.185763
	-0.00848677	0.0803356	0.309379	0.264463	0.185654		0.0467619	0.234031	0.309321	0.264411	0.185763
	-0.0124014	0.09764	0.309379	0.264463	0.185654		-0.0563894	0.234191	0.309321	0.264411	0.185763
	0.100003	0.234074	0.309379	0.264463	0.185654		0.0410313	0.234031	0.309321	0.264411	0.185763
	0.00530753	0.0373101	0.277329	0.264463	0.185654		0.0696844	0.234031	0.309321	0.264411	0.185763
	0.103918	0.165253	0.233353	0.0959748	0.185654		0.0696844	0.234031	0.309321	0.264411	0.185763
	-0.0313406	0.234074	0.309379	0.264463	0.185654		-0.0678506	0.140336	0.309321	0.264411	0.185763
	0.0565701	0.09764	0.309379	0.264463	0.185654		0.0123782	0.234031	0.309321	0.264411	0.185763
	0.0755092	0.09764	0.115998	0.264463	0.185654		0.0467619	0.234031	0.309321	0.264411	0.185763
	0.160735	0.216941	0.189377	0.264463	0.185654		-0.0334669	0.234031	0.309321	0.264411	0.185763
	0.0977266	0.234074	0.309379	0.264463	0.185654		0.0410313	0.234031	0.309321	0.264411	0.185763
	0.160735	0.234074	0.309379	0.264463	0.185654		0.0582232	0.234031	0.309321	0.264411	0.185763
	0.105558	0.100714	0.309379	0.264463	0.185654		-0.0105444	0.234031	0.309321	0.264411	0.185763
	0.0604847	0.09764	0.309379	0.264463	0.185654		0.0353007	0.234031	0.309321	0.264411	0.185763
	0.0151872	0.09764	0.309379	0.264463	0.185654		0.00664753	0.234031	0.309321	0.264411	0.185763
	0.0538856	0.234074	0.309379	0.264463	0.185654		0.02957	0.234031	0.309321	0.264411	0.185763
	-0.0132216	0.234074	0.309379	0.264463	0.185654		-0.0105444	0.234031	0.309321	0.264411	0.185763
	0.0104524	0.145981	0.309379	0.264463	0.185654		-0.0277362	0.234031	0.309321	0.264411	0.185763
	0.0917639	0.234074	0.309379	0.264463	0.185654		-0.0277362	0.234031	0.309321	0.264411	0.185763
	0.0565701	0.09764	0.115998	0.264463	0.185654		-0.0105444	0.234031	0.309321	0.264411	0.185763
	-0.0270159	0.234074	0.309379	0.264463	0.185654		0.0639538	0.234031	0.309321	0.264411	0.185763
	-0.00848677	0.0194894	0.309379	0.264463	0.185654		-0.0220056	0.234031	0.309321	0.264411	0.185763
	0.00653773	0.09764	0.115998	0.264463	0.185654		-0.0277362	0.140336	0.309321	0.264411	0.185763
	-0.00334191	0.09764	0.309379	0.264463	0.185654		0.075415	0.234031	0.309321	0.264411	0.185763
	-0.00848677	0.0194894	0.309379	0.264463	0.185654		0.0123782	0.234031	0.309321	0.264411	0.185763
	0.0479206	0.234074	0.309379	0.264463	0.185654		0.0467619	0.234031	0.309321	0.264411	0.185763
	0.0814742	0.234074	0.309379	0.264463	0.185654		0.0123782	0.234031	0.309321	0.264411	0.185763
	-0.0132216	0.234074	0.309379	0.264463	0.185654		-0.0220056	0.234031	0.309321	0.264411	0.185763
	-0.00293185	0.0249549	0.0811013	0.264463	0.185654		0.075415	0.234031	0.309321	0.264411	0.185763
	0.00653773	0.09764	0.115998	0.264463	0.185654		-0.102234	0.104582	0.309321	0.264411	0.185763
	-0.00725657	0.234074	0.309379	0.264463	0.185654		-0.00481373	0.234031	0.309321	0.264411	0.185763
	0.0219723	0.13089	0.145401	0.237822	0.0335807		0.0238394	0.234031	0.309321	0.264411	0.185763
	0.0341263	0.0840277	0.115998	0.264463	0.185654		0.0696844	0.234031	0.309321	0.264411	0.185763
	0.103918	0.165253	0.233353	0.0959748	0.185654		0.0123782	0.234031	0.309321	0.264411	0.185763
	0.0936282	0.09764	0.115998	0.264463	0.185654		-0.0220056	0.234031	0.309321	0.264411	0.185763
	-0.00766664	0.234074	0.309379	0.264463	0.185654		0.0353007	0.234031	0.309321	0.264411	0.185763
	0.119353	0.234074	0.309379	0.264463	0.185654		0.0582232	0.234031	0.309321	0.264411	0.185763
	0.0341263	0.0840277	0.115998	0.264463	0.185654		0.0811457	0.234031	0.309321	0.264411	0.185763
	0.0376309	0.135716	0.145401	0.237822	0.0335807		-0.00481373	0.234031	0.309321	0.264411	0.185763
	0.0917639	0.234074	0.309379	0.264463	0.185654		0.0524925	0.234031	0.309321	0.264411	0.185763
	0.0341263	0.0840277	0.115998	0.264463	0.185654		-0.0691921	0.171621	0.309321	0.264411	0.185763
	-0.00766664	0.234074	0.309379	0.264463	0.185654		-0.0391975	0.234031	0.309321	0.264411	0.185763
	0.00653773	0.152403	0.309379	0.264463	0.185654		0.0353007	0.234031	0.309321	0.264411	0.185763
	0.0794239	0.145981	0.309379	0.264463	0.185654		-0.0391975	0.234031	0.309321	0.264411	0.185763
	-0.0727235	0.234074	0.309379	0.264463	0.185654		-0.0334669	0.234031	0.309321	0.264411	0.185763
	-0.0183664	0.234074	0.309379	0.264463	0.185654		0.0410313	0.234031	0.309321	0.264411	0.185763
	-0.0171362	0.09764	0.309379	0.264463	0.185654		0.184297	0.234031	0.309321	0.264411	0.185763
	-0.0266058	0.135716	0.145401	0.237822	0.0335807		0.0410313	0.234031	0.309321	0.264411	0.185763
	0.00653773	0.09764	0.115998	0.264463	0.185654		-0.016275	0.140336	0.309321	0.264411	0.185763
	0.0652195	0.09764	0.309379	0.264463	0.185654		0.0009169	0.234031	0.309321	0.264411	0.185763
	0.0298592	0.120134	0.115998	0.264463	0.185654		0.0639538	0.234031	0.309321	0.264411	0.185763
	-0.0313406	0.0956429	0.309379	0.264463	0.185654		0.02957	0.234031	0.309321	0.264411	0.185763
	0.100003	0.234074	0.309379	0.264463	0.185654		0.0410313	0.234031	0.309321	0.264411	0.185763
	0.0633552	0.234074	0.309379	0.264463	0.185654		0.075415	0.234031	0.309321	0.264411	0.185763
	0.00922219	0.216941	0.277329	0.264463	0.185654		0.0353007	0.234031	0.309321	0.264411	0.185763
	-0.0175463	0.234074	0.309379	0.264463	0.185654		0.149913	0.234031	0.309321	0.264411	0.185763
	0.0219723	0.13089	0.145401	0.237822	0.0335807		-0.0270018	0.234031	0.309321	0.264411	0.185763
	0.00653773	0.152403	0.309379	0.264463	0.185654		0.0524925	0.234031	0.309321	0.264411	0.185763
	0.119353	0.165253	0.233353	0.0959748	0.185654		0.0467619	0.234031	0.309321	0.264411	0.185763
	-0.0313406	0.234074	0.309379	0.264463	0.185654		0.12126	0.234031	0.309321	0.264411	0.185763
	0.0707744	0.173916	0.309379	0.264463	0.185654		-0.016275	0.0420114	0.309321	0.264411	0.185763
	-0.0640724	0.234074	0.309379	0.264463	0.185654		0.109799	0.234031	0.309321	0.264411	0.185763
	0.0538856	0.234074	0.309379	0.264463	0.185654		0.0696844	0.234031	0.309321	0.264411	0.185763
	0.0034432	0.234074	0.309379	0.264463	0.185654		0.0467619	0.234031	0.309321	0.264411	0.185763
	-0.0360754	0.0249549	0.309379	0.264463	0.185654		0.0009169	0.234031	0.309321	0.264411	0.185763
	0.103918	0.165253	0.233353	0.0959748	0.185654		0.02957	0.234031	0.309321	0.264411	0.185763
	0.00180294	0.234074	0.309379	0.264463	0.185654		0.0868763	0.234031	0.309321	0.264411	0.185763
	0.159915	0.234074	0.309379	0.264463	0.185654		0.0582232	0.234031	0.309321	0.264411	0.185763
	-0.0128115	0.09764	0.309379	0.264463	0.185654		0.0009169	0.234031	0.309321	0.264411	0.185763
	0.0917639	0.152403	0.309379	0.264463	0.185654		0.0009169	0.234031	0.309321	0.264411	0.185763
	-0.0266058	0.145981	0.309379	0.264463	0.185654		0.0123782	0.234031	0.309321	0.264411	0.185763
	0.0281613	0.234074	0.309379	0.264463	0.185654		0.0696844	0.234031	0.309321	0.264411	0.185763
	0.0293915	0.216941	0.277329	0.264463	0.185654		0.0811457	0.234031	0.309321	0.264411	0.185763
	0.0151872	0.0249549	0.309379	0.264463	0.185654		-0.0277362	0.234031	0.309321	0.264411	0.185763
	0.0613049	0.234074	0.309379	0.264463	0.185654		-0.0965037	0.100112	0.309321	0.264411	0.185763
	-0.0309305	0.152403	0.309379	0.264463	0.185654		0.0811457	0.234031	0.309321	0.264411	0.185763
	0.032858	0.104723	0.211969	0.404528	0.22838		-0.0105444	0.234031	0.309321	0.264411	0.185763
	-0.0717061	0.219044	0.211969	0.404528	0.22838		0.0983375	0.234031	0.309321	0.264411	0.185763
	0.0645535	0.168272	0.211969	0.404528	0.22838		0.02957	0.234031	0.309321	0.264411	0.185763
	-0.0351941	0.104723	0.211969	0.404528	0.22838		0.0353007	0.234031	0.309321	0.264411	0.185763
	0.0400655	0.219044	0.211969	0.404528	0.22838		0.0811457	0.234031	0.309321	0.264411	0.185763
	0.0156657	0.219044	0.211969	0.404528	0.22838		-0.06212	0.104582	0.309321	0.264411	0.185763
	-0.0378699	0.104723	0.0941621	0.404528	0.22838		-0.0449281	0.234031	0.309321	0.264411	0.185763
	0.0120211	0.136405	0.211969	0.404528	0.22838		0.0123782	0.234031	0.309321	0.264411	0.185763
	0.0424565	0.136405	0.211969	0.404528	0.22838		-0.0449281	0.104582	0.309321	0.264411	0.185763
	0.059202	0.113551	0.211969	0.404528	0.22838		0.0696844	0.234031	0.309321	0.264411	0.185763
	0.0521843	0.104723	0.211969	0.404528	0.22838		-0.0391975	0.234031	0.309321	0.264411	0.185763
	0.138743	0.219044	0.211969	0.404528	0.22838		0.00664753	0.234031	0.309321	0.264411	0.185763
	0.00594453	0.191222	0.226487	0.404528	0.22838		0.00664753	0.234031	0.309321	0.264411	0.185763
	-0.0350992	0.191222	0.226487	0.404528	0.22838		0.0868763	0.234031	0.309321	0.264411	0.185763
	-0.0336835	0.0111123	0.0609372	0.150301	0.338246		-0.0793119	0.171621	0.309321	0.264411	0.185763
	-0.0211244	0.104723	0.211969	0.404528	0.22838		-0.0277362	0.234031	0.309321	0.264411	0.185763
	-0.0350992	0.191222	0.226487	0.404528	0.22838		0.0582232	0.234031	0.309321	0.264411	0.185763
	0.0466429	0.136405	0.211969	0.404528	0.22838		0.12126	0.234031	0.309321	0.264411	0.185763
	-0.00588959	0.0496048	0.226487	0.404528	0.22838		0.0696844	0.234031	0.309321	0.264411	0.185763
	-2.85907e-06	0.113551	0.211969	0.404528	0.22838		0.12126	0.234031	0.309321	0.264411	0.185763
	0.0255555	0.219044	0.211969	0.404528	0.22838		0.0524925	0.234031	0.309321	0.264411	0.185763
	0.0913538	0.0682524	0.0941621	0.404528	0.22838		0.149913	0.234031	0.309321	0.264411	0.185763
	-0.0357293	0.105795	0.211969	0.404528	0.22838		-0.0506587	0.145955	0.309321	0.264411	0.185763
	-2.85907e-06	0.104723	0.185399	0.404528	0.22838		0.0238394	0.234031	0.309321	0.264411	0.185763
	0.0107609	0.219044	0.211969	0.404528	0.22838		0.0696844	0.234031	0.309321	0.264411	0.185763
	-0.0418664	0.100491	0.127691	0.404528	0.22838		-0.0391975	0.234031	0.309321	0.264411	0.185763
	0.0315029	0.219044	0.211969	0.404528	0.22838		0.0983375	0.234031	0.309321	0.264411	0.185763
	-0.0147026	0.0474119	0.127691	0.404528	0.22838		0.104068	0.234031	0.309321	0.264411	0.244231
	-0.0340289	0.219044	0.211969	0.404528	0.22838		0.0696844	0.234031	0.309321	0.264411	0.185763
	-0.0294972	0.105795	0.211969	0.404528	0.22838		0.0123782	0.234031	0.309321	0.264411	0.185763
	0.0104156	-4.16334e-17	0.211969	0.404528	0.22838		0.02957	0.234031	0.309321	0.264411	0.185763
	0.0926928	0.219044	0.211969	0.404528	0.22838		-0.06212	0.0956257	0.309321	0.264411	0.185763
	-0.0436617	0.219044	0.211969	0.404528	0.22838		-0.0334669	0.0822351	0.309321	0.264411	0.185763
	0.0257111	0.100491	0.127691	0.404528	0.22838		-0.0220056	0.0075494	0.309321	0.264411	0.185763
	-2.85907e-06	0.104723	0.211969	0.404528	0.22838		0.0410313	0.234031	0.309321	0.264411	0.185763
	0.00364834	0.0474119	0.0941621	0.404528	0.22838		0.0467619	0.234031	0.309321	0.264411	0.185763
	-0.0227299	0.219044	0.211969	0.404528	0.22838		0.02957	0.234031	0.309321	0.264411	0.185763
	0.0310764	0.104723	0.0941621	0.404528	0.22838		-0.0334669	0.171621	0.309321	0.264411	0.185763
	0.0232251	0.191222	0.226487	0.404528	0.22838		-0.0449281	0.140336	0.309321	0.264411	0.185763
	-0.00170323	0.104723	0.211969	0.404528	0.22838		-0.0277362	0.234031	0.309321	0.264411	0.185763
	0.0316927	0.113551	0.211969	0.404528	0.22838		0.0123782	0.234031	0.309321	0.264411	0.185763
	0.0312511	0.100491	0.127691	0.404528	0.22838		-0.0220056	0.171621	0.309321	0.264411	0.185763
	0.138743	0.219044	0.211969	0.404528	0.22838		-0.0220056	0.171621	0.309321	0.264411	0.185763
	0.0316927	0.113551	0.211969	0.404528	0.22838		-0.0105444	0.234031	0.309321	0.264411	0.185763
	-0.0376801	0.104723	0.185399	0.404528	0.22838		-0.00481373	0.104582	0.309321	0.264411	0.185763
	0.116741	0.219044	0.211969	0.404528	0.22838		0.0582232	0.234031	0.309321	0.264411	0.185763
	-0.0256562	0.214763	0.211969	0.404528	0.22838		0.00664753	0.234031	0.309321	0.264411	0.185763
	0.0566211	0.237618	0.205528	0.497405	0.22838		-0.00680375	0.123233	0.166811	0.0959595	0.327089
	0.102231	0.219044	0.211969	0.404528	0.22838		0.0641775	0.0976259	0.124652	0.0959595	0.172056
	-0.0842652	0.219044	0.211969	0.404528	0.22838		0.139676	0.219175	0.212098	0.404784	0.22839
	-0.0921027	0.219044	0.211969	0.404528	0.22838		-0.0287299	0.219175	0.212098	0.404784	0.22839
	-2.85907e-06	0.104723	0.0941621	0.404528	0.22838		-0.101004	0.125806	0.212098	0.404784	0.22839
	0.116741	0.219044	0.211969	0.404528	0.22838		-0.0213414	0.104676	0.0941185	0.297987	0.225823
	0.108368	0.13967	0.173486	0.150301	0.338246		0.0436792	0.184358	0.211458	0.297987	0.225823
	-0.0717061	0.104723	0.0941621	0.404528	0.22838		0.0110131	0.104676	0.211458	0.297987	0.225823
	0.154418	0.214763	0.211969	0.404528	0.22838		0.0211041	0.104676	0.0941185	0.297987	0.225823
	-0.00170323	0.104723	0.211969	0.404528	0.22838		0.0511696	0.0942607	0.211458	0.297987	0.225823
	0.138743	0.219044	0.211969	0.404528	0.22838		0.00360058	0.184358	0.211458	0.297987	0.225823
	0.0688348	0.136405	0.211969	0.404528	0.22838		0.05866	0.136825	0.211458	0.297987	0.225823
	-2.85907e-06	0.104723	0.0941621	0.404528	0.22838		-0.00893536	0.104676	0.211458	0.297987	0.225823
	-0.0753573	0.219044	0.211969	0.404528	0.22838		0.0660985	0.184358	0.211458	0.297987	0.225823
	0.0146019	0.104723	0.211969	0.404528	0.22838		0.0511437	0.206864	0.213734	0.271537	0.225823
	0.0706907	0.100491	0.127691	0.404528	0.22838		0.0160326	0.104676	0.211458	0.297987	0.225823
	0.00194797	0.104723	0.211969	0.404528	0.22838		-0.00144496	0.104676	0.211458	0.297987	0.225823
	-0.0795437	0.104723	0.0941621	0.404528	0.22838		0.0311433	0.189354	0.211458	0.297987	0.225823
	0.0444714	0.104723	0.0941621	0.404528	0.22838		-0.0190265	0.184358	0.211458	0.297987	0.225823
	0.146045	0.219044	0.211969	0.404528	0.22838		0.0486988	0.184358	0.211458	0.297987	0.225823
	0.06937	0.219044	0.211969	0.404528	0.22838		0.0787123	0.184358	0.211458	0.297987	0.225823
	0.147115	0.219044	0.211969	0.404528	0.22838		-0.00888341	0.210755	0.143643	0.297987	0.225823
	0.116741	0.219044	0.211969	0.404528	0.22838		0.0160326	0.0682218	0.211458	0.297987	0.225823
	-0.0378699	0.104723	0.211969	0.404528	0.22838		-0.0264129	0.184358	0.211458	0.297987	0.22839
	0.108368	0.13967	0.173486	0.150301	0.338246		0.0636536	0.184358	0.211458	0.297987	0.225823
	-2.85907e-06	0.104723	0.0941621	0.404528	0.22838		0.0837059	0.184358	0.211458	0.297987	0.225823
[truncated: 25,772 more rows]
